# Supplementary material for: Protocol for a pragmatic randomised controlled trial of Body Brain Life—General Practice and a Lifestyle Modification Programme to decrease dementia risk exposure in a primary care setting
Source: PubMed Central journal article supplement — BMJ Open. 2018 Mar 17;8(3):e019329. doi: 10.1136/bmjopen-2017-019329 (PMC5875671; doi:10.1136/bmjopen-2017-019329), 2018-03-17
Supplement: bmjopen-2017-019329.draft_revisions.pdf [file bmjopen-2017-019329.draft_revisions.pdf]

# BMJ Open

BMJ Open is committed to open peer review. As part of this commitment we make the peer review history of every article we publish publicly available.

When an article is published we post the peer reviewers' comments and the authors' responses online. We also post the versions of the paper that were used during peer review. These are the versions that the peer review comments apply to.

The versions of the paper that follow are the versions that were submitted during the peer review process. They are not the versions of record or the final published versions. They should not be cited or distributed as the published version of this manuscript.

BMJ Open is an open access journal and the full, final, typeset and author-corrected version of record of the manuscript is available on our site with no access controls, subscription charges or pay-per-view fees (<http://bmjopen.bmj.com>).

If you have any questions on BMJ Open's open peer review process please email [info.bmjopen@bmj.com](mailto:info.bmjopen@bmj.com)

# BMJ Open

## Protocol for a randomised controlled trial of Body Brain Life – GP and a Lifestyle Modification Program to decrease dementia risk exposure in a primary care setting

|                                 |                                                                                                                                                                                                                                                                                                                                                                                                                                                                                                                                                                                                                                                                                                                                                                                                                                                                                                                        |
|---------------------------------|------------------------------------------------------------------------------------------------------------------------------------------------------------------------------------------------------------------------------------------------------------------------------------------------------------------------------------------------------------------------------------------------------------------------------------------------------------------------------------------------------------------------------------------------------------------------------------------------------------------------------------------------------------------------------------------------------------------------------------------------------------------------------------------------------------------------------------------------------------------------------------------------------------------------|
| Journal:                        | <i>BMJ Open</i>                                                                                                                                                                                                                                                                                                                                                                                                                                                                                                                                                                                                                                                                                                                                                                                                                                                                                                        |
| Manuscript ID                   | bmjopen-2017-019329                                                                                                                                                                                                                                                                                                                                                                                                                                                                                                                                                                                                                                                                                                                                                                                                                                                                                                    |
| Article Type:                   | Protocol                                                                                                                                                                                                                                                                                                                                                                                                                                                                                                                                                                                                                                                                                                                                                                                                                                                                                                               |
| Date Submitted by the Author:   | 29-Aug-2017                                                                                                                                                                                                                                                                                                                                                                                                                                                                                                                                                                                                                                                                                                                                                                                                                                                                                                            |
| Complete List of Authors:       | Kim, Sarang; Australian National University, Centre for Research on Ageing, Health and Wellbeing<br>McMaster, Mitchell; Australian National University, Centre for Research on Ageing, Health and Wellbeing<br>Torres, Susan ; Deakin University<br>Cox, Kay L.<br>Lautenschlager, Nicola; University of Melbourne, Academic Unit of Psychiatry of Old Age<br>Rebok, George; Johns Hopkins Bloomberg School of Public Health, Psychiatry and Behavioral Sciences<br>Pond, Dimity; University of Newcastle Australia, General Practice<br>D'Este, Catherine; ANU College of Medicine, Biology and Environment The Australian National University, National Centre for Epidemiology and Population Health (NCEPH)<br>McRae, Ian; Australian National University, School of Population Health<br>Cherbuin, Nicolas; Australian National University, Centre for Research on Ageing, Health and Wellbeing<br>Anstey, Kaarin |
| <b>Primary Subject Heading</b>: | Public health                                                                                                                                                                                                                                                                                                                                                                                                                                                                                                                                                                                                                                                                                                                                                                                                                                                                                                          |
| Secondary Subject Heading:      | Medical education and training                                                                                                                                                                                                                                                                                                                                                                                                                                                                                                                                                                                                                                                                                                                                                                                                                                                                                         |
| Keywords:                       | RCT, Dementia < NEUROLOGY, Lifestyle change, online, Australia, General practice                                                                                                                                                                                                                                                                                                                                                                                                                                                                                                                                                                                                                                                                                                                                                                                                                                       |
|                                 |                                                                                                                                                                                                                                                                                                                                                                                                                                                                                                                                                                                                                                                                                                                                                                                                                                                                                                                        |

SCHOLARONE™  
Manuscripts

1  
2  
3  
4  
5 Protocol for a randomised controlled trial of Body Brain Life – GP and a Lifestyle  
6 Modification Program to decrease dementia risk exposure in a primary care setting  
7  
8  
9  
10  
11  
12  
13  
14  
15  
16  
17  
18

19 Authors: Sarang Kim<sup>1\*</sup>, Mitchell McMaster<sup>1</sup>, Susan Torres<sup>2</sup>, Kay Cox<sup>3</sup>, Nicola  
20 Lautenschlager<sup>4</sup>, George Rebok<sup>5</sup>, Dimity Pond<sup>6</sup>, Catherine D’Este<sup>7</sup>, Ian McRae<sup>1</sup>, Nicolas  
21 Cherbuin<sup>1</sup>, Kaarin J Anstey<sup>1</sup>  
22  
23  
24  
25  
26  
27  
28

29 <sup>1</sup> Centre for Research on Ageing Health & Wellbeing, Australian National University,  
30 Canberra, Australia  
31  
32

33 <sup>2</sup> School of Exercise and Nutrition Sciences, Deakin University, Burwood, Australia  
34  
35

36 <sup>3</sup> University of Western Australia Medical School, Crawley, Australia  
37  
38

39 <sup>4</sup> Academic Unit for Psychiatry of Old Age, University of Melbourne, Melbourne, Australia  
40  
41

42 <sup>5</sup> Johns Hopkins Center on Aging and Health, Baltimore, USA  
43  
44

45 <sup>6</sup> School of Medicine and Public Health, University of Newcastle, Callaghan, Australia  
46  
47

48 <sup>7</sup> National Centre for Epidemiology & Population Health, Australian National University,  
49 Canberra, Australia  
50  
51  
52  
53  
54  
55  
56  
57  
58  
59  
60

1  
2  
3  
4  
5  
6 Corresponding author:  
7

8 Dr Sarang Kim  
9

10 Centre for Research on Ageing Health & Wellbeing, Building 54, Mills Road, Australian  
11  
12

13 National University, Acton ACT 2601, Australia  
14  
15

16 E: [sarang.kim@anu.edu.au](mailto:sarang.kim@anu.edu.au)  
17

18  
19 T: +61 2 6125 0713  
20  
21  
22  
23

24 Word count: 4191  
25  
26  
27  
28  
29  
30  
31  
32  
33  
34  
35  
36  
37  
38  
39  
40  
41  
42  
43  
44  
45  
46  
47  
48  
49  
50  
51  
52  
53  
54  
55  
56  
57  
58  
59  
60

## Abstract

**Introduction:** It has been estimated that a 10% to 25% reduction in seven key risk factors could potentially prevent 1.1 to 3.0 million Alzheimer's disease cases globally per annum. In addition, as dementia is preceded by more subtle cognitive deficits which have substantial social and economic impact, effective preventative interventions would likely have more extensive benefits. The current study evaluates in primary care a multi-domain risk reduction intervention targeting adults with high risk of developing dementia.

**Methods and analysis:** A randomised controlled trial (RCT) is being conducted to evaluate three intervention programs: 1) A 12-week online and face-to-face dementia risk reduction intervention (BBL-GP); 2) A 6-week face-to-face group intervention (LMP); and 3) A 12-week email-only program (active control). We aim to recruit 240 participants to undergo a comprehensive cognitive and physical assessment at baseline and follow ups (post intervention, 18, 36 and 62 weeks). The primary outcome is dementia risk measured with the modified version of the ANU-ADRI-Short Form. Secondary outcomes are cognitive function measured with Trail A and B, and the Digit Symbol Modalities Test; physical activity with Moderate-Vigorous Physical Activity and the International Physical Activity Questionnaire; depression with the Centre for Epidemiological Studies Depression Scale; cost evaluation with the SF-12 health survey, Framingham coronary heart disease risk score, and Australian type 2 diabetes risk assessment tool; diet quality with the Australian Recommended Food Score; and sleep quality with the Pittsburgh Sleep Quality Index.

**Ethics and dissemination:** This RCT is a novel intervention applied in a primary care setting to reduce the dementia risk exposure in adults at high risk. If successful, BBL-GP and LMP will provide a versatile, evidence-based package that can be easily and quickly rolled-out to other primary care settings and which can be scaled up at relatively low cost compared to other strategies involving intensive interventions.

1  
2  
3  
4  
5  
6 Trial registration: Reg. no. ACTRN12616000868482  
7  
8  
9  
10

11 Keywords: RCT, dementia, lifestyle change, online, physical activity, diet, cardiovascular  
12  
13 risk factors, Australia, general practice, primary care.  
14  
15  
16  
17  
18  
19  
20  
21  
22  
23  
24  
25  
26  
27  
28  
29  
30  
31  
32  
33  
34  
35  
36  
37  
38  
39  
40  
41  
42  
43  
44  
45  
46  
47  
48  
49  
50  
51  
52  
53  
54  
55  
56  
57  
58  
59  
60

For peer review only

### Strengths and limitations of this study

- This study has been built on our dementia prevention research programs which has been shown to reduce cognitive decline in older adults at-risk of dementia.
- This trial evaluates a multi-domain risk reduction intervention targeting adults with high risk of developing dementia in primary care.
- A naturalistic approach is used in this trial to ensure the program can be adapted efficiently in primary care settings if proven effective.
- We are aware that most of our outcomes are self-reported and therefore can be subjective. Accordingly, we will interpret data conservatively.

## Introduction

No cure is available for Alzheimer's disease and other types of dementia. However, it is estimated that an achievable 10% to 25% reduction in seven key risk factors could prevent 1.1 to 3.0 million Alzheimer's disease (AD) cases internationally per annum (Barnes & Yaffe, 2011). It is also estimated that if each of seven risk factors was to be reduced by 5%, 10%, 15% and 20% per decade, dementia prevalence would be reduced by between 1.6 and 7.2% in 2020, 3.3-14.9% in 2030, 4-9 – 22.8% in 2040 and 6.6-30.7% in 2050 (Ashby-Mitchell, Burns, Shaw, & Anstey, 2017). Furthermore, as dementia is preceded by more subtle cognitive deficits which have substantial social and economic impacts, effective preventative interventions would likely have additional benefits.

Increasingly and to afford a greater chance of producing detectable changes during study timeframes, the dementia research community has focused on multi-domain interventions that address multiple risk factors simultaneously (Ngandu et al., 2015). Among individuals with high risk factor burden, cognitive decline can be reduced (and possibly reversed) as a result of cardiovascular risk reduction and increase in activities that stimulate and protect the brain including cognitive, social and physical activity and an appropriate diet (Prince, Albanese, Guerchet, & Prina, 2014). Alzheimer's disease and cardiovascular disease share cardiometabolic and lifestyle risk factors and cardiovascular risk reduction can be achieved by smoking cessation, increasing physical activities, adopting a healthy diet, reducing abnormally high blood pressure and cholesterol, and managing major depression, overweight/obesity and diabetes if present (Santos et al., 2017). Altogether, the literature supports the view that multi-domain interventions aimed at reducing cardiometabolic risk and promoting behaviours shown to protect against dementia will contribute to preventing cognitive decline, reduce overall risk of AD, and lower depressive symptoms.

Insufficient physical activity is the risk factor with the most evidence to support its



1  
2  
3 role as a treatment for Mild Cognitive Impairment (MCI; Blondell, Hammersley-Mather, &  
4 Veerman, 2014) and more generally cognitive decline (Northey, Cherbuin, Pampa, Smee, &  
5 Rattray, 2017). Physical activity has also been shown in RCTs to benefit several other risk  
6 factors for dementia including depression (Mammen & Faulkner, 2013), and cardiovascular  
7 risk factors (Brouwer, van der Graaf, Soedamah-Muthu, Wassink, & Visseren, 2010).  
8  
9 Physical activity not only modifies multiple risk factors but it has direct benefits for brain  
10 health and cognition.  
11  
12

13  
14  
15  
16  
17  
18 To bring about risk reduction, there needs to be long-lasting behavioural change in  
19 multiple areas. Achieving this requires using techniques such as goal setting, decreasing  
20 barriers to change, improving self-monitoring, having access to information, and maintaining  
21 motivation (Locke, 1996; Middleton, Anton, & Perri, 2013). Therefore, this RCT investigates  
22 whether lifestyle management programs that offer not only health promoting information, but  
23 also practical behaviour change techniques which can be implemented in daily life can reduce  
24 dementia risk.  
25  
26  
27  
28  
29  
30  
31

### 32 33 *Recruitment in general practice setting*

34  
35 Primary care is an ideal setting for the implementation of the current program because  
36 it is where adults with high risk of developing dementia are identified and early intervention  
37 and treatment are provided (The Department of Health, 2013). Assessment of cardiovascular  
38 risk factors is common in primary care, as is advice about physical activity and diet. General  
39 practitioners (GP) commonly screen for diabetes and increasingly identify depression. GPs  
40 are often the first point of contact for patients who are worried that they may have dementia  
41 (Robinson, Tang, & Taylor, 2015).  
42  
43  
44  
45  
46  
47  
48  
49

50 Although there has been one study conducted in primary care setting with elderly  
51 participants (70-78 years old; Richard et al., 2009), the current program is the first of its kind  
52 to provide interventions to adults (18 years and above) at the primary care setting, addressing  
53  
54  
55  
56  
57  
58  
59  
60

1  
2  
3 both cardiovascular and lifestyle risk factors of dementia.

## 4 **Methods and analysis**

### 5 *Study setting and design*

6  
7  
8  
9  
10 This project is a 6-12 week, single-blind randomised controlled trial that is designed to assist  
11 participants develop and maintain a healthy lifestyle, as well as manage chronic diseases. The  
12 study evaluates the implementation of an evidence-based dementia risk reduction program  
13 that we developed and have evaluated previously on volunteers and which has now been  
14 adapted for primary care (BBL-GP). The primary care setting in which the study is held  
15 already conducted a lifestyle management program (LMP) aimed to reduce vascular risk  
16 factors. The LMP program was initially developed to consist of 12 sessions over 12 weeks.  
17 However, its format was changed prior to this trial to have 12 sessions over 6 weeks. This  
18 decision was made by the clinic which provides this program in order for the program to be  
19 offered 4 times a year. The current LMP program was chosen as a comparison condition for  
20 feasibility and to enable evaluation of an existing program for dementia and cardiovascular  
21 risk reduction. The efficacy of the existing program had not previously been evaluated.  
22  
23  
24  
25  
26  
27  
28  
29  
30  
31  
32  
33  
34

35  
36 The existing LMP program included 6 weeks of face-to-face group education sessions.  
37  
38 The BBL-GP program included 12 weeks of individually tailored online education sessions  
39 with one hour face-to-face individual sessions with a dietitian and an exercise physiologist.  
40  
41 The BBL-GP and LMP are being compared to an active control group receiving weekly email  
42 with links to health information. The study is being conducted in Canberra, Australian  
43  
44  
45  
46  
47  
48  
49  
50  
51  
52  
53  
54  
55  
56  
57  
58  
59  
60

Capital Territory, Australia. The trial has been designed and is conducted according to the  
Consolidated Standards of Reporting Trials (CONSORT) reporting guidelines.

### *Participants*

Participants are being recruited from the National Health Co-op (NHC), the largest bulk billing general practice organisation in Canberra comprising of eight clinics. Bulk Billing is a payment option where the doctor bills directly the universal health insurance system (Medicare) in Australia for a medical service that the patients receive. Invitation emails have been sent to all members excluding members who are inactive (those who did not renew their memberships), those aged less than 18 years, or without email addresses. Posters at the clinics are also being used for the recruitment. Potential participants who express their interest by contacting the LMP coordinator at the NHC or registering on the NHC's website are assessed against the inclusion and exclusion criteria. These are the types of adults who a GP would refer to a dementia risk reduction trial in 'real life' and on whom we are aiming to evaluate our intervention in a naturalistic context. If criteria are met, information sheets and consent forms are sent to potential participants. Upon return of consent forms, each participant is officially registered to the study and allocated a unique identity numbers and as well as an online account.

### *Inclusion criteria*

A naturalistic approach is used in recruitment and the study inclusion criteria being used for this study are those already used by the NHC to refer patients to the LMP program (prior to this research project). We aimed to optimize the seamlessness of the intervention in primary care and utilize existing referral pathways to increase the probability that the intervention is conducted in a manner that could lead to implementation in real life. Participants must be aged 18 years and over, reside in the Australian Capital Territory, be current financial members of the NHC, have access to a computer and internet connection at home, be fluent in English, Australian permanent residents or citizens (to be able to bulk billed), and must be

1  
2  
3 the only person in their household who is taking part in this study. To be eligible for the study,  
4  
5 participants are also required to have a chronic health condition (high blood pressure, heart  
6  
7 disease, type 2 diabetes or 'pre-diabetes', osteoporosis, osteoarthritis, polycystic ovary  
8  
9 syndrome (PCOS), kidney or liver disease, and depression/anxiety) or be overweight or obese  
10  
11 (BMI>25). They are also required to agree to commit 1-2 hours a week to complete the  
12  
13 program and be interested in obtaining advice on improving their lifestyle to reduce the risk  
14  
15 of or better manage chronic disease. Participants are required to complete online assessments  
16  
17 and attend NHC at baseline and 18, 36, and 62 weeks after commencement of the  
18  
19 intervention for medical and cognitive assessments.  
20  
21

### 22 23 *Exclusion criteria*

24  
25 Participants are not eligible to enrol in the trial if they have significant and unstable medical  
26  
27 and psychiatric conditions that would prevent participation in the trial. They are also  
28  
29 ineligible if they have sensory deficits or mobility limitations that would prevent or  
30  
31 substantially restrict the delivery of the assessment or intervention, have cognitive  
32  
33 impairment, or are pregnant.  
34  
35

### 36 37 *Sample size calculations*

38  
39 Sample size calculations were estimated using G\*Power (version 3.1.9.2;  
40  
41 <http://www.gpower.hhu.de/en.html>) and have been based on medium effect size as  
42  
43 observed in the previous Body Brain Life project. To detect a medium effect in a 3-  
44  
45 group design (1:1:1), 4 measurements with a 5% risk of type 1 error ( $\alpha$ ) and 80%  
46  
47 power, a total sample size of 159 persons is required. To account for a 33% attrition  
48  
49 (based on previous lifestyle modification program by NHC), a baseline sample of 240  
50  
51 is being recruited (80 in BBL-GP group, 80 in LMP group and 80 in control group).  
52  
53  
54  
55  
56  
57  
58  
59  
60

### *Assessments*

Participants who meet all inclusion and no exclusion criteria are invited to complete online surveys and visit NHC for the baseline evaluation, and for week 18, 36, and 62 follow ups. Immediate follow up is also conducted online at week 7 for LMP, and week 13 for BBL-GP and control groups. Table 1 summarizes the assessment measures and schedule.

### *Screening measures and covariate*

In addition to the above inclusion and exclusion criteria, further screening measures are conducted to ensure that participants are capable of taking part in the study. The Adult Pre-exercise Screening System (APSS; Exercise & Sports Science Australia, 2011) is used at the baseline assessment to identify individuals with acute/high risk conditions, or who may be at higher risk of an adverse event during exercise. To screen for any cognitive impairment (<25), the Mini-Mental State Examination (MMSE; Folstein, Folstein, & McHugh, 1975) is administered to participants aged 60 and older.

Health efficacy and motivation for healthiness subscales from the Multidimensional Health Questionnaire (MHQ; Snell & Johnson, 1997) is used to measure the extent to which people believe they have the ability, capability, skills and talents to take care of their own physical health, and to measure people's motivation to keep in good physical health.

### *Primary outcome*

The primary outcome is one's exposure profile to demonstrated risk factors for Alzheimer's disease. It is measured with a modified version of the Australian National University Alzheimer's Disease Risk Index – Short form (ANU-ADRI – SF; Kim, Cherbuin, & Anstey, 2016). The ANU-ADRI-SF is comprised of validated scales assessing 15 individual risk and protective factors for Alzheimer's disease and dementia. However, for the assessment of engagement in cognitive activities levels only, items from the original ANU-ADRI (Anstey,

1  
2  
3 Cherbuin, & Herath, 2013; Anstey et al., 2014) are used in place of those from the ANU-  
4 ADRI-SF due to limitations of the latter.  
5  
6

### 7 *Secondary outcomes*

8  
9  
10 Secondary outcomes include cognitive function, physical activity level, depressive symptoms,  
11 cost of interventions, diet and sleep quality. They are measured as follows: cognitive function  
12 is assessed with processing speed and task switching using Trails A and B, and the Digit  
13 Symbol Modalities Test. Moderate-vigorous Physical Activity (MVPA) is a continuous  
14 measure of activity that registers three or more Metabolic Equivalents (METs) for 10 minutes  
15 or longer on an ActiGraph Link activity monitor  
16 (<http://actigraphcorp.com/products/actigraph-link/>), which is worn for 7 days. Self-reported  
17 physical activity is also being recorded using the short form of IPAQ (Craig et al., 2003),  
18 which is part of the ANU-ADRI-SF. Depression is being assessed with the Centre for  
19 Epidemiological Studies Depression Scale (Radloff, 1977), which is also part of the ANU-  
20 ADRI.  
21  
22  
23  
24  
25  
26  
27  
28  
29  
30  
31  
32  
33

34  
35 Health outcomes are assessed with the SF-12 health survey (Ware, Kosinski, & Keller,  
36 1996), Framingham coronary heart disease risk score (Wilson et al., 1998), and Australian  
37 type 2 diabetes risk assessment tool (AUSDRISK; Chen et al., 2010) to enable cost  
38 effectiveness evaluation of the two health promotion interventions.  
39  
40  
41  
42  
43

44 Dietary quality is assessed with a food-based diet quality index, the Australian  
45 Recommended Food Score (ARFS; Collins et al., 2015). The ARFS is aligned with  
46 Australian Dietary Guidelines (National Health and Medical Research Council, 2013) and the  
47 Australian Guide to Healthy Eating (National Health and Medical Research Council, 2003)  
48 recommendations. The ARFS total ranges from 0 to 73 and includes eight subscales:  
49 vegetables (0 to 21), fruit (0 to 12), protein (0 to 7), vegetarian alternatives (0 to 6), grains (0  
50  
51  
52  
53  
54  
55  
56  
57  
58  
59  
60

1  
2  
3 to 13), dairy (0 to 11), water (0 to 1), sauces and condiments (0 to 2). Higher scores indicate  
4  
5 greater compliance with the Australian Dietary Guidelines and therefore better diet quality.  
6  
7 The ARFS has demonstrated good validity and reproducibility (Collins et al., 2015).  
8  
9

10       Lastly, the Pittsburgh Sleep Quality Index (PSQI; Buysse, Reynolds, Monk, Berman,  
11 & Kupfer, 1989) is an effective instrument used to measure the quality and patterns of sleep  
12 in adults. It differentiates “poor” from “good” sleep quality by measuring seven areas  
13 (components): subjective sleep quality, sleep latency, sleep duration, habitual sleep efficiency,  
14 sleep disturbances, use of sleeping medications, and daytime dysfunction over the last month.  
15  
16  
17  
18  
19

### 20 21 *Randomization*

22  
23  
24 Upon completion of the baseline assessment, participants are randomly allocated into one of  
25 the three groups. The allocation sequence is generated by an independent researcher and is  
26 not known to the study team at the time of enrolment and baseline assessment. A permuted  
27 block randomization sequence comprising block sizes of 6 stratified by gender and age group  
28 (18-49 vs 50+) is used.  
29  
30  
31  
32  
33

### 34 35 *Interventions*

#### 36 37 38 *Group 1: Body Brain Life – General Practice (BBL-GP)*

39  
40  
41 BBL-GP is an intervention package that builds on our dementia prevention research programs.  
42 This includes an online dementia risk reduction program called the Body Brain Life (BBL;  
43 Trial ID: ACTRN12612000147886) (Anstey et al., 2015; Anstey, Bahar-Fuchs, Herath,  
44 Rebok, & Cherbuin, 2013) and the Fitness for the Ageing Brain Study (FABS; Trial ID:  
45 ACTRN 12609000755235) (Cyarto et al., 2010; Lautenschlager et al., 2008). Contents for the  
46 BBL-GP online modules have been revised after extensive consumer evaluation by members  
47 of the Alzheimer’s Australia Consumer Dementia Research Network as well as members of  
48 the public and from participant feedback after the previous trial. The physical activity  
49  
50  
51  
52  
53  
54  
55  
56  
57  
58  
59  
60

1  
2  
3 program has also been modified for a younger age-group to 18 years and older. The  
4  
5 Actigraph device was introduced to measure the objective amount and intensity of physical  
6  
7 activity. This revised program (Body Brain Life – Fit) was piloted with the general public  
8  
9 (Trial ID: ACTRN12615000822583).  
10

11 Participants in the BBL-GP group are required to complete 8 modules (dementia  
12  
13 literacy, risk factors, physical activity, nutrition, health, cognitive activity, social activity and  
14  
15 mood) delivered online. Prior to commencing online modules, participants in the BBL-GP  
16  
17 group also receive an individually tailored plan/program for both dietary and physical activity  
18  
19 interventions developed and delivered by a dietitian and an exercise physiologist, respectively  
20  
21 during a face-to-face assessment. This is to ensure the dietary prescription and level of  
22  
23 physical activity are suitable and tailored to individual participants.  
24  
25

#### 26 *Physical activity session*

27  
28 The session duration and frequency of the physical activity (PA) program varies between  
29  
30 participants based on baseline physical activity levels and individual tailoring. An exercise  
31  
32 physiologist designs an individual program for the participant, delivers this in a face-to-face  
33  
34 workshop and monitors the physical activity program via the returned diaries and telephone  
35  
36 monitoring. For those not doing any regular PA at baseline, the target is 150 minutes/week  
37  
38 moderate intensity PA, with moderate intensity defined as a score of 10-12 on the Borg  
39  
40 Rating of Perceived Exertion scale (RPE; Borg, 1982). For those who are doing regular PA  
41  
42 but for less than 100 minutes/week, an additional 100 minutes/week is prescribed, and for  
43  
44 those meeting the target, an additional 50 minutes/week is prescribed. Printed material  
45  
46 guiding participants to increase their activity level with worksheets are also provided. A diary  
47  
48 in the format of a calendar returned monthly for 24 weeks is used to record PA and RPE to  
49  
50 assess PA and intensity adherence.  
51  
52  
53

#### 54 *Dietary session*



1  
2  
3 Participants at baseline who had unintentional weight loss of 5 kg or weight gain of 5 kg over  
4 the previous six months were seen by the dietitian. Furthermore, participants whose diets at  
5 baseline scored low on one or more of the subscales of the (ARFS) (vegetables <14, fruit <8,  
6 protein <4, grains <9, dairy <8, water <1) (Collins et al., 2015), were also seen by the  
7 dietitian. Dietary counselling was provided by a trained dietitian and overseen by the  
8 coordinating dietitian. During the one hour face-to-face counselling session, participants  
9 received individually tailored dietary advice and printed material explaining the diet in detail.  
10  
11

### 12 *Follow ups*

13  
14 Participants in the BBL-GP group are monitored through phone calls at week 4, 12 (14 for  
15 PA) and week 20 by the dietitian and exercise physiologist to monitor the progress and for  
16 reassurance. In addition, they receive a general booster session at 12 months with a phone  
17 call and a mailed out booklet summarising materials from the online modules. They are being  
18 asked to continue being active and follow a healthy eating plan after completion of the  
19 intervention.  
20  
21

### 22 *Online modules*

23  
24 Once participants in the BBL-GP group have received face-to-face PA and dietary  
25 counselling sessions, they are asked to log on to the trial website and complete one module  
26 per week, each taking approximately 30-40 minutes. The 12-week program is detailed in  
27 Table 2. The first 8 weeks include the completion of 8 educational and individually tailored  
28 behaviour change modules. In the remaining 4 weeks, participants undertake online activities  
29 focused on goal monitoring and revision of the modules materials. Tailoring of the six  
30 behaviour change modules (weeks 3-8) is conducted using an automated algorithm that  
31 presents content on the basis of whether or not the participant has a relevant risk factor, as  
32 well as on the basis of their responses to several questions measuring psychological  
33 determinants of behaviour. These questions are presented at the beginning of each of the  
34  
35  
36  
37  
38  
39  
40  
41  
42  
43  
44  
45  
46  
47  
48  
49  
50  
51  
52  
53  
54  
55  
56  
57  
58  
59  
60

1  
2  
3 behaviour change modules. For instance, a person who is classified as having a poor diet (e.g.  
4 lack of fish intake) on the basis of their responses on the ANU-ADRI, and who does not  
5 regard himself/herself as a role model to others with respect to their diet habits will not be  
6 presented with information focusing on becoming a role model to others.  
7  
8  
9  
10

11 The program is built in such a way that participants are only able to access the  
12 relevant component of the intervention at a given time. The modules become active, 1 per  
13 week, on the same day for the first 8 weeks. Participants are unable to access a newly  
14 activated module before completing the previously scheduled module. Each week,  
15 participants receive a notification email on the same day of the week alerting them when a  
16 new module has become active and a list of already activated modules that they have either  
17 not started or completed. Participants who are late completing modules will be followed up  
18 with an email from the project manager to identify if there is a reason (e.g. holidays, illness,  
19 work commitments) preventing their participation, and encouraging them to continue with the  
20 study. Compliance is recorded for each module if they are completed on time, delayed or not  
21 completed.  
22  
23  
24  
25  
26  
27  
28  
29  
30  
31  
32  
33  
34  
35

### 36 *Group 2: Lifestyle Modification Program (LMP)*

37

38 The lifestyle modification program (LMP), developed by NHC, is designed to enhance  
39 general wellbeing and improve lifestyle to reduce the risk of chronic disease. LMP is a six-  
40 week group program provided by various health professionals (dietitian, exercise physiologist,  
41 nurse practitioner, psychologist, pharmacist and sleep physician) providing information on  
42 basic nutrition, meal planning, physical activity, health conditions, motivation and goals,  
43 medications, and sleep. Every week, 2 sessions are provided on the same day with each  
44 session lasting an hour. The course is currently run by the NHC for their patients to assist  
45 them in improving their lifestyle and management of chronic disease so it is a real-life  
46 comparison condition. Attendance is recorded for compliance and motivation checking.  
47  
48  
49  
50  
51  
52  
53  
54  
55  
56  
57  
58  
59  
60

1  
2  
3 Although the LMP is a free nationally recognized program that is designed to provide  
4 individuals with tools to help manage chronic disease and maintain a healthy lifestyle,  
5  
6 evaluation of the program has not been carried out as yet.  
7  
8  
9

### 10 *Group 3: Active control/Email only*

11  
12 The active control group or email only group proceed with their normal activities and access  
13  
14 health services as required over the trial period. Participants in this group also receive weekly  
15  
16 emails containing links to various websites providing information on lifestyle risk factors and  
17  
18 disease management for a duration of 12 weeks. The weekly emails contain several links, and  
19  
20 participants are encouraged to spend approximately an hour each week browsing through the  
21  
22 material. The material is generally organized around the same themes as the ones included in  
23  
24 the BBL-GP program. An effort has been made to include links to relevant information and  
25  
26 educational material, but that otherwise does not include the use of identifiable behaviour-  
27  
28 change techniques which are the ‘active ingredient’ of the BBL-GP program. In addition,  
29  
30 other than providing participants with the weekly emails, no further contact is made with the  
31  
32 participants in this group, such as reminders and prompts that are provided to the BBL-GP  
33  
34 group.  
35  
36

### 37 *Masking*

38  
39  
40 To prevent performance bias, research staff conducting the assessments remain masked to  
41  
42 participants’ group allocation. The contact person for participants’ website queries, access  
43  
44 issues, and technical difficulties is independent of all baseline assessment data. All  
45  
46 participants are informed that they are being randomly allocated to one of three study groups  
47  
48 and that one group may be more effective than others. They are also notified at the start of the  
49  
50 study that one of these groups involves face-to-face group sessions which require them to  
51  
52 travel to NHC head office. Hence, the research team members who recruit participants,  
53  
54 conduct individual diet and physical activity sessions, and professionals who are involved in  
55  
56  
57  
58  
59  
60

1  
2  
3 the LMP are naturally able to tell which group they have been allocated to. Nurses who  
4  
5 conduct baseline and follow-up assessments are however masked to group allocation.  
6

#### 7 *Data management and monitoring*

8  
9 Data management is handled independently from the researchers who interpret the data. All  
10  
11 data are stored electronically and in an independent spreadsheet and SPSS data file, which is  
12  
13 only accessible by the researchers involved in this study.  
14

#### 15 *Statistical analyses*

16  
17 Statistical analyses will be based on an intention-to-treat approach. As applied in the previous  
18  
19 BBL project (Anstey et al., 2015), multiple imputation and mixed models will be applied to  
20  
21 analyse data. We hypothesise that the effectiveness of the intervention programs will be in  
22  
23 the following order: BBL-GP > LMP > active control. The hypothesis that BBL-GP will be  
24  
25 more effective than LMP is based on research showing that a tailored program is better than a  
26  
27 one size fits all group program in most cases (Kreuter, Oswald, Bull, & Clark, 2000). This is  
28  
29 also based on the previous BBL project where those in BBL groups improved more than  
30  
31 those in the control group. We will also adjust for compliance in completing the online  
32  
33 modules and following recommendations provided by the dietitian and exercise physiologist  
34  
35 (for BBL-GP group), or for attendance to weekly group sessions (for LMP group).  
36  
37  
38

#### 39 *Ethics and trial registration*

40  
41 The Human Research Ethics Committee at the Australian National University has approved  
42  
43 the study protocols and procedures (protocol #2016/157). This project has also been  
44  
45 registered at the Australian New Zealand Clinical Trials Registry (ACTRN:  
46  
47 12616000868482).  
48  
49

#### 50 *Adverse events*

51  
52 This study evaluates lifestyle intervention programs to reduce risk factors for AD. The target  
53  
54 population is adults in a primary care setting who have some of the known risk factors for  
55  
56  
57

1  
2  
3 dementia, but are at the time of the intervention, healthy and free of any dementia-related  
4 symptoms. We do not anticipate that participants will be placed at a greater risk than that  
5 associated with self-driven educational activities over the Internet. Medical assessments are  
6 done by the participants' usual nurses and doctors and if any abnormality is detected in their  
7 results, they are required to discuss these abnormalities with participants as usual. To address  
8 issues of potential fatigue, the assessments have been kept to a minimum length. In addition,  
9 all online and face-to-face sessions are designed in an interactive way and are limited to 1-  
10 hour sessions (LMP has 2 themed sessions per week and has a break between sessions). As  
11 mentioned above, all online modules are delivered in an individually tailored fashion to  
12 maximize relevance for each individual.  
13  
14  
15  
16  
17  
18  
19  
20  
21  
22  
23

#### 24 *Dissemination plan*

25  
26 Positive, neutral and negative results of the trial will be submitted to international peer-  
27 reviewed journals. In addition, results will be presented at national and international  
28 conferences relevant to the subject matters. Authorship will be allocated using the guidelines  
29 for authorship defined by the International Committees of Medical Journal Editors and  
30 depends on personal involvement.  
31  
32  
33  
34  
35  
36

#### 37 **Discussion**

38  
39 The project is currently under way as an evaluation of the efficacy of health promotion  
40 interventions in adults with risk factors for dementia. The program aims to reduce  
41 cardiometabolic risk and promote behaviours shown to protect against dementia. The trial,  
42 recruiting from a primary care setting has generated considerable interest, and to date,  
43 approximately half of the total target sample has been assessed and randomised into the  
44 intervention groups. We anticipate that all data collection will be completed by December  
45 2018. The results of the study are likely to form an evidence base for the feasibility of  
46 dementia risk reduction campaigns to lead to lifestyle changes and the reduction of dementia  
47  
48  
49  
50  
51  
52  
53  
54  
55  
56  
57  
58  
59  
60

1  
2  
3 risk factors at the population level. This trial will also support the feasibility of such  
4  
5 interventions being applied in primary care settings. Successful outcomes of the current trial  
6  
7 may lead to significant public health impact and benefits once the intervention is made  
8  
9 available at the population level pending positive results.  
10

### 11 **Conclusion**

12  
13 Interventions to reduce risk of developing dementia are needed as a cure is not available. This  
14  
15 project compares three different approaches to promote healthy lifestyles and to reduce risk  
16  
17 of developing dementia applied in a primary care setting. This unique trial demonstrates real  
18  
19 life application of dementia risk reduction intervention rather than more controlled but less  
20  
21 ecologically valid interventions typically tested in a research setting.  
22  
23  
24  
25  
26  
27  
28  
29  
30  
31  
32  
33  
34  
35  
36  
37  
38  
39  
40  
41  
42  
43  
44  
45  
46  
47  
48  
49  
50  
51  
52  
53  
54  
55  
56  
57  
58  
59  
60

## References

- Anstey, K. J., Bahar-Fuchs, A., Herath, P., Kim, S., Burns, R., Rebok, G. W., & Cherbuin, N. (2015). Body brain life: A randomized controlled trial of an online dementia risk reduction intervention in middle-aged adults at risk of Alzheimer's disease. *Alzheimer's & Dementia: Translational Research & Clinical Interventions*, *1*(1), 72-80. doi:<http://dx.doi.org/10.1016/j.trci.2015.04.003>
- Anstey, K. J., Bahar-Fuchs, A., Herath, P., Rebok, G. W., & Cherbuin, N. (2013). A 12-week multidomain intervention versus active control to reduce risk of Alzheimer's disease: study protocol for a randomized controlled trial. *Trials*, *14*, 60.
- Anstey, K. J., Cherbuin, N., & Herath, P. (2013). Development of a new method for assessing global risk of Alzheimer's disease for use in population health approaches to prevention. *Prev Sci*, *14*, 411-421.
- Anstey, K. J., Cherbuin, N., Herath, P., Qiu, C., Kuller, L. H., Lopez, O. L., . . . Fratiglioni, L. (2014). A self-report risk index to predict occurrence of dementia in three independent cohorts of older adults: the ANU-ADRI. *PLoS ONE*, *9*(1), e86141.
- Ashby-Mitchell, K., Burns, R., Shaw, J., & Anstey, K. J. (2017). Proportion of dementia in Australia explained by common modifiable risk factors. *Alzheimers Res Ther*, *9*(1), 11. doi:10.1186/s13195-017-0238-x
- Barnes, D., & Yaffe, K. (2011). The projected effect of risk factor reduction on Alzheimer's disease prevalence. *The Lancet Neurology*, *10*(9), 819-828.
- Blondell, S. J., Hammersley-Mather, R., & Veerman, J. L. (2014). Does physical activity prevent cognitive decline and dementia?: A systematic review and meta-analysis of longitudinal studies. *BMC Public Health*, *14*, 510. doi:10.1186/1471-2458-14-510
- Borg, G. A. (1982). Psychophysical bases of perceived exertion. *Med Sci Sports Exerc*, *14*(5), 377-381.

- 1  
2  
3 Brouwer, B. G., van der Graaf, Y., Soedamah-Muthu, S. S., Wassink, A. M., & Visseren, F.  
4  
5 L. (2010). Leisure-time physical activity and risk of type 2 diabetes in patients with  
6  
7 established vascular disease or poorly controlled vascular risk factors. *Diabetes Res*  
8  
9 *Clin Pract*, 87(3), 372-378. doi:10.1016/j.diabres.2009.12.001  
10  
11 Buysse, D. J., Reynolds, C. F., Monk, T. H., Berman, S. R., & Kupfer, D. J. (1989). The  
12  
13 Pittsburgh Sleep Quality Index (PSQI): A new instrument for psychiatric research and  
14  
15 practice. *Psychiatry Research*, 28(2), 193-213.  
16  
17  
18 Chen, L., Magliano, D. J., Balkau, B., Colagiuri, S., Zimmet, P. Z., Tonkin, A. M., . . . Shaw,  
19  
20 J. E. (2010). AUSDRISK: an Australian Type 2 Diabetes Risk Assessment Tool based  
21  
22 on demographic, lifestyle and simple anthropometric measures. *Med J Aust*, 192, 197-  
23  
24 202.  
25  
26  
27 Collins, C. E., Burrows, T. L., Rollo, M. E., Boggess, M. M., Watson, J. F., Guest, M., . . .  
28  
29 Hutchesson, M. J. (2015). The comparative validity and reproducibility of a diet  
30  
31 quality index for adults: the Australian Recommended Food Score. *Nutrients*, 7(2),  
32  
33 785-798. doi:10.3390/nu7020785  
34  
35  
36 Craig, C. L., Marshall, A. L., Sjostrom, M., Bauman, A. E., Booth, M. L., Ainsworth, B.  
37  
38 E., . . . Oja, P. (2003). International physical activity questionnaire: 12-country  
39  
40 reliability and validity. *Med Sci Sports Exerc*, 35(8), 1381-1395.  
41  
42 doi:10.1249/01.mss.0000078924.61453.fb  
43  
44  
45 Cyarto, E. V., Cox, K. L., Almeida, O. P., Flicker, L., Ames, D., Byrne, G., . . .  
46  
47 Lautenschlager, N. T. (2010). The fitness for the Ageing Brain Study II (FABS II):  
48  
49 protocol for a randomized controlled clinical trial evaluating the effect of physical  
50  
51 activity on cognitive function in patients with Alzheimer's disease. *Trials*, 11, 120.  
52  
53 doi:10.1186/1745-6215-11-120  
54  
55  
56  
57  
58  
59  
60



- 1  
2  
3 Exercise & Sports Science Australia. (2011). Adult pre-exercise screening system.  
4  
5 Retrieved from <https://www.essa.org.au/for-gps/adult-pre-exercise-screening-system/>  
6  
7 Folstein, M. F., Folstein, S. E., & McHugh, P. R. (1975). "Mini-mental state". A practical  
8  
9 method for grading the cognitive state of patients for the clinician. *J Psychiatr Res*,  
10  
11 *12*(3), 189-198.  
12  
13 Kim, S., Cherbuin, N., & Anstey, K. J. (2016). Assessing reliability of short and tick box  
14  
15 forms of the ANU-ADRI: Convenient alternatives of a self-report Alzheimer's disease  
16  
17 risk assessment. *Alzheimer's & Dementia: Translational Research & Clinical*  
18  
19 *Interventions*, *2*(2), 93-98. doi:<http://dx.doi.org/10.1016/j.trci.2016.03.001>  
20  
21  
22 Kreuter, M. W., Oswald, D. L., Bull, F. C., & Clark, E. M. (2000). Are tailored health  
23  
24 education materials always more effective than non-tailored materials? *Health*  
25  
26 *Education Research*, *15*(3), 305-315.  
27  
28  
29 Lautenschlager, N. T., Cox, K. L., Flicker, L., Foster, J. K., van Bockxmeer, F. M., Xiao,  
30  
31 J., . . . Almeida, O. P. (2008). Effect of physical activity on cognitive function in older  
32  
33 adults at risk for Alzheimer disease: a randomized trial. *JAMA*, *300*, 1027-1037.  
34  
35  
36 Locke, E. A. (1996). Motivation through conscious goal setting. *Applied and Preventive*  
37  
38 *Psychology*, *5*(2), 117-124. doi:[http://dx.doi.org/10.1016/S0962-1849\(96\)80005-9](http://dx.doi.org/10.1016/S0962-1849(96)80005-9)  
39  
40  
41 Mammen, G., & Faulkner, G. (2013). Physical activity and the prevention of depression: a  
42  
43 systematic review of prospective studies. *Am J Prev Med*, *45*(5), 649-657.  
44  
45 doi:10.1016/j.amepre.2013.08.001  
46  
47  
48 Middleton, K. R., Anton, S. D., & Perri, M. G. (2013). Long-term Adherence to Health  
49  
50 Behavior Change. *American Journal of Lifestyle Medicine*, *7*(6), 395-404.  
51  
52  
53 National Health and Medical Research Council. (2003). *Australian Guide to Healthy Eating*.  
54  
55 Retrieved from Canberra:  
56  
57  
58  
59  
60

- 1  
2  
3 National Health and Medical Research Council. (2013). *Australian Dietary Guidelines*.  
4  
5 Retrieved from Canberra:  
6  
7 Ngandu, T., Lehtisalo, J., Solomon, A., Levälähti, E., Ahtiluoto, S., Antikainen, R., . . .  
8  
9 Kivipelto, M. (2015). A 2 year multidomain intervention of diet, exercise, cognitive  
10  
11 training, and vascular risk monitoring versus control to prevent cognitive decline in  
12  
13 at-risk elderly people (FINGER): a randomised controlled trial. *The Lancet*,  
14  
15 385(9984), 2255-2263. doi:10.1016/S0140-6736(15)60461-5  
16  
17  
18 Northey, J. M., Cherbuin, N., Pumpa, K. L., Smee, D. J., & Rattray, B. (2017). Exercise  
19  
20 interventions for cognitive function in adults older than 50: a systematic review with  
21  
22 meta-analysis. *British Journal of Sports and Medicine*. doi:10.1136/bjsports-2016-  
23  
24 096587  
25  
26  
27 Prince, M., Albanese, E., Guerchet, M., & Prina, M. (2014). *World Alzheimer Report 2014:*  
28  
29 *Dementia and Risk Reduction. An analysis of protective and modifiable factors*.  
30  
31 Retrieved from London:  
32  
33 <http://www.alz.co.uk/research/WorldAlzheimerReport2014.pdf>  
34  
35  
36 Radloff, L. (1977). The CES-D scale: A self report depression scale for research in the  
37  
38 general population. *Applied Psychological Measurement, 1*, 385-401.  
39  
40 Richard, E., Van den Heuvel, E., van Charante, E. P. M., Achthoven, L., Vermeulen, M.,  
41  
42 Bindels, P. J., & Van Gool, W. A. (2009). Prevention of Dementia by Intensive  
43  
44 Vascular Care (PreDIVA) A Cluster-randomized Trial in Progress. *Alzheimer Disease*  
45  
46 *& Associated Disorders, 23*(3), 198-204.  
47  
48  
49 Robinson, L., Tang, E., & Taylor, J.-P. (2015). Dementia: timely diagnosis and early  
50  
51 intervention. *BMJ : British Medical Journal, 350*. doi:10.1136/bmj.h3029  
52  
53 Santos, C. Y., Snyder, P. J., Wu, W.-C., Zhang, M., Echeverria, A., & Alber, J. (2017).  
54  
55 Pathophysiologic relationship between Alzheimer's disease, cerebrovascular disease,  
56  
57  
58  
59  
60

1  
2  
3 and cardiovascular risk: A review and synthesis. *Alzheimer's & dementia: Diagnosis,*  
4  
5 *Assessment & Disease Monitoring*, 7, 69-87.

6  
7 Snell, W. E., Jr., & Johnson, G. (1997). The Multidimensional Health Questionnaire.  
8  
9 *American Journal of Health Behavior*, 21, 33-42.

10  
11 The Department of Health. (2013). National primary health care strategic framework:  
12  
13 Primary health care in Australia. Retrieved from  
14  
15 <http://www.health.gov.au/internet/publications/publishing.nsf/Content/NPHC->  
16  
17 [Strategic-Framework~phc-australia](http://www.health.gov.au/internet/publications/publishing.nsf/Content/NPHC-)

18  
19  
20 Ware, J., Jr., Kosinski, M., & Keller, S. D. (1996). A 12-Item Short-Form Health Survey:  
21  
22 construction of scales and preliminary tests of reliability and validity. *Med Care*,  
23  
24 34(3), 220-233.

25  
26 Wilson, P. W. F., D'Agostino, R. B., Levy, D., Belanger, A. M., Silbershatz, H., & Kannel,  
27  
28 W. B. (1998). Prediction of Coronary Heart Disease Using Risk Factor Categories.  
29  
30 *Circulation*, 97(18), 1837-1847. doi:10.1161/01.cir.97.18.1837  
31  
32  
33  
34  
35  
36  
37  
38  
39  
40  
41  
42  
43  
44  
45  
46  
47  
48  
49  
50  
51  
52  
53  
54  
55  
56  
57  
58  
59  
60

### **Authors' contributions**

KJA conceived the study and built relationship with NHC. KJA, NC, SK developed the overall design of the intervention. NL and KC designed the implementation of the physical activity related intervention. CD and KJA designed the statistical analysis plan for the protocol. DP and GR contributed knowledge of primary care setting and advised on implementing the intervention in a GP clinic. ST designed the implementation of the dietary intervention. NC and SK managed the implementation of the online component in the dedicated web portal. All authors wrote the study protocol and critically reviewed the manuscript.

### **Funding statement**

This work was supported by National Health and Medical Research Council (NHMRC) Centre of Research Excellence in Cognitive Health and development of BBL-GP was funded by NHMRC Dementia Collaborative Research Centres.

### **Acknowledgements**

The investigators acknowledge the work of staff at the National Health Co-op and research staffs at the Centre for Research on Ageing, Health and Wellbeing. The investigators would particularly like to acknowledge the valued contribution of the trial participants.

### **Competing interests**

None declared.

1  
2  
3  
4  
5  
6  
7  
8  
9  
10  
11  
12  
13  
14  
15  
16  
17  
18  
19  
20  
21  
22  
23  
24  
25  
26  
27  
28  
29  
30  
31  
32  
33  
34  
35  
36  
37  
38  
39  
40  
41  
42  
43  
44  
45  
46  
47

Table 1. Assessment measures at the baseline and follow up evaluations

| Assessment measure       | Baseline | Immediate follow up<br>(Week 7 for LMP and<br>week 13 for BBL-GP<br>and active control<br>group) | Week 18 | Week 36 | Week 62 |
|--------------------------|----------|--------------------------------------------------------------------------------------------------|---------|---------|---------|
| Screening                |          |                                                                                                  |         |         |         |
| APSS                     | √        |                                                                                                  |         |         |         |
| MMSE (if 60+)            | √        |                                                                                                  |         |         |         |
| Questionnaires           |          |                                                                                                  |         |         |         |
| ANU-ADRI                 | √        | √                                                                                                | √       | √       | √       |
| Sleep Quality Assessment | √        | √                                                                                                | √       | √       | √       |
| Diet questionnaire       | √        | √                                                                                                | √       | √       | √       |
| SF-12                    | √        | √                                                                                                | √       | √       | √       |
| MHQ                      | √        |                                                                                                  |         |         |         |

|                                                            |   |  |   |   |   |
|------------------------------------------------------------|---|--|---|---|---|
| Cognitive measures                                         |   |  |   |   |   |
| Trails A + B                                               | √ |  | √ | √ | √ |
| Digit symbol matching                                      | √ |  | √ | √ | √ |
| Physical and medical evaluation<br>(by doctors and nurses) |   |  |   |   |   |
| MVPA                                                       | √ |  | √ | √ | √ |
| Blood pressure                                             | √ |  | √ | √ | √ |
| Height, cm                                                 | √ |  |   |   |   |
| Weight, kg                                                 | √ |  | √ | √ | √ |
| Waist and hip, cm                                          | √ |  | √ | √ | √ |
| Body Composition                                           | √ |  | √ | √ | √ |
| Framingham coronary heart                                  | √ |  | √ | √ | √ |
| AUSDRISK                                                   | √ |  | √ | √ | √ |

1  
2  
3  
4  
5  
6  
7  
8  
9  
10  
11  
12  
13  
14  
15  
16  
17  
18  
19  
20  
21  
22  
23  
24  
25  
26  
27  
28  
29  
30  
31  
32  
33  
34  
35  
36  
37  
38  
39  
40  
41  
42  
43  
44  
45  
46  
47

Note: ANU-ADRI: Australian National University – Alzheimer’s Disease Risk Index; SF-12: SF-12 Health Survey; APSS: Adults Pre-exercise Screening System; MHQ: Multidimensional Health Questionnaire; MMSE: Mini-Mental State Examination; MVPA: Moderate-vigorous Physical Activity; AUSDRISK: Australian type 2 diabetes risk assessment tool.

For peer review only

Table 2: Description of the 12-week online program delivered through the Body Brain Life – GP (BBL-GP) website

| Week | Activity                                   | Description                                                                                                                                                                                                                                                                                                                                                                                                                                                                                                                                                                                                                       |
|------|--------------------------------------------|-----------------------------------------------------------------------------------------------------------------------------------------------------------------------------------------------------------------------------------------------------------------------------------------------------------------------------------------------------------------------------------------------------------------------------------------------------------------------------------------------------------------------------------------------------------------------------------------------------------------------------------|
| 1    | Module 1: Dementia literacy                | The first module focuses on providing participants with general information about dementia including types, causes, prevalence, social and economic impact, symptoms, brain function, treatment, risk factors (modifiable and non-modifiable), and prevention. This module serves as an introduction to the subsequent modules.                                                                                                                                                                                                                                                                                                   |
| 2    | Module 2: Dementia risk factors            | This module is aimed at building awareness and knowledge of the various health conditions associated with an increased risk of Alzheimer's dementia (AD). Specifically, this module provides details regarding the association between AD and several medical conditions (abnormal weight, high cholesterol, diabetes, hypertension, and depression), as well as lifestyle factors (alcohol use and smoking, physical activity, nutrition, stroke and head injury, mental health, social and cognitive engagement). The module also briefly covers non-modifiable risk factors that contribute to AD, including age and genetics. |
| 3    | Module 3: BBL FIT - physical activity      | This is a theory-driven, individually-tailored module that aims to help participants incorporate regular physical activity into their daily routine and reduce sedentary behaviour by focusing on increasing endurance, strength, balance, and flexibility. This module targets several barriers to engaging in physical activity, such as increasing motivation, creating opportunities to exercise, and developing a social network that supports physical activity goals.                                                                                                                                                      |
| 4    | Module 4: BBL nutrition                    | This is a theory-driven, individually-tailored module aimed at helping people develop healthy dietary habits. This module targets the risk associated with abnormal weight, and the protective effects associated with fish intake and other dietary components.                                                                                                                                                                                                                                                                                                                                                                  |
| 5    | Module 5: BBL health self-management       | This is a theory-driven, individually-tailored module aimed at increasing participants' health monitoring and management of chronic health conditions. Because several chronic health conditions are associated with increased risk for dementia, prevention and appropriate management of such conditions is also likely to be protective against dementia.                                                                                                                                                                                                                                                                      |
| 6    | Module 6: BBL Think – cognitive engagement | This is a theory-driven, individually-tailored module aimed at increasing participants' levels of engagement with mentally stimulating activities, which is a protective factor against dementia.                                                                                                                                                                                                                                                                                                                                                                                                                                 |



1  
2  
3  
4  
5  
6  
7  
8  
9  
10  
11  
12  
13  
14  
15  
16  
17  
18  
19  
20  
21  
22  
23  
24  
25  
26  
27  
28  
29  
30  
31  
32  
33  
34  
35  
36  
37  
38  
39  
40  
41  
42  
43  
44  
45  
46  
47

|   |                                           |                                                                                                                                                                                                                                                                                                                                           |
|---|-------------------------------------------|-------------------------------------------------------------------------------------------------------------------------------------------------------------------------------------------------------------------------------------------------------------------------------------------------------------------------------------------|
| 7 | Module 7: BBL connect – social engagement | This is a theory-driven, individually-tailored module aimed at increasing participants’ levels of social engagement. The module targets the risk factor for dementia associated with loneliness and depression, and the protective effects of regular social engagement.                                                                  |
| 8 | Module 8: BBL mood                        | This is a theory-driven, individually-tailored module that aims to help participants monitor and maintain good mental health. The module targets risk factors for dementia associated with mental health and mood, focusing on depression and anxiety. Information is provided on symptoms, types, treatment, and tips for managing mood. |
| 9 | 9 to 12 Self-guided online activities     | During these sessions, participants are encouraged to engage in a range of online activities for 1 h, including accessing the many tools they have accumulated during the first 7 weeks. Examples include the goal-setting tool, behaviour-monitoring tool, unhelpful thoughts monitoring tool, videos, and so on.                        |

For peer review only

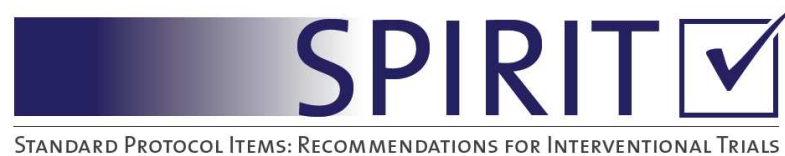

SPIRIT 2013 Checklist: Recommended items to address in a clinical trial protocol and related documents\*

| Section/item                      | Item No | Description                                                                                                                                                                                                                                                                              | Addressed on page number |
|-----------------------------------|---------|------------------------------------------------------------------------------------------------------------------------------------------------------------------------------------------------------------------------------------------------------------------------------------------|--------------------------|
| <b>Administrative information</b> |         |                                                                                                                                                                                                                                                                                          |                          |
| Title                             | 1       | Descriptive title identifying the study design, population, interventions, and, if applicable, trial acronym                                                                                                                                                                             | ___1___                  |
| Trial registration                | 2a      | Trial identifier and registry name. If not yet registered, name of intended registry                                                                                                                                                                                                     | ___4, 18___              |
|                                   | 2b      | All items from the World Health Organization Trial Registration Data Set                                                                                                                                                                                                                 | ___N/A___                |
| Protocol version                  | 3       | Date and version identifier                                                                                                                                                                                                                                                              | ___N/A___                |
| Funding                           | 4       | Sources and types of financial, material, and other support                                                                                                                                                                                                                              | ___26___                 |
| Roles and responsibilities        | 5a      | Names, affiliations, and roles of protocol contributors                                                                                                                                                                                                                                  | ___1, 26___              |
|                                   | 5b      | Name and contact information for the trial sponsor                                                                                                                                                                                                                                       | ___N/A___                |
|                                   | 5c      | Role of study sponsor and funders, if any, in study design; collection, management, analysis, and interpretation of data; writing of the report; and the decision to submit the report for publication, including whether they will have ultimate authority over any of these activities | ___N/A___                |
|                                   | 5d      | Composition, roles, and responsibilities of the coordinating centre, steering committee, endpoint adjudication committee, data management team, and other individuals or groups overseeing the trial, if applicable (see Item 21a for data monitoring committee)                         | ___N/A___                |

1  
2  
3  
4  
5  
6  
7  
8  
9  
10  
11  
12  
13  
14  
15  
16  
17  
18  
19  
20  
21  
22  
23  
24  
25  
26  
27  
28  
29  
30  
31  
32  
33  
34  
35  
36  
37  
38  
39  
40  
41  
42  
43  
44  
45  
46  
47

**Introduction**

|                          |    |                                                                                                                                                                                                           |     |
|--------------------------|----|-----------------------------------------------------------------------------------------------------------------------------------------------------------------------------------------------------------|-----|
| Background and rationale | 6a | Description of research question and justification for undertaking the trial, including summary of relevant studies (published and unpublished) examining benefits and harms for each intervention        | 5-8 |
|                          | 6b | Explanation for choice of comparators                                                                                                                                                                     | 7-8 |
| Objectives               | 7  | Specific objectives or hypotheses                                                                                                                                                                         | 7   |
| Trial design             | 8  | Description of trial design including type of trial (eg, parallel group, crossover, factorial, single group), allocation ratio, and framework (eg, superiority, equivalence, noninferiority, exploratory) | 7   |

**Methods: Participants, interventions, and outcomes**

|                      |     |                                                                                                                                                                                                                                                                                                                                                                                |           |
|----------------------|-----|--------------------------------------------------------------------------------------------------------------------------------------------------------------------------------------------------------------------------------------------------------------------------------------------------------------------------------------------------------------------------------|-----------|
| Study setting        | 9   | Description of study settings (eg, community clinic, academic hospital) and list of countries where data will be collected. Reference to where list of study sites can be obtained                                                                                                                                                                                             | 8         |
| Eligibility criteria | 10  | Inclusion and exclusion criteria for participants. If applicable, eligibility criteria for study centres and individuals who will perform the interventions (eg, surgeons, psychotherapists)                                                                                                                                                                                   | 9-11      |
| Interventions        | 11a | Interventions for each group with sufficient detail to allow replication, including how and when they will be administered                                                                                                                                                                                                                                                     | 13-17     |
|                      | 11b | Criteria for discontinuing or modifying allocated interventions for a given trial participant (eg, drug dose change in response to harms, participant request, or improving/worsening disease)                                                                                                                                                                                 | N/A       |
|                      | 11c | Strategies to improve adherence to intervention protocols, and any procedures for monitoring adherence (eg, drug tablet return, laboratory tests)                                                                                                                                                                                                                              | 14-16     |
|                      | 11d | Relevant concomitant care and interventions that are permitted or prohibited during the trial                                                                                                                                                                                                                                                                                  | 14-17     |
| Outcomes             | 12  | Primary, secondary, and other outcomes, including the specific measurement variable (eg, systolic blood pressure), analysis metric (eg, change from baseline, final value, time to event), method of aggregation (eg, median, proportion), and time point for each outcome. Explanation of the clinical relevance of chosen efficacy and harm outcomes is strongly recommended | 11-13     |
| Participant timeline | 13  | Time schedule of enrolment, interventions (including any run-ins and washouts), assessments, and visits for participants. A schematic diagram is highly recommended (see Figure)                                                                                                                                                                                               | 11, 27-29 |

|   |             |    |                                                                                                                                                                                       |          |
|---|-------------|----|---------------------------------------------------------------------------------------------------------------------------------------------------------------------------------------|----------|
| 1 |             |    |                                                                                                                                                                                       |          |
| 2 |             |    |                                                                                                                                                                                       |          |
| 3 | Sample size | 14 | Estimated number of participants needed to achieve study objectives and how it was determined, including clinical and statistical assumptions supporting any sample size calculations | ___10___ |
| 4 |             |    |                                                                                                                                                                                       |          |
| 5 | Recruitment | 15 | Strategies for achieving adequate participant enrolment to reach target sample size                                                                                                   | ___9___  |
| 6 |             |    |                                                                                                                                                                                       |          |
| 7 |             |    |                                                                                                                                                                                       |          |

### 8 **Methods: Assignment of interventions (for controlled trials)**

#### 9 Allocation:

|    |                                  |     |                                                                                                                                                                                                                                                                                                                                                          |             |
|----|----------------------------------|-----|----------------------------------------------------------------------------------------------------------------------------------------------------------------------------------------------------------------------------------------------------------------------------------------------------------------------------------------------------------|-------------|
| 10 |                                  |     |                                                                                                                                                                                                                                                                                                                                                          |             |
| 11 |                                  |     |                                                                                                                                                                                                                                                                                                                                                          |             |
| 12 | Sequence generation              | 16a | Method of generating the allocation sequence (eg, computer-generated random numbers), and list of any factors for stratification. To reduce predictability of a random sequence, details of any planned restriction (eg, blocking) should be provided in a separate document that is unavailable to those who enrol participants or assign interventions | ___13___    |
| 13 |                                  |     |                                                                                                                                                                                                                                                                                                                                                          |             |
| 14 |                                  |     |                                                                                                                                                                                                                                                                                                                                                          |             |
| 15 |                                  |     |                                                                                                                                                                                                                                                                                                                                                          |             |
| 16 |                                  |     |                                                                                                                                                                                                                                                                                                                                                          |             |
| 17 | Allocation concealment mechanism | 16b | Mechanism of implementing the allocation sequence (eg, central telephone; sequentially numbered, opaque, sealed envelopes), describing any steps to conceal the sequence until interventions are assigned                                                                                                                                                | ___13___    |
| 18 |                                  |     |                                                                                                                                                                                                                                                                                                                                                          |             |
| 19 |                                  |     |                                                                                                                                                                                                                                                                                                                                                          |             |
| 20 |                                  |     |                                                                                                                                                                                                                                                                                                                                                          |             |
| 21 | Implementation                   | 16c | Who will generate the allocation sequence, who will enrol participants, and who will assign participants to interventions                                                                                                                                                                                                                                | ___13___    |
| 22 |                                  |     |                                                                                                                                                                                                                                                                                                                                                          |             |
| 23 |                                  |     |                                                                                                                                                                                                                                                                                                                                                          |             |
| 24 | Blinding (masking)               | 17a | Who will be blinded after assignment to interventions (eg, trial participants, care providers, outcome assessors, data analysts), and how                                                                                                                                                                                                                | ___17-18___ |
| 25 |                                  |     |                                                                                                                                                                                                                                                                                                                                                          |             |
| 26 |                                  |     |                                                                                                                                                                                                                                                                                                                                                          |             |
| 27 |                                  | 17b | If blinded, circumstances under which unblinding is permissible, and procedure for revealing a participant's allocated intervention during the trial                                                                                                                                                                                                     | ___17___    |
| 28 |                                  |     |                                                                                                                                                                                                                                                                                                                                                          |             |
| 29 |                                  |     |                                                                                                                                                                                                                                                                                                                                                          |             |
| 30 |                                  |     |                                                                                                                                                                                                                                                                                                                                                          |             |

### 31 **Methods: Data collection, management, and analysis**

|    |                         |     |                                                                                                                                                                                                                                                                                                                                                                                                              |             |
|----|-------------------------|-----|--------------------------------------------------------------------------------------------------------------------------------------------------------------------------------------------------------------------------------------------------------------------------------------------------------------------------------------------------------------------------------------------------------------|-------------|
| 32 |                         |     |                                                                                                                                                                                                                                                                                                                                                                                                              |             |
| 33 | Data collection methods | 18a | Plans for assessment and collection of outcome, baseline, and other trial data, including any related processes to promote data quality (eg, duplicate measurements, training of assessors) and a description of study instruments (eg, questionnaires, laboratory tests) along with their reliability and validity, if known. Reference to where data collection forms can be found, if not in the protocol | ___11___    |
| 34 |                         |     |                                                                                                                                                                                                                                                                                                                                                                                                              |             |
| 35 |                         |     |                                                                                                                                                                                                                                                                                                                                                                                                              |             |
| 36 |                         |     |                                                                                                                                                                                                                                                                                                                                                                                                              |             |
| 37 |                         |     |                                                                                                                                                                                                                                                                                                                                                                                                              |             |
| 38 |                         | 18b | Plans to promote participant retention and complete follow-up, including list of any outcome data to be collected for participants who discontinue or deviate from intervention protocols                                                                                                                                                                                                                    | ___16-17___ |
| 39 |                         |     |                                                                                                                                                                                                                                                                                                                                                                                                              |             |
| 40 |                         |     |                                                                                                                                                                                                                                                                                                                                                                                                              |             |
| 41 |                         |     |                                                                                                                                                                                                                                                                                                                                                                                                              |             |
| 42 |                         |     |                                                                                                                                                                                                                                                                                                                                                                                                              |             |
| 43 |                         |     |                                                                                                                                                                                                                                                                                                                                                                                                              |             |
| 44 |                         |     |                                                                                                                                                                                                                                                                                                                                                                                                              |             |
| 45 |                         |     |                                                                                                                                                                                                                                                                                                                                                                                                              |             |
| 46 |                         |     |                                                                                                                                                                                                                                                                                                                                                                                                              |             |
| 47 |                         |     |                                                                                                                                                                                                                                                                                                                                                                                                              |             |

1  
2  
3  
4  
5  
6  
7  
8  
9  
10  
11  
12  
13  
14  
15  
16  
17  
18  
19  
20  
21  
22  
23  
24  
25  
26  
27  
28  
29  
30  
31  
32  
33  
34  
35  
36  
37  
38  
39  
40  
41  
42  
43  
44  
45  
46  
47

Data management 19 Plans for data entry, coding, security, and storage, including any related processes to promote data quality (eg, double data entry; range checks for data values). Reference to where details of data management procedures can be found, if not in the protocol \_\_\_\_\_18\_\_\_\_\_

Statistical methods 20a Statistical methods for analysing primary and secondary outcomes. Reference to where other details of the statistical analysis plan can be found, if not in the protocol \_\_\_\_\_18\_\_\_\_\_

20b Methods for any additional analyses (eg, subgroup and adjusted analyses) \_\_\_\_\_18\_\_\_\_\_

20c Definition of analysis population relating to protocol non-adherence (eg, as randomised analysis), and any statistical methods to handle missing data (eg, multiple imputation) \_\_\_\_\_18\_\_\_\_\_

**Methods: Monitoring**

Data monitoring 21a Composition of data monitoring committee (DMC); summary of its role and reporting structure; statement of whether it is independent from the sponsor and competing interests; and reference to where further details about its charter can be found, if not in the protocol. Alternatively, an explanation of why a DMC is not needed \_\_\_\_\_N/A\_\_\_\_\_

21b Description of any interim analyses and stopping guidelines, including who will have access to these interim results and make the final decision to terminate the trial \_\_\_\_\_N/A\_\_\_\_\_

Harms 22 Plans for collecting, assessing, reporting, and managing solicited and spontaneously reported adverse events and other unintended effects of trial interventions or trial conduct \_\_\_\_\_18-19\_\_\_\_\_

Auditing 23 Frequency and procedures for auditing trial conduct, if any, and whether the process will be independent from investigators and the sponsor \_\_\_\_\_N/A\_\_\_\_\_

**Ethics and dissemination**

Research ethics approval 24 Plans for seeking research ethics committee/institutional review board (REC/IRB) approval \_\_\_\_\_18\_\_\_\_\_

Protocol amendments 25 Plans for communicating important protocol modifications (eg, changes to eligibility criteria, outcomes, analyses) to relevant parties (eg, investigators, REC/IRBs, trial participants, trial registries, journals, regulators) \_\_\_\_\_18\_\_\_\_\_

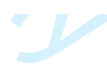

|    |                               |     |                                                                                                                                                                                                                                                                                     |             |
|----|-------------------------------|-----|-------------------------------------------------------------------------------------------------------------------------------------------------------------------------------------------------------------------------------------------------------------------------------------|-------------|
| 1  |                               |     |                                                                                                                                                                                                                                                                                     |             |
| 2  |                               |     |                                                                                                                                                                                                                                                                                     |             |
| 3  | Consent or assent             | 26a | Who will obtain informed consent or assent from potential trial participants or authorised surrogates, and how (see Item 32)                                                                                                                                                        | ___9___     |
| 4  |                               |     |                                                                                                                                                                                                                                                                                     |             |
| 5  |                               |     |                                                                                                                                                                                                                                                                                     |             |
| 6  |                               | 26b | Additional consent provisions for collection and use of participant data and biological specimens in ancillary studies, if applicable                                                                                                                                               | ___N/A___   |
| 7  |                               |     |                                                                                                                                                                                                                                                                                     |             |
| 8  | Confidentiality               | 27  | How personal information about potential and enrolled participants will be collected, shared, and maintained in order to protect confidentiality before, during, and after the trial                                                                                                | ___9, 18___ |
| 9  |                               |     |                                                                                                                                                                                                                                                                                     |             |
| 10 |                               |     |                                                                                                                                                                                                                                                                                     |             |
| 11 | Declaration of interests      | 28  | Financial and other competing interests for principal investigators for the overall trial and each study site                                                                                                                                                                       | ___26___    |
| 12 |                               |     |                                                                                                                                                                                                                                                                                     |             |
| 13 |                               |     |                                                                                                                                                                                                                                                                                     |             |
| 14 | Access to data                | 29  | Statement of who will have access to the final trial dataset, and disclosure of contractual agreements that limit such access for investigators                                                                                                                                     | ___18___    |
| 15 |                               |     |                                                                                                                                                                                                                                                                                     |             |
| 16 |                               |     |                                                                                                                                                                                                                                                                                     |             |
| 17 | Ancillary and post-trial care | 30  | Provisions, if any, for ancillary and post-trial care, and for compensation to those who suffer harm from trial participation                                                                                                                                                       | ___N/A___   |
| 18 |                               |     |                                                                                                                                                                                                                                                                                     |             |
| 19 |                               |     |                                                                                                                                                                                                                                                                                     |             |
| 20 | Dissemination policy          | 31a | Plans for investigators and sponsor to communicate trial results to participants, healthcare professionals, the public, and other relevant groups (eg, via publication, reporting in results databases, or other data sharing arrangements), including any publication restrictions | ___19___    |
| 21 |                               |     |                                                                                                                                                                                                                                                                                     |             |
| 22 |                               |     |                                                                                                                                                                                                                                                                                     |             |
| 23 |                               |     |                                                                                                                                                                                                                                                                                     |             |
| 24 |                               |     |                                                                                                                                                                                                                                                                                     |             |
| 25 |                               | 31b | Authorship eligibility guidelines and any intended use of professional writers                                                                                                                                                                                                      | ___19___    |
| 26 |                               |     |                                                                                                                                                                                                                                                                                     |             |
| 27 |                               | 31c | Plans, if any, for granting public access to the full protocol, participant-level dataset, and statistical code                                                                                                                                                                     | ___N/A___   |
| 28 |                               |     |                                                                                                                                                                                                                                                                                     |             |
| 29 | <b>Appendices</b>             |     |                                                                                                                                                                                                                                                                                     |             |
| 30 |                               |     |                                                                                                                                                                                                                                                                                     |             |
| 31 | Informed consent materials    | 32  | Model consent form and other related documentation given to participants and authorised surrogates                                                                                                                                                                                  | ___N/A___   |
| 32 |                               |     |                                                                                                                                                                                                                                                                                     |             |
| 33 |                               |     |                                                                                                                                                                                                                                                                                     |             |
| 34 | Biological specimens          | 33  | Plans for collection, laboratory evaluation, and storage of biological specimens for genetic or molecular analysis in the current trial and for future use in ancillary studies, if applicable                                                                                      | ___N/A___   |
| 35 |                               |     |                                                                                                                                                                                                                                                                                     |             |
| 36 |                               |     |                                                                                                                                                                                                                                                                                     |             |

37 \*It is strongly recommended that this checklist be read in conjunction with the SPIRIT 2013 Explanation & Elaboration for important clarification on the items.  
 38 Amendments to the protocol should be tracked and dated. The SPIRIT checklist is copyrighted by the SPIRIT Group under the Creative Commons  
 39 "[Attribution-NonCommercial-NoDerivs 3.0 Unported](https://creativecommons.org/licenses/by-nc-nd/3.0/)" license.  
 40

# BMJ Open

## Protocol for a pragmatic randomised controlled trial of Body Brain Life – GP and a Lifestyle Modification Program to decrease dementia risk exposure in a primary care setting

|                                 |                                                                                                                                                                                                                                                                                                                                                                                                                                                                                                                                                                                                                                                                                                                                                                                                                                                                                                                        |
|---------------------------------|------------------------------------------------------------------------------------------------------------------------------------------------------------------------------------------------------------------------------------------------------------------------------------------------------------------------------------------------------------------------------------------------------------------------------------------------------------------------------------------------------------------------------------------------------------------------------------------------------------------------------------------------------------------------------------------------------------------------------------------------------------------------------------------------------------------------------------------------------------------------------------------------------------------------|
| Journal:                        | <i>BMJ Open</i>                                                                                                                                                                                                                                                                                                                                                                                                                                                                                                                                                                                                                                                                                                                                                                                                                                                                                                        |
| Manuscript ID                   | bmjopen-2017-019329.R1                                                                                                                                                                                                                                                                                                                                                                                                                                                                                                                                                                                                                                                                                                                                                                                                                                                                                                 |
| Article Type:                   | Protocol                                                                                                                                                                                                                                                                                                                                                                                                                                                                                                                                                                                                                                                                                                                                                                                                                                                                                                               |
| Date Submitted by the Author:   | 08-Dec-2017                                                                                                                                                                                                                                                                                                                                                                                                                                                                                                                                                                                                                                                                                                                                                                                                                                                                                                            |
| Complete List of Authors:       | Kim, Sarang; Australian National University, Centre for Research on Ageing, Health and Wellbeing<br>McMaster, Mitchell; Australian National University, Centre for Research on Ageing, Health and Wellbeing<br>Torres, Susan ; Deakin University<br>Cox, Kay L.<br>Lautenschlager, Nicola; University of Melbourne, Academic Unit of Psychiatry of Old Age<br>Rebok, George; Johns Hopkins Bloomberg School of Public Health, Psychiatry and Behavioral Sciences<br>Pond, Dimity; University of Newcastle Australia, General Practice<br>D'Este, Catherine; ANU College of Medicine, Biology and Environment The Australian National University, National Centre for Epidemiology and Population Health (NCEPH)<br>McRae, Ian; Australian National University, School of Population Health<br>Cherbuin, Nicolas; Australian National University, Centre for Research on Ageing, Health and Wellbeing<br>Anstey, Kaarin |
| <b>Primary Subject Heading</b>: | Public health                                                                                                                                                                                                                                                                                                                                                                                                                                                                                                                                                                                                                                                                                                                                                                                                                                                                                                          |
| Secondary Subject Heading:      | Medical education and training                                                                                                                                                                                                                                                                                                                                                                                                                                                                                                                                                                                                                                                                                                                                                                                                                                                                                         |
| Keywords:                       | RCT, Dementia < NEUROLOGY, Lifestyle change, online, Australia, General practice                                                                                                                                                                                                                                                                                                                                                                                                                                                                                                                                                                                                                                                                                                                                                                                                                                       |
|                                 |                                                                                                                                                                                                                                                                                                                                                                                                                                                                                                                                                                                                                                                                                                                                                                                                                                                                                                                        |

SCHOLARONE™  
Manuscripts

1  
2  
3  
4  
5 Protocol for a pragmatic randomised controlled trial of Body Brain Life – GP and a Lifestyle  
6 Modification Program to decrease dementia risk exposure in a primary care setting  
7  
8  
9  
10  
11  
12  
13  
14  
15  
16  
17  
18

19 Authors: Sarang Kim<sup>1\*</sup>, Mitchell McMaster<sup>1</sup>, Susan Torres<sup>2</sup>, Kay Cox<sup>3</sup>, Nicola  
20 Lautenschlager<sup>4</sup>, George Rebok<sup>5</sup>, Dimity Pond<sup>6</sup>, Catherine D’Este<sup>7</sup>, Ian McRae<sup>1</sup>, Nicolas  
21 Cherbuin<sup>1</sup>, Kaarin J Anstey<sup>1</sup>  
22  
23  
24  
25  
26  
27  
28

29 <sup>1</sup> Centre for Research on Ageing Health & Wellbeing, Australian National University,  
30 Canberra, Australia  
31  
32

33 <sup>2</sup> School of Exercise and Nutrition Sciences, Deakin University, Burwood, Australia  
34  
35

36 <sup>3</sup> University of Western Australia Medical School, Crawley, Australia  
37  
38

39 <sup>4</sup> Academic Unit for Psychiatry of Old Age, University of Melbourne, Melbourne, Australia  
40  
41

42 <sup>5</sup> Johns Hopkins Center on Aging and Health, Baltimore, USA  
43  
44

45 <sup>6</sup> School of Medicine and Public Health, University of Newcastle, Callaghan, Australia  
46  
47

48 <sup>7</sup> National Centre for Epidemiology & Population Health, Australian National University,  
49 Canberra, Australia  
50  
51  
52  
53  
54  
55  
56  
57  
58  
59  
60



1  
2  
3  
4  
5  
6 Corresponding author:  
7

8 Dr Sarang Kim  
9

10  
11 Centre for Research on Ageing Health & Wellbeing, Building 54, Mills Road, Australian  
12  
13 National University, Acton ACT 2601, Australia  
14  
15

16 E: [sarang.kim@anu.edu.au](mailto:sarang.kim@anu.edu.au)  
17

18  
19 T: +61 2 6125 0713  
20  
21  
22  
23

24 Word count: 4191  
25

26  
27 Issue date: 30 November 2017  
28  
29

30 Protocol Amendment Number: 01  
31  
32  
33  
34  
35  
36  
37  
38  
39  
40  
41  
42  
43  
44  
45  
46  
47  
48  
49  
50  
51  
52  
53  
54  
55  
56  
57  
58  
59  
60

## Abstract

**Introduction:** It has been estimated that a 10% to 25% reduction in seven key risk factors could potentially prevent 1.1 to 3.0 million Alzheimer's disease cases globally. In addition, as dementia is preceded by more subtle cognitive deficits which have substantial social and economic impact, effective preventative interventions would likely have more extensive benefits. The current study evaluates in primary care a multi-domain risk reduction intervention targeting adults with high risk of developing dementia.

**Methods and analysis:** A randomised controlled trial (RCT) is being conducted to evaluate three intervention programs using a pragmatic approach suitable to the clinic: 1) A 12-week online and face-to-face dementia risk reduction intervention (BBL-GP); 2) A 6-week face-to-face group lifestyle modification program (LMP); and 3) A 12-week email-only program providing general health information (active control). We aim to recruit 240 participants, aged 18 and over, to undergo a comprehensive cognitive and physical assessment at baseline and follow ups (post intervention, 18, 36 and 62 weeks). The primary outcome is dementia risk measured with the modified version of the ANU-ADRI-Short Form. Secondary outcomes are cognitive function measured with Trail A and B, and the Digit Symbol Modalities Test; physical activity with Moderate-Vigorous Physical Activity and the International Physical Activity Questionnaire; depression with the Centre for Epidemiological Studies Depression Scale; cost evaluation with the SF-12 health survey, Framingham coronary heart disease risk score, and Australian type 2 diabetes risk assessment tool; diet quality with the Australian Recommended Food Score; and sleep quality with the Pittsburgh Sleep Quality Index.

**Ethics and dissemination:** This RCT is a novel pragmatic intervention applied in a primary care setting to reduce the dementia risk exposure in adults at high risk. If successful, BBL-GP and LMP will provide a versatile, evidence-based package that can be easily and quickly

1  
2  
3 rolled-out to other primary care settings and which can be scaled up at relatively low cost  
4  
5 compared to other strategies involving intensive interventions.  
6  
7  
8  
9

10 Trial registration: Reg. no. ACTRN12616000868482  
11  
12  
13

14  
15  
16 Keywords: RCT, dementia, lifestyle change, online, physical activity, diet, cardiovascular  
17  
18 risk factors, Australia, general practice, primary care.  
19  
20  
21  
22  
23  
24  
25  
26  
27  
28  
29  
30  
31  
32  
33  
34  
35  
36  
37  
38  
39  
40  
41  
42  
43  
44  
45  
46  
47  
48  
49  
50  
51  
52  
53  
54  
55  
56  
57  
58  
59  
60

### Strengths and limitations of this study

- BBL-GP program has been built on our dementia prevention research programs which has been shown to reduce cognitive decline in older adults at-risk of dementia.
- This pragmatic trial evaluates a multi-domain risk reduction intervention targeting adults with high risk of developing dementia in primary care.
- A naturalistic approach is used in this trial to ensure the program can be adapted efficiently in primary care settings if proven effective.
- We are aware that most of our outcomes are self-reported and therefore can be subjective. Accordingly, we will interpret data conservatively.

## Introduction

No cure is available for Alzheimer's disease and other types of dementia. However, it is estimated that an achievable 10% to 25% reduction in seven key risk factors could prevent 1.1 to 3.0 million Alzheimer's disease (AD) cases internationally (1). It is also estimated that if each of seven risk factors was to be reduced by 5%, 10%, 15% and 20% per decade, dementia prevalence would be reduced by between 1.6 and 7.2% in 2020, 3.3-14.9% in 2030, 4-9 – 22.8% in 2040 and 6.6-30.7% in 2050 (2). Furthermore, as dementia is preceded by more subtle cognitive deficits which have substantial social and economic impacts, effective preventative interventions would likely have additional benefits.

Increasingly and to afford a greater chance of producing detectable changes during study timeframes, the dementia research community has focused on multi-domain interventions that address multiple risk factors simultaneously (3). Among individuals with high risk factor burden, cognitive decline can be reduced (and possibly reversed) as a result of cardiovascular risk reduction and increase in activities that stimulate and protect the brain including cognitive, social and physical activity and an appropriate diet (4). Alzheimer's disease and cardiovascular disease share cardiometabolic and lifestyle risk factors and cardiovascular risk reduction can be achieved by smoking cessation, increasing physical activities, adopting a healthy diet, reducing abnormally high blood pressure and cholesterol in mid-life, and managing major depression, overweight/obesity in mid-life and diabetes if present (5). Altogether, the literature supports the view that multi-domain interventions aimed at reducing cardiometabolic risk and promoting behaviours shown to protect against dementia will contribute to preventing cognitive decline, reduce overall risk of AD, and lower depressive symptoms.

Insufficient physical activity is the risk factor with the most evidence to support its role as a treatment for Mild Cognitive Impairment (MCI) (6) and more generally cognitive

1  
2  
3 decline (7). Physical activity has also been shown in RCTs to benefit several other risk  
4 factors for dementia including depression (8), and cardiovascular risk factors (9). Physical  
5 activity not only modifies multiple risk factors but it has direct benefits for brain health and  
6 cognition.  
7  
8  
9

10  
11 To bring about risk reduction, there needs to be long-lasting behavioural change in  
12 multiple areas. Achieving this requires using techniques such as goal setting, decreasing  
13 barriers to change, improving self-monitoring, having access to information, and maintaining  
14 motivation (10, 11). Therefore, this RCT investigates whether lifestyle management  
15 programs that offer not only health promoting information, but also practical behaviour  
16 change techniques which can be implemented in daily life can reduce dementia risk.  
17  
18  
19

#### 20 21 22 *Recruitment in general practice setting*

23  
24  
25  
26 Primary care is an ideal setting for the implementation of the current program because  
27 it is where adults with high risk of developing dementia are identified and early intervention  
28 and treatment are provided (12). Assessment of cardiovascular risk factors is common in  
29 primary care, as is advice about physical activity and diet. General practitioners (GP)  
30 commonly screen for diabetes and increasingly identify depression. GPs are often the first  
31 point of contact for patients who are worried that they may have dementia (13).  
32  
33  
34  
35  
36  
37  
38

39  
40 Although there has been one study conducted in primary care setting with elderly  
41 participants (70-78 years old) addressing cardiovascular risk factors (14), the current program  
42 is the first of its kind to provide interventions to adults (18 years and above) at the primary  
43 care setting, addressing both cardiovascular and lifestyle risk factors of dementia.  
44  
45  
46  
47

#### 48 49 **Methods and analysis**

##### 50 51 *Study setting and design*

52  
53 This project is a 6-12 week, pragmatic single-blind randomised controlled trial that is  
54 designed to assist participants develop and maintain a healthy lifestyle, as well as manage  
55  
56  
57

1  
2  
3 chronic diseases. The study evaluates the implementation of an evidence-based dementia risk  
4 reduction program that we developed and have evaluated previously on volunteers (15) and  
5 which has now been adapted for primary care (BBL-GP). The primary care setting in which  
6 the study is held already conducted a lifestyle management program (LMP) aimed at helping  
7 to manage chronic disease and maintaining a healthy lifestyle. The LMP program was  
8 initially developed to consist of 12 sessions over 12 weeks. However, its format was changed  
9 prior to this trial to have 12 sessions over 6 weeks. This decision was made by the clinic  
10 which provides this program in order for the program to be offered 4 times a year. The  
11 current LMP program was chosen as a comparison condition for feasibility and to enable  
12 evaluation of an existing program for dementia and cardiovascular risk reduction. The  
13 efficacy of the existing program had not previously been evaluated.

14  
15  
16  
17  
18  
19  
20  
21  
22  
23  
24  
25  
26  
27 The existing LMP program included 6 weeks of face-to-face group education sessions.  
28  
29 The BBL-GP program included 12 weeks of individually tailored online education sessions  
30 with one hour face-to-face individual sessions with a dietitian and an exercise physiologist.  
31  
32 The BBL-GP and LMP are being compared to an active control group receiving weekly email  
33 with links to health information. The study is being conducted in Canberra, Australian  
34  
35  
36  
37  
38  
39  
40  
41  
42  
43  
44  
45  
46  
47  
48  
49  
50  
51  
52  
53  
54  
55  
56  
57  
58  
59  
60  
The BBL-GP and LMP are being compared to an active control group receiving weekly email with links to health information. The study is being conducted in Canberra, Australian Capital Territory, Australia. The trial has been designed and is conducted according to the Consolidated Standards of Reporting Trials (CONSORT) statements for non-pharmaceutical (16) and pragmatic (17) trials and will be reported according to the Standard Protocol Items: Recommendations for Intervention Trials (SPIRIT) guidelines (18).

### *Participants*

Participants are being recruited from the National Health Co-op (NHC), the largest bulk billing general practice organisation in Canberra comprising of eight clinics. Bulk Billing is a payment option where the doctor bills directly the universal health insurance system (Medicare) in Australia for a medical service that the patients receive. Invitation emails have

1  
2  
3 been sent to all members excluding members who are inactive (those who did not renew their  
4 memberships), those aged less than 18 years, or without email addresses. Posters at the  
5 clinics are also being used for the recruitment. Potential participants who express their  
6 interest by contacting the LMP coordinator at the NHC or registering on the NHC's website  
7 are assessed against the inclusion and exclusion criteria. These are the types of adults who a  
8 GP would refer to a dementia risk reduction trial in 'real life' and on whom we are aiming to  
9 evaluate our intervention in a naturalistic context. In addition, risk factors for dementia exert  
10 their influence over decades and thus the earlier one decreases their risk exposure, the more  
11 impact it is likely to have over their lifespan. Therefore, this intervention program is open to  
12 anyone aged 18 and older. If criteria are met, information sheets and consent forms are sent to  
13 potential participants. Upon return of consent forms via email, each participant is officially  
14 registered to the study and allocated a unique identity numbers as well as an online account.

### 28 29 *Inclusion criteria*

30  
31  
32 A naturalistic approach is used in recruitment and the study inclusion criteria being used for  
33 this study are those already used by the NHC to refer patients to the LMP program (prior to  
34 this research project). The inclusion criteria is pragmatic as the practice already had criteria  
35 for referral to their LMP and in developing the protocol, it became clear that introducing a  
36 second set of inclusion criteria would make implementation difficult and reduce participant  
37 numbers. We therefore decided to use the principle that if a GP would refer the patient to the  
38 LMP then they would be eligible for the trial. This is a pragmatic feature of the current trial  
39 that significantly differs from our original BBL trial. We aimed to optimize the seamlessness  
40 of the intervention in primary care and utilize existing referral pathways to increase the  
41 probability that the intervention is conducted in a manner that could lead to implementation  
42 in real life. Participants must be aged 18 years and over, reside in the Australian Capital  
43 Territory, be current financial members of the NHC, have access to a computer and internet



1  
2  
3 connection at home, be fluent in English, Australian permanent residents or citizens (for bulk  
4 billing eligibility), and must be the only person in their household who is taking part in this  
5 study to prevent being randomly assigned to different groups and sharing information about  
6 their interventions with each other received. To be eligible for the study, participants are also  
7 required to have a chronic health condition (high blood pressure, heart disease, type 2  
8 diabetes or 'pre-diabetes', osteoporosis, osteoarthritis, polycystic ovary syndrome (PCOS),  
9 kidney or liver disease, and depression/anxiety) or be overweight or obese (BMI>25). They  
10 are also required to agree to commit 1-2 hours a week to complete the program and be  
11 interested in obtaining advice on improving their lifestyle to reduce the risk of or better  
12 manage chronic disease. Participants are required to complete online assessments and attend  
13 NHC at baseline and 18, 36, and 62 weeks after commencement of the intervention for  
14 medical and cognitive assessments.  
15  
16  
17  
18  
19  
20  
21  
22  
23  
24  
25  
26  
27

### 28 29 *Exclusion criteria*

30  
31  
32 Participants are not eligible to enrol in the trial if they have significant and unstable medical  
33 and psychiatric conditions that would prevent participation in the trial. They are also  
34 ineligible if they have sensory deficits or mobility limitations that would prevent or  
35 substantially restrict the delivery of the assessment or intervention, have cognitive  
36 impairment, or are pregnant.  
37  
38  
39  
40  
41  
42

### 43 *Sample size calculations*

44  
45  
46 Sample size calculations were estimated using G\*Power (version 3.1.9.2;  
47 <http://www.gpower.hhu.de/en.html>) and have been based on medium effect size as  
48 observed in the previous Body Brain Life project with same primary outcome (19). To  
49 detect a medium effect (0.5 standard deviation (SD)) in a 3-group design (1:1:1), 4  
50 measurements with a 5% risk of type 1 error ( $\alpha$ ) and 80% power, a total sample size of  
51  
52  
53  
54  
55  
56  
57  
58  
59  
60

1  
2  
3 159 persons is required. To account for a 33% attrition (based on previous lifestyle  
4 modification program by NHC using the same inclusion and exclusion criteria and  
5 targeting same age group), a baseline sample of 240 is being recruited (80 in BBL-GP  
6 group, 80 in LMP group and 80 in control group).  
7  
8  
9

### 10 11 12 *Assessments*

13  
14 Participants who meet all inclusion and no exclusion criteria are invited to complete online  
15 surveys and visit NHC for the baseline evaluation, and for week 18, 36, and 62 follow ups.  
16  
17 Immediate follow up is also conducted online at week 7 for LMP, and week 13 for BBL-GP  
18 and control groups. Table 1 summarizes the assessment measures and schedule.  
19  
20  
21  
22

### 23 24 *Screening measures and covariate*

25  
26 In addition to the above inclusion and exclusion criteria, further screening measures are  
27 conducted to ensure that participants are capable of taking part in the study. The Adult Pre-  
28 exercise Screening System (APSS) (20) is used at the baseline assessment to identify  
29 individuals with acute/high risk conditions, or who may be at higher risk of an adverse event  
30 during exercise. To screen for any cognitive impairment (<25), the Mini-Mental State  
31 Examination (MMSE) (21) is administered to participants aged 60 and older.  
32  
33  
34  
35  
36  
37  
38  
39

40 Health efficacy and motivation for healthiness subscales from the Multidimensional  
41 Health Questionnaire (MHQ) (22) is used to measure the extent to which people believe they  
42 have the ability, capability, skills and talents to take care of their own physical health, and to  
43 measure people's motivation to keep in good physical health.  
44  
45  
46  
47  
48

### 49 50 *Primary outcome*

51  
52 The primary outcome is one's exposure profile to demonstrated risk factors for Alzheimer's  
53 disease. It is measured with a modified version of the Australian National University  
54  
55  
56  
57

1  
2  
3 Alzheimer's Disease Risk Index – Short form (ANU-ADRI – SF) (23). The ANU-ADRI-SF  
4 is comprised of validated scales assessing 15 individual risk and protective factors for  
5  
6 Alzheimer's disease and dementia. Intra class correlation coefficients suggested that the  
7  
8 reliability of the ANU-ADRI-SF compared to the original ANU-ADRI were moderate to  
9  
10 strong (0.77 to 0.99) and statistically significant ( $p < .001$ ) except for cognitive activity.  
11  
12 Therefore, for the assessment of engagement in cognitive activities levels only, items from  
13  
14 the original ANU-ADRI (19, 24) are used in place of those from the ANU-ADRI-SF due to  
15  
16 limitations of the latter.  
17  
18

### 19 20 21 *Secondary outcomes*

22  
23 Secondary outcomes include cognitive function, physical activity level, depressive symptoms,  
24  
25 cost of interventions, diet and sleep quality. They are measured as follows: cognitive function  
26  
27 is assessed with processing speed, task switching and executive function using Trails A and B,  
28  
29 and the Digit Symbol Modalities Test (DSMT). These tests were chosen because the  
30  
31 executive function is the most sensitive cognitive domain to physical activity interventions  
32  
33 (25) and a decline in processing speed is associated with cardiovascular risk factors (26).  
34  
35 Both Trails and DSMT have been used widely and have been reported to have good  
36  
37 reliability and validity (27-30). Moderate-vigorous Physical Activity (MVPA) is a continuous  
38  
39 measure of activity that registers three or more Metabolic Equivalents (METs) for 10 minutes  
40  
41 or longer on an ActiGraph Link activity monitor  
42  
43 (<http://actigraphcorp.com/products/actigraph-link/>), which is worn for 7 days. Self-reported  
44  
45 physical activity is also being recorded using the short form of IPAQ (31), which is part of  
46  
47 the ANU-ADRI-SF. Reliability and validity of IPAQ has been tested and confirmed across 12  
48  
49 countries (31). Depression is being assessed with the Centre for Epidemiological Studies  
50  
51 Depression (CES-D) Scale (32), which is also part of the ANU-ADRI. CES-D scale has a  
52  
53 very high internal consistency and validity (33).  
54  
55  
56  
57  
58  
59  
60

1  
2  
3 Health outcomes are assessed with the SF-12 health survey (34), Framingham  
4 coronary heart disease (CHD) risk score (35), and Australian type 2 diabetes risk assessment  
5 tool (AUSDRISK) (36) to enable cost effectiveness evaluation of the two health promotion  
6 interventions. SF-12 measures both physical and mental health status and has acceptable  
7 validity and reliability (37, 38). Framingham CHD is a validated tool to assess cardiovascular  
8 diseases (39) and AUSDRISK is a diabetes risk assessment tool based on demographic,  
9 lifestyle and simple anthropometric measures (36).  
10  
11  
12  
13  
14  
15  
16  
17

18 Dietary quality is assessed with a food-based diet quality index, the Australian  
19 Recommended Food Score (ARFS) (40). The ARFS is aligned with Australian Dietary  
20 Guidelines (41) and the Australian Guide to Healthy Eating (42) recommendations. The  
21 ARFS total ranges from 0 to 73 and includes eight subscales: vegetables (0 to 21), fruit (0 to  
22 12), protein (0 to 7), vegetarian alternatives (0 to 6), grains (0 to 13), dairy (0 to 11), water (0  
23 to 1), sauces and condiments (0 to 2). Higher scores indicate greater compliance with the  
24 Australian Dietary Guidelines and therefore better diet quality. The ARFS has demonstrated  
25 good validity and reproducibility (40).  
26  
27  
28  
29  
30  
31  
32  
33  
34  
35

36 Lastly, the Pittsburgh Sleep Quality Index (PSQI) (43) is an effective instrument used  
37 to measure the quality and patterns of sleep in adults. It differentiates “poor” from “good”  
38 sleep quality by measuring seven areas (components): subjective sleep quality, sleep latency,  
39 sleep duration, habitual sleep efficiency, sleep disturbances, use of sleeping medications, and  
40 daytime dysfunction over the last month. PSQI reports great test-retest reliability (0.87) and  
41 high correlations with sleep log data (44).  
42  
43  
44  
45  
46  
47  
48  
49

### 50 *Randomization*

51  
52  
53 Upon completion of the baseline assessment, participants are randomly allocated into one of  
54 the three groups (see Table 2 and Figure 1). The allocation sequence is computer generated  
55  
56  
57  
58  
59  
60

1  
2  
3 by an independent researcher and is not known to the study team at the time of enrolment and  
4  
5 baseline assessment. A permuted block randomization sequence comprising block sizes of 6  
6  
7 stratified by gender and age group (18-49 vs 50+) is used. The project manager who is not  
8  
9 involved with conducting assessments assigns the participants into groups according to the  
10  
11 generated sequence and notifies participants of their group allocation via email.  
12

### 13 14 *Interventions*

#### 15 16 17 *Group 1: Body Brain Life – General Practice (BBL-GP)*

18  
19 BBL-GP is an intervention package that builds on our dementia prevention research programs.  
20  
21 This includes an online dementia risk reduction program called the Body Brain Life (BBL;  
22  
23 Trial ID: ACTRN12612000147886) (15, 45) and the Fitness for the Ageing Brain Study  
24  
25 (FABS; Trial ID: ACTRN 12609000755235) (46, 47). Contents for the BBL-GP online  
26  
27 modules have been revised after extensive consumer evaluation by members of the  
28  
29 Alzheimer’s Australia Consumer Dementia Research Network as well as members of the  
30  
31 public and from participant feedback after the previous trial. The physical activity program  
32  
33 has also been modified for a younger age-group to 18 years and older as previous programs  
34  
35 targeted middle aged and older adults. The Actigraph device was introduced to measure the  
36  
37 objective amount and intensity of physical activity. This revised program (Body Brain Life –  
38  
39 Fit) was piloted with the general public (Trial ID: ACTRN12615000822583).  
40  
41  
42

43  
44 Participants in the BBL-GP group are required to complete 8 modules (dementia  
45  
46 literacy, risk factors, physical activity, nutrition, health, cognitive activity, social activity and  
47  
48 mood) delivered online. Prior to commencing online modules, participants in the BBL-GP  
49  
50 group also receive an individually tailored plan/program for both dietary and physical activity  
51  
52 interventions developed and delivered by a dietitian and an exercise physiologist, respectively  
53  
54 during a face-to-face assessment. This is to ensure the dietary prescription and level of  
55  
56  
57  
58  
59  
60

1  
2  
3 physical activity are suitable and tailored to individual participants.  
4

#### 5 *Physical activity session*

6  
7 The session duration and frequency of the physical activity (PA) program varies between  
8 participants based on baseline physical activity levels and individual tailoring. An exercise  
9 physiologist designs an individual program for the participant, delivers this in a face-to-face  
10 workshop and monitors the physical activity program via the returned diaries and telephone  
11 monitoring. For those not doing any regular PA at baseline, the target is 150 minutes/week  
12 moderate intensity PA, with moderate intensity defined as a score of 10-12 on the Borg  
13 Rating of Perceived Exertion scale (RPE) (48). For those who are doing regular PA but for  
14 less than 100 minutes/week, an additional 100 minutes/week is prescribed, and for those  
15 meeting the target, an additional 50 minutes/week is prescribed. Printed material guiding  
16 participants to increase their activity level with worksheets are also provided. A diary in the  
17 format of a calendar returned monthly for 24 weeks is used to record PA and RPE to assess  
18 PA and intensity adherence. Participants may develop a medical problem or undergo  
19 treatment that can make exercising difficult or impossible. If this happens, prescribed amount  
20 of exercise is reviewed and re-prescribed, or stopped.  
21  
22  
23  
24  
25  
26  
27  
28  
29  
30  
31  
32  
33  
34  
35  
36

#### 37 *Dietary session*

38  
39 Participants at baseline who had unintentional weight loss of 5 kg or weight gain of 5 kg over  
40 the previous six months were seen by the dietitian. Furthermore, participants whose diets at  
41 baseline scored low on one or more of the subscales of the (ARFS) (vegetables <14, fruit <8,  
42 protein <4, grains <9, dairy <8, water <1) (40), were also seen by the dietitian. Dietary  
43 counselling was provided by a trained dietitian and overseen by the coordinating dietitian.  
44  
45 During the one hour face-to-face counselling session, participants received individually  
46 tailored dietary advice and printed material explaining the diet in detail.  
47  
48  
49  
50  
51  
52  
53

#### 54 *Follow ups*

1  
2  
3 Participants in the BBL-GP group are monitored through phone calls at week 4, 12 (14 for  
4 PA) and week 20 by the dietitian and exercise physiologist to monitor the progress and for  
5 reassurance. In addition, they receive a general booster session at 12 months with a phone  
6 call and a mailed-out booklet summarising materials from the online modules. They are being  
7 asked to continue being active and follow a healthy eating plan after completion of the  
8 intervention.  
9  
10  
11  
12  
13  
14

### 15 *Online modules*

16  
17  
18 Once participants in the BBL-GP group have received face-to-face PA and dietary  
19 counselling sessions, they are asked to log on to the trial website and complete one module  
20 per week, each taking approximately 30-40 minutes. The 12-week program is detailed in  
21 Table 3. The first 8 weeks include the completion of 8 educational and individually tailored  
22 behaviour change modules. In the remaining 4 weeks, participants undertake online activities  
23 focused on goal monitoring and revision of the modules materials. Tailoring of the six  
24 behaviour change modules (weeks 3-8) is conducted using an automated algorithm that  
25 presents content on the basis of whether or not the participant has a relevant risk factor, as  
26 well as on the basis of their responses to several questions measuring psychological  
27 determinants of behaviour. These questions are presented at the beginning of each of the  
28 behaviour change modules. For instance, a person who is classified as having a poor diet (e.g.  
29 lack of fish intake) on the basis of their responses on the ANU-ADRI, and who does not  
30 regard himself/herself as a role model to others with respect to their diet habits will not be  
31 presented with information focusing on becoming a role model to others.  
32  
33  
34  
35  
36  
37  
38  
39  
40  
41  
42  
43  
44  
45  
46  
47

48 The program is built in such a way that participants are only able to access the  
49 relevant component of the intervention at a given time. The modules become active, 1 per  
50 week, on the same day for the first 8 weeks. Participants are unable to access a newly  
51 activated module before completing the previously scheduled module. Each week,  
52  
53  
54  
55  
56  
57  
58  
59  
60

1  
2  
3 participants receive a notification email on the same day of the week alerting them when a  
4  
5 new module has become active and a list of already activated modules that they have either  
6  
7 not started or completed. Participants who are late completing modules will be followed up  
8  
9 with an email from the project manager to identify if there is a reason (e.g. holidays, illness,  
10  
11 work commitments) preventing their participation, and encouraging them to continue with the  
12  
13 study. Compliance is recorded for each module if they are completed on time, delayed or not  
14  
15 completed.

### 16 17 18 *Group 2: Lifestyle Modification Program (LMP)*

19  
20  
21 The lifestyle modification program (LMP), developed by NHC, is designed to provide  
22  
23 individuals with tools to help manage chronic disease and maintain a healthy lifestyle. LMP  
24  
25 is a six- week group program provided by various health professionals (dietitian, exercise  
26  
27 physiologist, nurse practitioner, psychologist, pharmacist and sleep physician) providing  
28  
29 information on basic nutrition, meal planning, physical activity, health conditions, motivation  
30  
31 and goals, medications, and sleep. Every week, 2 sessions are provided on the same day with  
32  
33 each session lasting an hour. The course is currently run by the NHC for their patients to  
34  
35 assist them in improving their lifestyle and management of chronic disease so it is a  
36  
37 pragmatic real-life comparison condition. Attendance is recorded for compliance and  
38  
39 motivation checking. Although the LMP is a free nationally recognized program that is  
40  
41 designed to provide individuals with tools to help manage chronic disease and maintain a  
42  
43 healthy lifestyle, evaluation of the program has not been carried out as yet. The attendance is  
44  
45 recorded each week for a fidelity test.

### 46 47 48 *Group 3: Active control/Email only*

49  
50  
51 The active control group or email only group proceed with their normal activities and access  
52  
53 health services as required over the trial period. Participants in this group also receive weekly  
54  
55



1  
2  
3 emails containing links to various websites providing information on lifestyle risk factors and  
4 disease management for a duration of 12 weeks. The weekly emails contain several links, and  
5  
6  
7 participants are encouraged to spend approximately an hour each week browsing through the  
8  
9 material. The material is generally organized around the same themes as the ones included in  
10  
11 the BBL-GP program. An effort has been made to include links to relevant information and  
12  
13 educational material, but that otherwise does not include the use of identifiable behaviour-  
14  
15 change techniques which are the 'active ingredient' of the BBL-GP program. In addition,  
16  
17 other than providing participants with the weekly emails, no further contact is made with the  
18  
19 participants in this group, such as reminders and prompts that are provided to the BBL-GP  
20  
21 group.  
22  
23

#### 24 *Masking*

25  
26 To prevent performance bias, research staff conducting the assessments remain masked to  
27  
28 participants' group allocation. The contact person for participants' website queries, access  
29  
30 issues, and technical difficulties is independent of all baseline assessment data. All  
31  
32 participants are informed that they are being randomly allocated to one of three study groups  
33  
34 and that one group may be more effective than others. They are also notified at the start of the  
35  
36 study that one of these groups involves face-to-face group sessions which require them to  
37  
38 travel to NHC head office. Hence, the research team members who recruit participants,  
39  
40 conduct individual diet and physical activity sessions, and professionals who are involved in  
41  
42 the LMP are naturally able to tell which group they have been allocated to. Nurses who  
43  
44 conduct baseline and follow-up assessments are however masked to group allocation.  
45  
46  
47

#### 48 *Data management and monitoring*

49  
50 A trial management committee is formed by the research team members (chief and co-  
51  
52 investigators). Nursing staffs from NHC and research assistants collect, clean and send the  
53  
54 study data to the committee on a weekly basis. Most data are automatically entered into excel  
55  
56  
57  
58  
59  
60

1  
2  
3 files and other data are double-entered to SPSS files to prevent data entry errors. Data  
4  
5 management is then handled independently from the researchers who interpret the data. All  
6  
7 data are stored electronically and in an independent spreadsheet and SPSS data file, which is  
8  
9 only accessible by the researchers involved in this study.  
10

11 An independent Data Monitoring Committee (DMC) is established independently  
12  
13 from the research team who are involved with collecting and managing data. The DMC will  
14  
15 provide an independent oversight of the trial and will review general conduct of the trial and  
16  
17 study data for participant safety. The DMC is comprised of independent, multidisciplinary  
18  
19 experts in dementia research who will make recommendations regarding the continuation,  
20  
21 modification or termination of the trial.  
22  
23

24 Adverse events (minor and serious) will be monitored throughout the trial by the  
25  
26 research team and any adverse events will be reported to the trial Data Monitoring  
27  
28 Committee. For this trial, an adverse event is defined as an unwanted and usually  
29  
30 harmful outcome (e.g. physical injuries). The event may or may not be related to the  
31  
32 intervention, but it occurs while the person is participating in the intervention, that is,  
33  
34 while they are undertaking physical activities individually prescribed by the exercise  
35  
36 physiologist.  
37  
38

39 There are no formal interim analyses planned, as it is not expected that adverse events  
40  
41 will be differentially related to the interventions.  
42  
43

#### 44 *Statistical analyses*

45  
46 Statistical analyses will be based on an intention-to-treat approach. As applied in the previous  
47  
48 BBL project (15), multiple imputation and mixed models will be applied to analyse data. We  
49  
50 hypothesise that the effectiveness of the intervention programs will be in the following order:  
51  
52 BBL-GP > LMP > active control. The hypothesis that BBL-GP will be more effective than  
53  
54 LMP is based on research showing that a tailored program is better than a one size fits all  
55  
56  
57  
58  
59  
60

1  
2  
3 group program in most cases (49). This is also based on the previous BBL project where  
4  
5 those in BBL groups improved more than those in the control group. We will also adjust for  
6  
7 compliance in completing the online modules and following recommendations provided by  
8  
9 the dietitian and exercise physiologist (for BBL-GP group), or for attendance to weekly group  
10  
11 sessions (for LMP group).  
12

### 13 *Ethics and trial registration*

14  
15 The Human Research Ethics Committee at the Australian National University has approved  
16  
17 the study protocols and procedures (protocol #2016/157). This project has also been  
18  
19 registered at the Australian New Zealand Clinical Trials Registry (ACTRN:  
20  
21 12616000868482).  
22  
23

### 24 *Adverse events*

25  
26 This study evaluates lifestyle intervention programs to reduce risk factors for AD. The target  
27  
28 population is adults in a primary care setting who have some of the known risk factors for  
29  
30 dementia, but are at the time of the intervention, healthy and free of any dementia-related  
31  
32 symptoms. We do not anticipate that participants will be placed at a greater risk than that  
33  
34 associated with self-driven educational activities over the Internet. An adverse event where a  
35  
36 participant can get hurt during prescribed exercise can occur. To prevent this, we screen  
37  
38 participants using APSS at the baseline assessment to identify individuals with acute/high  
39  
40 risk conditions for exercise. In addition, the exercise physiologist individually tailors  
41  
42 prescribed exercise to minimise risk of injury. Medical assessments are done by the  
43  
44 participants' usual nurses and doctors and if any abnormality is detected in their results, they  
45  
46 are required to discuss these abnormalities with participants as usual. To address issues of  
47  
48 potential fatigue, the assessments have been kept to a minimum length. In addition, all online  
49  
50 and face-to-face sessions are designed in an interactive way and are limited to 1-hour sessions  
51  
52 (LMP has 2 themed sessions per week and has a break between sessions). As mentioned  
53  
54  
55  
56  
57  
58  
59  
60

1  
2  
3 above, all online modules are delivered in an individually tailored fashion to maximize  
4  
5 relevance for each individual.

#### 6 7 *Dissemination plan*

8  
9 Positive, neutral and negative results of the trial will be submitted to international peer-  
10  
11 reviewed journals. In addition, results will be presented at national and international  
12  
13 conferences relevant to the subject matters. Authorship will be allocated using the guidelines  
14  
15 for authorship defined by the International Committees of Medical Journal Editors and  
16  
17 depends on personal involvement.  
18

#### 19 20 **Discussion**

21  
22 The project is currently under way as an evaluation of the efficacy of health promotion  
23  
24 interventions in adults with risk factors for dementia. The program aims to reduce  
25  
26 cardiometabolic risk and promote behaviours shown to protect against dementia. The trial,  
27  
28 recruiting from a primary care setting has generated considerable interest, and to date,  
29  
30 approximately half of the total target sample has been assessed and randomised into the  
31  
32 intervention groups. We anticipate that all data collection will be completed by December  
33  
34 2018. The results of the study are likely to form an evidence base for the feasibility of  
35  
36 dementia risk reduction campaigns to lead to lifestyle changes and the reduction of dementia  
37  
38 risk factors at the population level. This trial will also support the feasibility of such  
39  
40 interventions being applied in primary care settings. Successful outcomes of the current trial  
41  
42 may lead to significant public health impact and benefits once the intervention is made  
43  
44 available at the population level pending positive results.  
45  
46  
47

#### 48 49 **Conclusion**

50  
51 Interventions to reduce risk of developing dementia are needed as a cure is not available. This  
52  
53 project compares three different approaches to promote healthy lifestyles and to reduce risk  
54  
55 of developing dementia applied in a primary care setting. This unique trial demonstrates real  
56  
57  
58  
59  
60

1  
2  
3 life application of dementia risk reduction intervention rather than more controlled but less  
4  
5 ecologically valid interventions typically tested in a research setting.  
6  
7  
8  
9  
10  
11  
12  
13  
14  
15  
16  
17  
18  
19  
20  
21  
22  
23  
24  
25  
26  
27  
28  
29  
30  
31  
32  
33  
34  
35  
36  
37  
38  
39  
40  
41  
42  
43  
44  
45  
46  
47  
48  
49  
50  
51  
52  
53  
54  
55  
56  
57  
58  
59  
60

For peer review only

## References

1. Barnes D, Yaffe K. The projected effect of risk factor reduction on Alzheimer's disease prevalence. *The Lancet Neurology*. 2011;10(9):819-28.
2. Ashby-Mitchell K, Burns R, Shaw J, Anstey KJ. Proportion of dementia in Australia explained by common modifiable risk factors. *Alzheimers Res Ther*. 2017;9(1):11.
3. Ngandu T, Lehtisalo J, Solomon A, Levälähti E, Ahtiluoto S, Antikainen R, et al. A 2 year multidomain intervention of diet, exercise, cognitive training, and vascular risk monitoring versus control to prevent cognitive decline in at-risk elderly people (FINGER): a randomised controlled trial. *The Lancet*. 2015;385(9984):2255-63.
4. Prince M, Albanese E, Guerchet M, Prina M. *World Alzheimer Report 2014: Dementia and Risk Reduction. An analysis of protective and modifiable factors*. London: ADI; 2014.
5. Santos CY, Snyder PJ, Wu W-C, Zhang M, Echeverria A, Alber J. Pathophysiologic relationship between Alzheimer's disease, cerebrovascular disease, and cardiovascular risk: A review and synthesis. *Alzheimer's & dementia: Diagnosis, Assessment & Disease Monitoring*. 2017;7:69-87.
6. Blondell SJ, Hammersley-Mather R, Veerman JL. Does physical activity prevent cognitive decline and dementia?: A systematic review and meta-analysis of longitudinal studies. *BMC Public Health*. 2014;14:510.
7. Northey JM, Cherbuin N, Pumpa KL, Smee DJ, Rattray B. Exercise interventions for cognitive function in adults older than 50: a systematic review with meta-analysis. *British Journal of Sports and Medicine*. 2017.
8. Mammen G, Faulkner G. Physical activity and the prevention of depression: a systematic review of prospective studies. *Am J Prev Med*. 2013;45(5):649-57.

- 1  
2  
3 9. Brouwer BG, van der Graaf Y, Soedamah-Muthu SS, Wassink AM, Visseren FL.  
4  
5 Leisure-time physical activity and risk of type 2 diabetes in patients with established vascular  
6  
7 disease or poorly controlled vascular risk factors. *Diabetes research and clinical practice*.  
8  
9 2010;87(3):372-8.  
10
- 11 10. Middleton KR, Anton SD, Perri MG. Long-term Adherence to Health Behavior  
12  
13 Change. *American Journal of Lifestyle Medicine*. 2013;7(6):395-404.  
14
- 15 11. Locke EA. Motivation through conscious goal setting. *Applied and Preventive*  
16  
17 *Psychology*. 1996;5(2):117-24.  
18
- 19 12. The Department of Health. National primary health care strategic framework: Primary  
20  
21 health care in Australia 2013 [Available from:  
22  
23 [http://www.health.gov.au/internet/publications/publishing.nsf/Content/NPHC-Strategic-](http://www.health.gov.au/internet/publications/publishing.nsf/Content/NPHC-Strategic-Framework~phc-australia)  
24  
25 [Framework~phc-australia](http://www.health.gov.au/internet/publications/publishing.nsf/Content/NPHC-Strategic-Framework~phc-australia).  
26  
27
- 28 13. Robinson L, Tang E, Taylor J-P. Dementia: timely diagnosis and early intervention.  
29  
30 *BMJ : British Medical Journal*. 2015;350.  
31  
32
- 33 14. van Charante EPM, Richard E, Eurelings LS, van Dalen J-W, Ligthart SA, van Bussel  
34  
35 EF, et al. Effectiveness of a 6-year multidomain vascular care intervention to prevent  
36  
37 dementia (preDIVA): a cluster-randomised controlled trial. *The Lancet*.  
38  
39 2016;388(10046):797-805.  
40
- 41 15. Anstey KJ, Bahar-Fuchs A, Herath P, Kim S, Burns R, Rebok GW, et al. Body brain  
42  
43 life: A randomized controlled trial of an online dementia risk reduction intervention in  
44  
45 middle-aged adults at risk of Alzheimer's disease. *Alzheimer's & Dementia: Translational*  
46  
47 *Research & Clinical Interventions*. 2015;1(1):72-80.  
48  
49
- 50 16. Boutron I, Moher D, Altman DG, Schulz KF, Ravaud P, for the CG. Extending the  
51  
52 consort statement to randomized trials of nonpharmacologic treatment: Explanation and  
53  
54 elaboration. *Ann Intern Med*. 2008;148(4):295-309.  
55  
56  
57  
58  
59  
60

- 1  
2  
3 17. Zwarenstein M, Treweek S, Gagnier JJ, Altman DG, Tunis S, Haynes B, et al.  
4  
5 Improving the reporting of pragmatic trials: an extension of the CONSORT statement. *BMJ*.  
6  
7 2008;337.
- 8  
9 18. Chan A, Tetzlaff JM, Altman DG, et al. Spirit 2013 statement: Defining standard  
10  
11 protocol items for clinical trials. *Ann Intern Med*. 2013;158(3):200-7.
- 12  
13 19. Anstey KJ, Cherbuin N, Herath P. Development of a new method for assessing global  
14  
15 risk of Alzheimer's disease for use in population health approaches to prevention. *Prev Sci*.  
16  
17 2013;14:411-21.
- 18  
19 20. Exercise & Sports Science Australia. Adult pre-exercise screening system 2011  
20  
21 [Available from: <https://www.essa.org.au/for-gps/adult-pre-exercise-screening-system/>.  
22  
23
- 24 21. Folstein MF, Folstein SE, McHugh PR. "Mini-mental state". A practical method for  
25  
26 grading the cognitive state of patients for the clinician. *J Psychiatr Res*. 1975;12(3):189-98.
- 27  
28 22. Snell WE, Jr., Johnson G. The Multidimensional Health Questionnaire. *American*  
29  
30 *Journal of Health Behavior*. 1997;21:33-42.
- 31  
32 23. Kim S, Cherbuin N, Anstey KJ. Assessing reliability of short and tick box forms of  
33  
34 the ANU-ADRI: Convenient alternatives of a self-report Alzheimer's disease risk assessment.  
35  
36 *Alzheimer's & Dementia: Translational Research & Clinical Interventions*. 2016;2(2):93-8.
- 37  
38 24. Anstey KJ, Cherbuin N, Herath P, Qiu C, Kuller LH, Lopez OL, et al. A self-report  
39  
40 risk index to predict occurrence of dementia in three independent cohorts of older adults: the  
41  
42 ANU-ADRI. *PLoS ONE*. 2014;9(1):e86141.
- 43  
44 25. Colcombe S, Kramer AF. Fitness effects on the cognitive function of older adults: a  
45  
46 meta-analytic study. *Psychol Sci*. 2003;14(2):125-30.
- 47  
48 26. Anstey KJ, Sargent-Cox K, Garde E, Cherbuin N, Butterworth P. Cognitive  
49  
50 development over 8 years in midlife and its association with cardiovascular risk factors.  
51  
52 *Neuropsychology*. 2014;28(4):653-65.
- 53  
54  
55  
56  
57  
58  
59  
60



- 1  
2  
3 27. Spreen O, Strauss E. A compendium of neuropsychological tests: administration,  
4 norms and commentary. New York: Oxford University Press; 1991.  
5  
6  
7 28. Arbuthnott K, Frank J. Trail Making Test, Part B as a Measure of Executive Control:  
8 Validation Using a Set-Switching Paradigm. *J Clin Exp Neuropsychol*. 2000;22(4):518-28.  
9  
10  
11 29. Giovagnoli AR, Del Pesce M, Mascheroni S, Simoncelli M, Laiacona M, Capitani E.  
12 Trail making test: normative values from 287 normal adult controls. *The Italian Journal of*  
13 *Neurological Sciences*. 1996;17(4):305-9.  
14  
15  
16 30. Smith A. Symbol digit modalities test: Manual. . Los Angeles: Western Psychological  
17 Services; 1982.  
18  
19  
20 31. Craig CL, Marshall AL, Sjoström M, Bauman AE, Booth ML, Ainsworth BE, et al.  
21 International physical activity questionnaire: 12-country reliability and validity. *Med Sci*  
22 *Sports Exerc*. 2003;35(8):1381-95.  
23  
24  
25 32. Radloff L. The CES-D scale: A self report depression scale for research in the general  
26 population. *Applied Psychological Measurement*. 1977;1:385-401.  
27  
28  
29 33. Radloff LS. The CES-D Scale:A Self-Report Depression Scale for Research in the  
30 General Population. *Applied Psychological Measurement*. 1977;1(3):385-401.  
31  
32  
33 34. Ware J, Jr., Kosinski M, Keller SD. A 12-Item Short-Form Health Survey:  
34 construction of scales and preliminary tests of reliability and validity. *Medical care*.  
35 1996;34(3):220-33.  
36  
37  
38 35. Wilson PWF, D'Agostino RB, Levy D, Belanger AM, Silbershatz H, Kannel WB.  
39 Prediction of Coronary Heart Disease Using Risk Factor Categories. *Circulation*.  
40 1998;97(18):1837-47.  
41  
42  
43 36. Chen L, Magliano DJ, Balkau B, Colagiuri S, Zimmet PZ, Tonkin AM, et al.  
44 AUSDRISK: an Australian Type 2 Diabetes Risk Assessment Tool based on demographic,  
45  
46  
47  
48  
49  
50  
51  
52  
53  
54  
55  
56  
57  
58  
59  
60

- lifestyle and simple anthropometric measures. *The Medical journal of Australia*. 2010;192:197-202.
37. Jakobsson U. Using the 12-item Short Form health survey (SF-12) to measure quality of life among older people. *Aging clinical and experimental research*. 2007;19(6):457-64.
38. Maruish ME. *User's Manual for the SF-12v2 Health Survey (3rd ed.)*. Lincoln, RI: Quality Metric Incorporated; 2012.
39. Framingham Heart Study. <https://www.framinghamheartstudy.org/risk-functions/coronary-heart-disease/10-year-risk.php> 2017 [Available from: <https://www.framinghamheartstudy.org/risk-functions/coronary-heart-disease/10-year-risk.php>].
40. Collins CE, Burrows TL, Rollo ME, Boggess MM, Watson JF, Guest M, et al. The comparative validity and reproducibility of a diet quality index for adults: the Australian Recommended Food Score. *Nutrients*. 2015;7(2):785-98.
41. National Health and Medical Research Council. *Australian Dietary Guidelines*. Canberra: National Health and Medical Research Council; 2013.
42. National Health and Medical Research Council. *Australian Guide to Healthy Eating*. Canberra: National Health and Medical Research Council; 2003.
43. Buysse DJ, Reynolds CF, 3rd, Monk TH, Berman SR, Kupfer DJ. The Pittsburgh Sleep Quality Index: a new instrument for psychiatric practice and research. *Psychiatry research*. 1989;28(2):193-213.
44. Backhaus J, Junghanns K, Broocks A, Riemann D, Hohagen F. Test-retest reliability and validity of the Pittsburgh Sleep Quality Index in primary insomnia. *J Psychosom Res*. 2002;53(3):737-40.

- 1  
2  
3 45. Anstey KJ, Bahar-Fuchs A, Herath P, Rebok GW, Cherbuin N. A 12-week  
4 multidomain intervention versus active control to reduce risk of Alzheimer's disease: study  
5 protocol for a randomized controlled trial. *Trials*. 2013;14:60.  
6  
7  
8  
9 46. Lautenschlager NT, Cox KL, Flicker L, Foster JK, van Bockxmeer FM, Xiao J, et al.  
10 Effect of physical activity on cognitive function in older adults at risk for Alzheimer disease:  
11 a randomized trial. *JAMA*. 2008;300:1027-37.  
12  
13  
14  
15 47. Cyarto EV, Cox KL, Almeida OP, Flicker L, Ames D, Byrne G, et al. The fitness for  
16 the Ageing Brain Study II (FABS II): protocol for a randomized controlled clinical trial  
17 evaluating the effect of physical activity on cognitive function in patients with Alzheimer's  
18 disease. *Trials*. 2010;11:120.  
19  
20  
21  
22  
23  
24 48. Borg GA. Psychophysical bases of perceived exertion. *Med Sci Sports Exerc*.  
25 1982;14(5):377-81.  
26  
27  
28 49. Kreuter MW, Oswald DL, Bull FC, Clark EM. Are tailored health education materials  
29 always more effective than non-tailored materials? *Health Education Research*.  
30 2000;15(3):305-15.  
31  
32  
33  
34  
35  
36  
37  
38  
39  
40  
41  
42  
43  
44  
45  
46  
47  
48  
49  
50  
51  
52  
53  
54  
55  
56  
57  
58  
59  
60

### **Authors' contributions**

KJA conceived the study and built relationship with NHC. KJA, NC, SK developed the overall design of the intervention. NL and KC designed the implementation of the physical activity related intervention. CD and KJA designed the statistical analysis plan for the protocol. DP and GR contributed knowledge of primary care setting and advised on implementing the intervention in a GP clinic. ST designed the implementation of the dietary intervention. NC and SK managed the implementation of the online component in the dedicated web portal. SK, MM, ST, KC, NL, GR, DP, IM, NC and KJA wrote the study protocol and critically reviewed the manuscript.

### **Funding statement**

This work was supported by National Health and Medical Research Council (NHMRC) Centre of Research Excellence in Cognitive Health and development of BBL-GP was funded by NHMRC Dementia Collaborative Research Centres.

This funding source had no role in the design of this study and will not have any role during its execution, analyses, interpretation of the data, or decision to submit results.

### **Acknowledgements**

The investigators acknowledge the work of staff at the National Health Co-op and research staffs at the Centre for Research on Ageing, Health and Wellbeing. The investigators would particularly like to acknowledge the valued contribution of the trial participants.

### **Competing interests**

None declared.

Table 1. Assessment measures at the baseline and follow up evaluations

| Assessment measure       | Baseline | Immediate follow up<br>(Week 7 for LMP and<br>week 13 for BBL-GP<br>and active control<br>group) | Week 18 | Week 36 | Week 62 |
|--------------------------|----------|--------------------------------------------------------------------------------------------------|---------|---------|---------|
| Screening                |          |                                                                                                  |         |         |         |
| APSS                     | √        |                                                                                                  |         |         |         |
| MMSE (if 60+)            | √        |                                                                                                  |         |         |         |
| Questionnaires           |          |                                                                                                  |         |         |         |
| ANU-ADRI                 | √        | √                                                                                                | √       | √       | √       |
| Sleep Quality Assessment | √        | √                                                                                                | √       | √       | √       |
| Diet questionnaire       | √        | √                                                                                                | √       | √       | √       |
| SF-12                    | √        | √                                                                                                | √       | √       | √       |
| MHQ                      | √        |                                                                                                  |         |         |         |

1  
2  
3  
4  
5  
6  
7  
8  
9  
10  
11  
12  
13  
14  
15  
16  
17  
18  
19  
20  
21  
22  
23  
24  
25  
26  
27  
28  
29  
30  
31  
32  
33  
34  
35  
36  
37  
38  
39  
40  
41  
42  
43  
44  
45  
46  
47

|                                                            |   |  |   |   |   |
|------------------------------------------------------------|---|--|---|---|---|
| Cognitive measures                                         |   |  |   |   |   |
| Trails A + B                                               | √ |  | √ | √ | √ |
| Digit symbol matching                                      | √ |  | √ | √ | √ |
| Physical and medical evaluation<br>(by doctors and nurses) |   |  |   |   |   |
| MVPA                                                       | √ |  | √ | √ | √ |
| Blood pressure                                             | √ |  | √ | √ | √ |
| Height, cm                                                 | √ |  |   |   |   |
| Weight, kg                                                 | √ |  | √ | √ | √ |
| Waist and hip, cm                                          | √ |  | √ | √ | √ |
| Body Composition                                           | √ |  | √ | √ | √ |
| Framingham coronary heart                                  | √ |  | √ | √ | √ |
| AUSDRISK                                                   | √ |  | √ | √ | √ |

For peer review only

1  
2  
3  
4  
5 Note: ANU-ADRI: Australian National University – Alzheimer’s Disease Risk Index; SF-12: SF-12 Health Survey; APSS: Adults Pre-exercise  
6  
7 Screening System; MHQ: Multidimensional Health Questionnaire; MMSE: Mini-Mental State Examination; MVPA: Moderate-vigorous  
8  
9 Physical Activity; AUSDRISK: Australian type 2 diabetes risk assessment tool.  
10  
11  
12  
13  
14  
15  
16  
17  
18  
19  
20  
21  
22  
23  
24  
25  
26  
27  
28  
29  
30  
31  
32  
33  
34  
35  
36  
37  
38  
39  
40  
41  
42  
43  
44  
45  
46  
47

For peer review only

1  
2  
3  
4  
5  
6  
7  
8  
9  
10  
11  
12  
13  
14  
15  
16  
17  
18  
19  
20  
21  
22  
23  
24  
25  
26  
27  
28  
29  
30  
31  
32  
33  
34  
35  
36  
37  
38  
39  
40  
41  
42  
43  
44  
45  
46  
47

Table 2: Comparison of intervention programs

|                     | LMP                                                        | BBL-GP                                                                                                               | Active control                                                             |
|---------------------|------------------------------------------------------------|----------------------------------------------------------------------------------------------------------------------|----------------------------------------------------------------------------|
| Previously applied: | Yes, in primary care. Evaluation has not been carried out. | Yes, with member of general public with concern about developing dementia. Never been tested in primary care setting | Yes, with member of general public with concern about developing dementia. |
| Duration            | 6 weeks                                                    | 12 weeks                                                                                                             | 12 weeks                                                                   |
| Frequency           | Weekly                                                     | Weekly                                                                                                               | Weekly                                                                     |
| Number of sessions  | 12 sessions                                                | 8 online sessions, 1 session with dietitian, 1 session with exercise physiologist                                    | 12 emails                                                                  |
| Format              | Face to face group sessions                                | 1 hour individual session with dietitian, 1 hour individual session with exercise physiologist, 8 online modules     | Weekly emails containing health information                                |



Table 3: Description of the 12-week online program delivered through the Body Brain Life – GP (BBL-GP) website

| Week | Activity                                   | Description                                                                                                                                                                                                                                                                                                                                                                                                                                                                                                                                                                                                                       |
|------|--------------------------------------------|-----------------------------------------------------------------------------------------------------------------------------------------------------------------------------------------------------------------------------------------------------------------------------------------------------------------------------------------------------------------------------------------------------------------------------------------------------------------------------------------------------------------------------------------------------------------------------------------------------------------------------------|
| 1    | Module 1: Dementia literacy                | The first module focuses on providing participants with general information about dementia including types, causes, prevalence, social and economic impact, symptoms, brain function, treatment, risk factors (modifiable and non-modifiable), and prevention. This module serves as an introduction to the subsequent modules.                                                                                                                                                                                                                                                                                                   |
| 2    | Module 2: Dementia risk factors            | This module is aimed at building awareness and knowledge of the various health conditions associated with an increased risk of Alzheimer's dementia (AD). Specifically, this module provides details regarding the association between AD and several medical conditions (abnormal weight, high cholesterol, diabetes, hypertension, and depression), as well as lifestyle factors (alcohol use and smoking, physical activity, nutrition, stroke and head injury, mental health, social and cognitive engagement). The module also briefly covers non-modifiable risk factors that contribute to AD, including age and genetics. |
| 3    | Module 3: BBL FIT - physical activity      | This is a theory-driven, individually-tailored module that aims to help participants incorporate regular physical activity into their daily routine and reduce sedentary behaviour by focusing on increasing endurance, strength, balance, and flexibility. This module targets several barriers to engaging in physical activity, such as increasing motivation, creating opportunities to exercise, and developing a social network that supports physical activity goals.                                                                                                                                                      |
| 4    | Module 4: BBL nutrition                    | This is a theory-driven, individually-tailored module aimed at helping people develop healthy dietary habits. This module targets the risk associated with abnormal weight, and the protective effects associated with fish intake and other dietary components.                                                                                                                                                                                                                                                                                                                                                                  |
| 5    | Module 5: BBL health self-management       | This is a theory-driven, individually-tailored module aimed at increasing participants' health monitoring and management of chronic health conditions. Because several chronic health conditions such as hypertension, diabetes and high cholesterol, are associated with increased risk for dementia, prevention and appropriate management of such conditions is also likely to be protective against dementia.                                                                                                                                                                                                                 |
| 6    | Module 6: BBL Think – cognitive engagement | This is a theory-driven, individually-tailored module aimed at increasing participants' levels of engagement with mentally stimulating activities such as reading, doing crosswords and visiting museums, which is a protective factor against dementia.                                                                                                                                                                                                                                                                                                                                                                          |

1  
2  
3  
4  
5  
6  
7  
8  
9  
10  
11  
12  
13  
14  
15  
16  
17  
18  
19  
20  
21  
22  
23  
24  
25  
26  
27  
28  
29  
30  
31  
32  
33  
34  
35  
36  
37  
38  
39  
40  
41  
42  
43  
44  
45  
46  
47

|   |                                           |                                                                                                                                                                                                                                                                                                                                           |
|---|-------------------------------------------|-------------------------------------------------------------------------------------------------------------------------------------------------------------------------------------------------------------------------------------------------------------------------------------------------------------------------------------------|
| 7 | Module 7: BBL connect – social engagement | This is a theory-driven, individually-tailored module aimed at increasing participants’ levels of social engagement. The module targets the risk factor for dementia associated with loneliness and depression, and the protective effects of regular social engagement.                                                                  |
| 8 | Module 8: BBL mood                        | This is a theory-driven, individually-tailored module that aims to help participants monitor and maintain good mental health. The module targets risk factors for dementia associated with mental health and mood, focusing on depression and anxiety. Information is provided on symptoms, types, treatment, and tips for managing mood. |
| 9 | 9 to 12 Self-guided online activities     | During these sessions, participants are encouraged to engage in a range of online activities for 1 h, including accessing the many tools they have accumulated during the first 7 weeks. Examples include the goal-setting tool, behaviour-monitoring tool, unhelpful thoughts monitoring tool, videos, and so on.                        |

For peer review only

1  
2  
3 Figure 1. Study Flowchart  
4  
5  
6  
7  
8  
9  
10  
11  
12  
13  
14  
15  
16  
17  
18  
19  
20  
21  
22  
23  
24  
25  
26  
27  
28  
29  
30  
31  
32  
33  
34  
35  
36  
37  
38  
39  
40  
41  
42  
43  
44  
45  
46  
47  
48  
49  
50  
51  
52  
53  
54  
55  
56  
57  
58  
59  
60

For peer review only

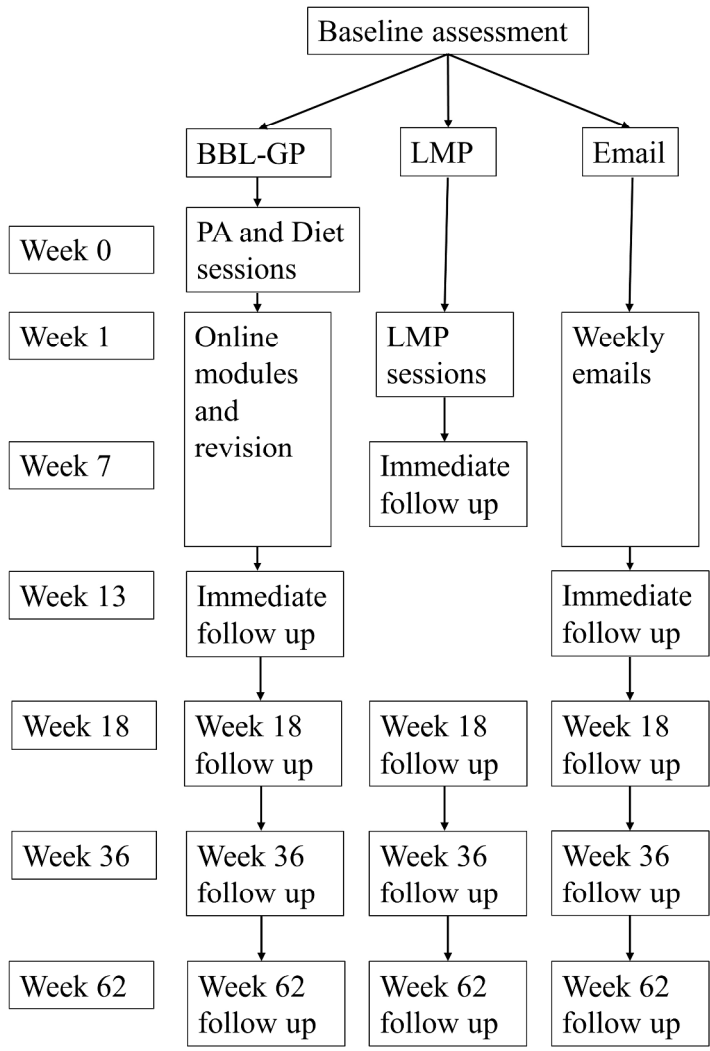

Figure 1: Study Flowchart

225x300mm (300 x 300 DPI)

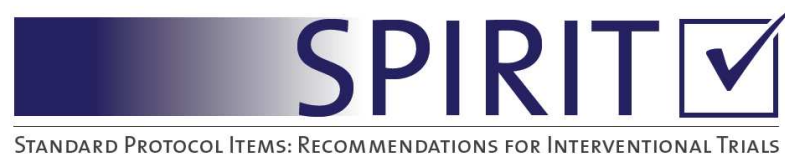

SPIRIT 2013 Checklist: Recommended items to address in a clinical trial protocol and related documents\*

| Section/item                      | Item No | Description                                                                                                                                                                                                                                                                              | Addressed on page number |
|-----------------------------------|---------|------------------------------------------------------------------------------------------------------------------------------------------------------------------------------------------------------------------------------------------------------------------------------------------|--------------------------|
| <b>Administrative information</b> |         |                                                                                                                                                                                                                                                                                          |                          |
| Title                             | 1       | Descriptive title identifying the study design, population, interventions, and, if applicable, trial acronym                                                                                                                                                                             | ___1___                  |
| Trial registration                | 2a      | Trial identifier and registry name. If not yet registered, name of intended registry                                                                                                                                                                                                     | ___4, 18___              |
|                                   | 2b      | All items from the World Health Organization Trial Registration Data Set                                                                                                                                                                                                                 | ___N/A___                |
| Protocol version                  | 3       | Date and version identifier                                                                                                                                                                                                                                                              | ___2___                  |
| Funding                           | 4       | Sources and types of financial, material, and other support                                                                                                                                                                                                                              | ___26___                 |
| Roles and responsibilities        | 5a      | Names, affiliations, and roles of protocol contributors                                                                                                                                                                                                                                  | ___1, 26___              |
|                                   | 5b      | Name and contact information for the trial sponsor                                                                                                                                                                                                                                       | ___N/A___                |
|                                   | 5c      | Role of study sponsor and funders, if any, in study design; collection, management, analysis, and interpretation of data; writing of the report; and the decision to submit the report for publication, including whether they will have ultimate authority over any of these activities | ___29___                 |
|                                   | 5d      | Composition, roles, and responsibilities of the coordinating centre, steering committee, endpoint adjudication committee, data management team, and other individuals or groups overseeing the trial, if applicable (see Item 21a for data monitoring committee)                         | ___N/A___                |

1  
2  
3  
4  
5  
6  
7  
8  
9  
10  
11  
12  
13  
14  
15  
16  
17  
18  
19  
20  
21  
22  
23  
24  
25  
26  
27  
28  
29  
30  
31  
32  
33  
34  
35  
36  
37  
38  
39  
40  
41  
42  
43  
44  
45  
46  
47**Introduction**

|                          |    |                                                                                                                                                                                                           |             |
|--------------------------|----|-----------------------------------------------------------------------------------------------------------------------------------------------------------------------------------------------------------|-------------|
| Background and rationale | 6a | Description of research question and justification for undertaking the trial, including summary of relevant studies (published and unpublished) examining benefits and harms for each intervention        | ___ 5-8 ___ |
|                          | 6b | Explanation for choice of comparators                                                                                                                                                                     | ___ 7-8 ___ |
| Objectives               | 7  | Specific objectives or hypotheses                                                                                                                                                                         | ___ 7 ___   |
| Trial design             | 8  | Description of trial design including type of trial (eg, parallel group, crossover, factorial, single group), allocation ratio, and framework (eg, superiority, equivalence, noninferiority, exploratory) | ___ 7 ___   |

**Methods: Participants, interventions, and outcomes**

|                      |     |                                                                                                                                                                                                                                                                                                                                                                                |                   |
|----------------------|-----|--------------------------------------------------------------------------------------------------------------------------------------------------------------------------------------------------------------------------------------------------------------------------------------------------------------------------------------------------------------------------------|-------------------|
| Study setting        | 9   | Description of study settings (eg, community clinic, academic hospital) and list of countries where data will be collected. Reference to where list of study sites can be obtained                                                                                                                                                                                             | ___ 8 ___         |
| Eligibility criteria | 10  | Inclusion and exclusion criteria for participants. If applicable, eligibility criteria for study centres and individuals who will perform the interventions (eg, surgeons, psychotherapists)                                                                                                                                                                                   | ___ 9-11 ___      |
| Interventions        | 11a | Interventions for each group with sufficient detail to allow replication, including how and when they will be administered                                                                                                                                                                                                                                                     | ___ 13-17 ___     |
|                      | 11b | Criteria for discontinuing or modifying allocated interventions for a given trial participant (eg, drug dose change in response to harms, participant request, or improving/worsening disease)                                                                                                                                                                                 | ___ 15 ___        |
|                      | 11c | Strategies to improve adherence to intervention protocols, and any procedures for monitoring adherence (eg, drug tablet return, laboratory tests)                                                                                                                                                                                                                              | ___ 14-16 ___     |
|                      | 11d | Relevant concomitant care and interventions that are permitted or prohibited during the trial                                                                                                                                                                                                                                                                                  | ___ 14-17 ___     |
| Outcomes             | 12  | Primary, secondary, and other outcomes, including the specific measurement variable (eg, systolic blood pressure), analysis metric (eg, change from baseline, final value, time to event), method of aggregation (eg, median, proportion), and time point for each outcome. Explanation of the clinical relevance of chosen efficacy and harm outcomes is strongly recommended | ___ 11-13 ___     |
| Participant timeline | 13  | Time schedule of enrolment, interventions (including any run-ins and washouts), assessments, and visits for participants. A schematic diagram is highly recommended (see Figure)                                                                                                                                                                                               | ___ 11, 27-29 ___ |

|   |             |    |                                                                                                                                                                                       |          |
|---|-------------|----|---------------------------------------------------------------------------------------------------------------------------------------------------------------------------------------|----------|
| 1 |             |    |                                                                                                                                                                                       |          |
| 2 |             |    |                                                                                                                                                                                       |          |
| 3 | Sample size | 14 | Estimated number of participants needed to achieve study objectives and how it was determined, including clinical and statistical assumptions supporting any sample size calculations | ___10___ |
| 4 |             |    |                                                                                                                                                                                       |          |
| 5 | Recruitment | 15 | Strategies for achieving adequate participant enrolment to reach target sample size                                                                                                   | ___9___  |
| 6 |             |    |                                                                                                                                                                                       |          |
| 7 |             |    |                                                                                                                                                                                       |          |

### 8 **Methods: Assignment of interventions (for controlled trials)**

#### 9 Allocation:

|    |                                  |     |                                                                                                                                                                                                                                                                                                                                                          |             |
|----|----------------------------------|-----|----------------------------------------------------------------------------------------------------------------------------------------------------------------------------------------------------------------------------------------------------------------------------------------------------------------------------------------------------------|-------------|
| 10 |                                  |     |                                                                                                                                                                                                                                                                                                                                                          |             |
| 11 |                                  |     |                                                                                                                                                                                                                                                                                                                                                          |             |
| 12 | Sequence generation              | 16a | Method of generating the allocation sequence (eg, computer-generated random numbers), and list of any factors for stratification. To reduce predictability of a random sequence, details of any planned restriction (eg, blocking) should be provided in a separate document that is unavailable to those who enrol participants or assign interventions | ___13___    |
| 13 |                                  |     |                                                                                                                                                                                                                                                                                                                                                          |             |
| 14 |                                  |     |                                                                                                                                                                                                                                                                                                                                                          |             |
| 15 |                                  |     |                                                                                                                                                                                                                                                                                                                                                          |             |
| 16 |                                  |     |                                                                                                                                                                                                                                                                                                                                                          |             |
| 17 | Allocation concealment mechanism | 16b | Mechanism of implementing the allocation sequence (eg, central telephone; sequentially numbered, opaque, sealed envelopes), describing any steps to conceal the sequence until interventions are assigned                                                                                                                                                | ___13___    |
| 18 |                                  |     |                                                                                                                                                                                                                                                                                                                                                          |             |
| 19 |                                  |     |                                                                                                                                                                                                                                                                                                                                                          |             |
| 20 |                                  |     |                                                                                                                                                                                                                                                                                                                                                          |             |
| 21 | Implementation                   | 16c | Who will generate the allocation sequence, who will enrol participants, and who will assign participants to interventions                                                                                                                                                                                                                                | ___13___    |
| 22 |                                  |     |                                                                                                                                                                                                                                                                                                                                                          |             |
| 23 |                                  |     |                                                                                                                                                                                                                                                                                                                                                          |             |
| 24 | Blinding (masking)               | 17a | Who will be blinded after assignment to interventions (eg, trial participants, care providers, outcome assessors, data analysts), and how                                                                                                                                                                                                                | ___17-18___ |
| 25 |                                  |     |                                                                                                                                                                                                                                                                                                                                                          |             |
| 26 |                                  |     |                                                                                                                                                                                                                                                                                                                                                          |             |
| 27 |                                  | 17b | If blinded, circumstances under which unblinding is permissible, and procedure for revealing a participant's allocated intervention during the trial                                                                                                                                                                                                     | ___17___    |
| 28 |                                  |     |                                                                                                                                                                                                                                                                                                                                                          |             |
| 29 |                                  |     |                                                                                                                                                                                                                                                                                                                                                          |             |
| 30 |                                  |     |                                                                                                                                                                                                                                                                                                                                                          |             |

### 31 **Methods: Data collection, management, and analysis**

|    |                         |     |                                                                                                                                                                                                                                                                                                                                                                                                              |             |
|----|-------------------------|-----|--------------------------------------------------------------------------------------------------------------------------------------------------------------------------------------------------------------------------------------------------------------------------------------------------------------------------------------------------------------------------------------------------------------|-------------|
| 32 |                         |     |                                                                                                                                                                                                                                                                                                                                                                                                              |             |
| 33 | Data collection methods | 18a | Plans for assessment and collection of outcome, baseline, and other trial data, including any related processes to promote data quality (eg, duplicate measurements, training of assessors) and a description of study instruments (eg, questionnaires, laboratory tests) along with their reliability and validity, if known. Reference to where data collection forms can be found, if not in the protocol | ___11___    |
| 34 |                         |     |                                                                                                                                                                                                                                                                                                                                                                                                              |             |
| 35 |                         |     |                                                                                                                                                                                                                                                                                                                                                                                                              |             |
| 36 |                         |     |                                                                                                                                                                                                                                                                                                                                                                                                              |             |
| 37 |                         |     |                                                                                                                                                                                                                                                                                                                                                                                                              |             |
| 38 |                         | 18b | Plans to promote participant retention and complete follow-up, including list of any outcome data to be collected for participants who discontinue or deviate from intervention protocols                                                                                                                                                                                                                    | ___16-17___ |
| 39 |                         |     |                                                                                                                                                                                                                                                                                                                                                                                                              |             |
| 40 |                         |     |                                                                                                                                                                                                                                                                                                                                                                                                              |             |
| 41 |                         |     |                                                                                                                                                                                                                                                                                                                                                                                                              |             |
| 42 |                         |     |                                                                                                                                                                                                                                                                                                                                                                                                              |             |
| 43 |                         |     |                                                                                                                                                                                                                                                                                                                                                                                                              |             |
| 44 |                         |     |                                                                                                                                                                                                                                                                                                                                                                                                              |             |
| 45 |                         |     |                                                                                                                                                                                                                                                                                                                                                                                                              |             |
| 46 |                         |     |                                                                                                                                                                                                                                                                                                                                                                                                              |             |
| 47 |                         |     |                                                                                                                                                                                                                                                                                                                                                                                                              |             |

1  
2  
3  
4  
5  
6  
7  
8  
9  
10  
11  
12  
13  
14  
15  
16  
17  
18  
19  
20  
21  
22  
23  
24  
25  
26  
27  
28  
29  
30  
31  
32  
33  
34  
35  
36  
37  
38  
39  
40  
41  
42  
43  
44  
45  
46  
47

|                 |    |                                                                                                                                                                                                                                                                   |          |
|-----------------|----|-------------------------------------------------------------------------------------------------------------------------------------------------------------------------------------------------------------------------------------------------------------------|----------|
| Data management | 19 | Plans for data entry, coding, security, and storage, including any related processes to promote data quality (eg, double data entry; range checks for data values). Reference to where details of data management procedures can be found, if not in the protocol | ___18___ |
|-----------------|----|-------------------------------------------------------------------------------------------------------------------------------------------------------------------------------------------------------------------------------------------------------------------|----------|

|                     |     |                                                                                                                                                                          |          |
|---------------------|-----|--------------------------------------------------------------------------------------------------------------------------------------------------------------------------|----------|
| Statistical methods | 20a | Statistical methods for analysing primary and secondary outcomes. Reference to where other details of the statistical analysis plan can be found, if not in the protocol | ___18___ |
|---------------------|-----|--------------------------------------------------------------------------------------------------------------------------------------------------------------------------|----------|

|  |     |                                                                          |          |
|--|-----|--------------------------------------------------------------------------|----------|
|  | 20b | Methods for any additional analyses (eg, subgroup and adjusted analyses) | ___18___ |
|--|-----|--------------------------------------------------------------------------|----------|

|  |     |                                                                                                                                                                                 |          |
|--|-----|---------------------------------------------------------------------------------------------------------------------------------------------------------------------------------|----------|
|  | 20c | Definition of analysis population relating to protocol non-adherence (eg, as randomised analysis), and any statistical methods to handle missing data (eg, multiple imputation) | ___18___ |
|--|-----|---------------------------------------------------------------------------------------------------------------------------------------------------------------------------------|----------|

**Methods: Monitoring**

|                 |     |                                                                                                                                                                                                                                                                                                                                       |          |
|-----------------|-----|---------------------------------------------------------------------------------------------------------------------------------------------------------------------------------------------------------------------------------------------------------------------------------------------------------------------------------------|----------|
| Data monitoring | 21a | Composition of data monitoring committee (DMC); summary of its role and reporting structure; statement of whether it is independent from the sponsor and competing interests; and reference to where further details about its charter can be found, if not in the protocol. Alternatively, an explanation of why a DMC is not needed | ___19___ |
|-----------------|-----|---------------------------------------------------------------------------------------------------------------------------------------------------------------------------------------------------------------------------------------------------------------------------------------------------------------------------------------|----------|

|  |     |                                                                                                                                                                         |          |
|--|-----|-------------------------------------------------------------------------------------------------------------------------------------------------------------------------|----------|
|  | 21b | Description of any interim analyses and stopping guidelines, including who will have access to these interim results and make the final decision to terminate the trial | ___19___ |
|--|-----|-------------------------------------------------------------------------------------------------------------------------------------------------------------------------|----------|

|       |    |                                                                                                                                                                                   |             |
|-------|----|-----------------------------------------------------------------------------------------------------------------------------------------------------------------------------------|-------------|
| Harms | 22 | Plans for collecting, assessing, reporting, and managing solicited and spontaneously reported adverse events and other unintended effects of trial interventions or trial conduct | ___18-19___ |
|-------|----|-----------------------------------------------------------------------------------------------------------------------------------------------------------------------------------|-------------|

|          |    |                                                                                                                                             |                    |
|----------|----|---------------------------------------------------------------------------------------------------------------------------------------------|--------------------|
| Auditing | 23 | Frequency and procedures for auditing trial conduct, if any, and whether the process will be independent from investigators and the sponsor | ___15-17, 18-19___ |
|----------|----|---------------------------------------------------------------------------------------------------------------------------------------------|--------------------|

**Ethics and dissemination**

|                          |    |                                                                                           |          |
|--------------------------|----|-------------------------------------------------------------------------------------------|----------|
| Research ethics approval | 24 | Plans for seeking research ethics committee/institutional review board (REC/IRB) approval | ___18___ |
|--------------------------|----|-------------------------------------------------------------------------------------------|----------|

|                     |    |                                                                                                                                                                                                                                  |          |
|---------------------|----|----------------------------------------------------------------------------------------------------------------------------------------------------------------------------------------------------------------------------------|----------|
| Protocol amendments | 25 | Plans for communicating important protocol modifications (eg, changes to eligibility criteria, outcomes, analyses) to relevant parties (eg, investigators, REC/IRBs, trial participants, trial registries, journals, regulators) | ___18___ |
|---------------------|----|----------------------------------------------------------------------------------------------------------------------------------------------------------------------------------------------------------------------------------|----------|





|    |                               |     |                                                                                                                                                                                                                                                                                     |             |
|----|-------------------------------|-----|-------------------------------------------------------------------------------------------------------------------------------------------------------------------------------------------------------------------------------------------------------------------------------------|-------------|
| 1  |                               |     |                                                                                                                                                                                                                                                                                     |             |
| 2  |                               |     |                                                                                                                                                                                                                                                                                     |             |
| 3  | Consent or assent             | 26a | Who will obtain informed consent or assent from potential trial participants or authorised surrogates, and how (see Item 32)                                                                                                                                                        | ___9___     |
| 4  |                               |     |                                                                                                                                                                                                                                                                                     |             |
| 5  |                               |     |                                                                                                                                                                                                                                                                                     |             |
| 6  |                               | 26b | Additional consent provisions for collection and use of participant data and biological specimens in ancillary studies, if applicable                                                                                                                                               | ___N/A___   |
| 7  |                               |     |                                                                                                                                                                                                                                                                                     |             |
| 8  | Confidentiality               | 27  | How personal information about potential and enrolled participants will be collected, shared, and maintained in order to protect confidentiality before, during, and after the trial                                                                                                | ___9, 18___ |
| 9  |                               |     |                                                                                                                                                                                                                                                                                     |             |
| 10 |                               |     |                                                                                                                                                                                                                                                                                     |             |
| 11 | Declaration of interests      | 28  | Financial and other competing interests for principal investigators for the overall trial and each study site                                                                                                                                                                       | ___26___    |
| 12 |                               |     |                                                                                                                                                                                                                                                                                     |             |
| 13 |                               |     |                                                                                                                                                                                                                                                                                     |             |
| 14 | Access to data                | 29  | Statement of who will have access to the final trial dataset, and disclosure of contractual agreements that limit such access for investigators                                                                                                                                     | ___18___    |
| 15 |                               |     |                                                                                                                                                                                                                                                                                     |             |
| 16 |                               |     |                                                                                                                                                                                                                                                                                     |             |
| 17 | Ancillary and post-trial care | 30  | Provisions, if any, for ancillary and post-trial care, and for compensation to those who suffer harm from trial participation                                                                                                                                                       | ___N/A___   |
| 18 |                               |     |                                                                                                                                                                                                                                                                                     |             |
| 19 |                               |     |                                                                                                                                                                                                                                                                                     |             |
| 20 | Dissemination policy          | 31a | Plans for investigators and sponsor to communicate trial results to participants, healthcare professionals, the public, and other relevant groups (eg, via publication, reporting in results databases, or other data sharing arrangements), including any publication restrictions | ___19___    |
| 21 |                               |     |                                                                                                                                                                                                                                                                                     |             |
| 22 |                               |     |                                                                                                                                                                                                                                                                                     |             |
| 23 |                               |     |                                                                                                                                                                                                                                                                                     |             |
| 24 |                               |     |                                                                                                                                                                                                                                                                                     |             |
| 25 |                               | 31b | Authorship eligibility guidelines and any intended use of professional writers                                                                                                                                                                                                      | ___19___    |
| 26 |                               |     |                                                                                                                                                                                                                                                                                     |             |
| 27 |                               | 31c | Plans, if any, for granting public access to the full protocol, participant-level dataset, and statistical code                                                                                                                                                                     | ___N/A___   |
| 28 |                               |     |                                                                                                                                                                                                                                                                                     |             |
| 29 | <b>Appendices</b>             |     |                                                                                                                                                                                                                                                                                     |             |
| 30 |                               |     |                                                                                                                                                                                                                                                                                     |             |
| 31 | Informed consent materials    | 32  | Model consent form and other related documentation given to participants and authorised surrogates                                                                                                                                                                                  | ___N/A___   |
| 32 |                               |     |                                                                                                                                                                                                                                                                                     |             |
| 33 |                               |     |                                                                                                                                                                                                                                                                                     |             |
| 34 | Biological specimens          | 33  | Plans for collection, laboratory evaluation, and storage of biological specimens for genetic or molecular analysis in the current trial and for future use in ancillary studies, if applicable                                                                                      | ___N/A___   |
| 35 |                               |     |                                                                                                                                                                                                                                                                                     |             |
| 36 |                               |     |                                                                                                                                                                                                                                                                                     |             |

37 \*It is strongly recommended that this checklist be read in conjunction with the SPIRIT 2013 Explanation & Elaboration for important clarification on the items.  
 38 Amendments to the protocol should be tracked and dated. The SPIRIT checklist is copyrighted by the SPIRIT Group under the Creative Commons  
 39 "[Attribution-NonCommercial-NoDerivs 3.0 Unported](https://creativecommons.org/licenses/by-nc-nd/3.0/)" license.  
 40

# BMJ Open

## Protocol for a pragmatic randomised controlled trial of Body Brain Life – GP and a Lifestyle Modification Program to decrease dementia risk exposure in a primary care setting

|                                 |                                                                                                                                                                                                                                                                                                                                                                                                                                                                                                                                                                                                                                                                                                                                                                                                                                                                                                                       |
|---------------------------------|-----------------------------------------------------------------------------------------------------------------------------------------------------------------------------------------------------------------------------------------------------------------------------------------------------------------------------------------------------------------------------------------------------------------------------------------------------------------------------------------------------------------------------------------------------------------------------------------------------------------------------------------------------------------------------------------------------------------------------------------------------------------------------------------------------------------------------------------------------------------------------------------------------------------------|
| Journal:                        | <i>BMJ Open</i>                                                                                                                                                                                                                                                                                                                                                                                                                                                                                                                                                                                                                                                                                                                                                                                                                                                                                                       |
| Manuscript ID                   | bmjopen-2017-019329.R2                                                                                                                                                                                                                                                                                                                                                                                                                                                                                                                                                                                                                                                                                                                                                                                                                                                                                                |
| Article Type:                   | Protocol                                                                                                                                                                                                                                                                                                                                                                                                                                                                                                                                                                                                                                                                                                                                                                                                                                                                                                              |
| Date Submitted by the Author:   | 23-Jan-2018                                                                                                                                                                                                                                                                                                                                                                                                                                                                                                                                                                                                                                                                                                                                                                                                                                                                                                           |
| Complete List of Authors:       | Kim, Sarang; Australian National University, Centre for Research on Ageing, Health and Wellbeing<br>McMaster, Mitchell; Australian National University, Centre for Research on Ageing, Health and Wellbeing<br>Torres, Susan ; Deakin University<br>Cox, Kay L.<br>Lautenschlager, Nicola; University of Melbourne, Academic Unit of Psychiatry of Old Age<br>Rebok, George; Johns Hopkins Bloomberg School of Public Health, Psychiatry and Behavioral Sciences<br>Pond, Dimity; University of Newcastle Australia, General Practice<br>D'Este, Catherine; ANU College of Medicine, Biology and Environment The Australian National University, National Centre for Epidemiology and Population Health (NCEPH)<br>McRae, Ian; Australian National University, School of Population Health<br>Cherbuin, Nicolas; Australian National University, Centre for Research on Ageing, Health and Wellbing<br>Anstey, Kaarin |
| <b>Primary Subject Heading</b>: | Public health                                                                                                                                                                                                                                                                                                                                                                                                                                                                                                                                                                                                                                                                                                                                                                                                                                                                                                         |
| Secondary Subject Heading:      | Medical education and training                                                                                                                                                                                                                                                                                                                                                                                                                                                                                                                                                                                                                                                                                                                                                                                                                                                                                        |
| Keywords:                       | RCT, Dementia < NEUROLOGY, Lifestyle change, online, Australia, General practice                                                                                                                                                                                                                                                                                                                                                                                                                                                                                                                                                                                                                                                                                                                                                                                                                                      |
|                                 |                                                                                                                                                                                                                                                                                                                                                                                                                                                                                                                                                                                                                                                                                                                                                                                                                                                                                                                       |

SCHOLARONE™  
Manuscripts

1  
2  
3  
4  
5  
6 Protocol for a pragmatic randomised controlled trial of Body Brain Life – GP and a Lifestyle  
7  
8 Modification Program to decrease dementia risk exposure in a primary care setting  
9  
10  
11  
12  
13  
14  
15  
16  
17

18  
19 Authors: Sarang Kim<sup>1\*</sup>, Mitchell McMaster<sup>1</sup>, Susan Torres<sup>2</sup>, Kay Cox<sup>3</sup>, Nicola  
20  
21 Lautenschlager<sup>4</sup>, George Rebok<sup>5</sup>, Dimity Pond<sup>6</sup>, Catherine D’Este<sup>7</sup>, Ian McRae<sup>1</sup>, Nicolas  
22  
23 Cherbuin<sup>1</sup>, Kaarin J Anstey<sup>1</sup>  
24  
25  
26  
27

28  
29 <sup>1</sup> Centre for Research on Ageing Health & Wellbeing, Australian National University,  
30  
31 Canberra, Australia  
32

33  
34 <sup>2</sup> School of Exercise and Nutrition Sciences, Deakin University, Burwood, Australia  
35

36  
37 <sup>3</sup> University of Western Australia Medical School, Crawley, Australia  
38

39  
40 <sup>4</sup> Academic Unit for Psychiatry of Old Age, University of Melbourne, Melbourne, Australia  
41

42  
43 <sup>5</sup> Johns Hopkins Center on Aging and Health, Baltimore, USA  
44

45  
46 <sup>6</sup> School of Medicine and Public Health, University of Newcastle, Callaghan, Australia  
47

48  
49 <sup>7</sup> National Centre for Epidemiology & Population Health, Australian National University,  
50  
51 Canberra, Australia  
52  
53  
54  
55  
56  
57  
58  
59  
60

1  
2  
3  
4  
5  
6 Corresponding author:  
7

8 Dr Sarang Kim  
9

10 Centre for Research on Ageing Health & Wellbeing, Building 54, Mills Road, Australian  
11  
12

13 National University, Acton ACT 2601, Australia  
14  
15

16 E: [sarang.kim@anu.edu.au](mailto:sarang.kim@anu.edu.au)  
17

18  
19 T: +61 2 6125 0713  
20  
21  
22  
23

24 Word count: 4942  
25  
26

27 Issue date: 22 January 2018  
28  
29

30 Protocol Amendment Number: 02  
31  
32  
33  
34  
35  
36  
37  
38  
39  
40  
41  
42  
43  
44  
45  
46  
47  
48  
49  
50  
51  
52  
53  
54  
55  
56  
57  
58  
59  
60

## Abstract

**Introduction:** It has been estimated that a 10% to 25% reduction in seven key risk factors could potentially prevent 1.1 to 3.0 million Alzheimer's disease cases globally. In addition, as dementia is preceded by more subtle cognitive deficits which have substantial social and economic impact, effective preventative interventions would likely have more extensive benefits. The current study evaluates in primary care a multi-domain risk reduction intervention targeting adults with high risk of developing dementia.

**Methods and analysis:** A randomised controlled trial (RCT) is being conducted to evaluate three intervention programs using a pragmatic approach suitable to the clinic: 1) A 12-week online and face-to-face dementia risk reduction intervention (BBL-GP); 2) A 6-week face-to-face group lifestyle modification program (LMP); and 3) A 12-week email-only program providing general health information. We aim to recruit 240 participants, aged 18 and over, to undergo a comprehensive cognitive and physical assessment at baseline and follow ups (post intervention, 18, 36 and 62 weeks). The primary outcome is dementia risk measured with the modified version of the ANU-ADRI-Short Form. Secondary outcomes are cognitive function measured with Trail A and B, and the DSMT; physical activity with Moderate-Vigorous Physical Activity and the IPAQ; depression with the CES-D; cost evaluation with the SF-12 health survey, Framingham CHD, and AUSDRISK; diet quality with the ARFS; and sleep quality with the PSQI.

**Ethics and dissemination:** This RCT is a novel pragmatic intervention applied in a primary care setting to reduce the dementia risk exposure in adults at high risk. If successful, BBL-GP and LMP will provide a versatile, evidence-based package that can be easily and quickly rolled-out to other primary care settings and which can be scaled up at relatively low cost compared to other strategies involving intensive interventions.

1  
2  
3 Trial registration: Reg. no. ACTRN12616000868482  
4  
5  
6  
7

8 Keywords: RCT, dementia, lifestyle change, online, physical activity, diet, cardiovascular  
9  
10 risk factors, Australia, general practice, primary care.  
11  
12  
13  
14  
15  
16  
17  
18  
19  
20  
21  
22  
23  
24  
25  
26  
27  
28  
29  
30  
31  
32  
33  
34  
35  
36  
37  
38  
39  
40  
41  
42  
43  
44  
45  
46  
47  
48  
49  
50  
51  
52  
53  
54  
55  
56  
57  
58  
59  
60

For peer review only

### Strengths and limitations of this study

- BBL-GP program has been built on our dementia prevention research program which has been shown to reduce cognitive decline in older adults at-risk of dementia.
- This pragmatic trial evaluates a multi-domain risk reduction intervention in primary care targeting adults at increased risk of developing dementia.
- A naturalistic approach ensures the program can be adapted efficiently in primary care settings if proven effective.
- We are aware that most of our outcomes are self-reported and therefore can be subjective. Accordingly, we will interpret data conservatively.

## Introduction

No cure is available for Alzheimer's disease and other types of dementia. However, it is estimated that an achievable 10% to 25% reduction in seven key risk factors could prevent 1.1 to 3.0 million Alzheimer's disease (AD) cases internationally (1). It is also estimated that if each of seven risk factors was to be reduced by 5%, 10%, 15% and 20% per decade, dementia prevalence would be reduced by between 1.6 and 7.2% in 2020, 3.3-14.9% in 2030, 4-9 – 22.8% in 2040 and 6.6-30.7% in 2050 (2). Furthermore, as dementia is preceded by more subtle cognitive deficits which have substantial social and economic impacts, effective preventative interventions would likely have additional benefits.

Increasingly and to afford a greater chance of producing detectable changes during study timeframes, the dementia research community has focused on multi-domain interventions that address multiple risk factors simultaneously (3). Among individuals with high risk factor burden, cognitive decline can be reduced (and possibly reversed) as a result of cardiovascular risk reduction and increase in activities that stimulate and protect the brain including cognitive, social and physical activity and an appropriate diet (4). Alzheimer's disease and cardiovascular disease share cardiometabolic and lifestyle risk factors and cardiovascular risk reduction can be achieved by smoking cessation, increasing physical activities, adopting a healthy diet, reducing abnormally high blood pressure and cholesterol in mid-life, and managing major depression, overweight/obesity in mid-life and diabetes if present (5). Altogether, the literature supports the view that multi-domain interventions aimed at reducing cardiometabolic risk and promoting behaviours shown to protect against dementia will contribute to preventing cognitive decline, reduce overall risk of AD, and lower depressive symptoms.

Insufficient physical activity is the risk factor with the most evidence to support its role as a treatment for Mild Cognitive Impairment (MCI) (6) and more generally cognitive



1  
2  
3 decline (7). Physical activity has also been shown in RCTs to benefit several other risk  
4 factors for dementia including depression (8), and cardiovascular risk factors (9). Physical  
5 activity not only modifies multiple risk factors but it has direct benefits for brain health and  
6 cognition.  
7  
8  
9

10  
11 To bring about risk reduction, there needs to be long-lasting behavioural change in  
12 multiple areas. Achieving this requires using techniques such as goal setting, decreasing  
13 barriers to change, improving self-monitoring, having access to information, and maintaining  
14 motivation (10, 11). Therefore, this RCT investigates whether lifestyle management  
15 programs that offer not only health promoting information, but also practical behaviour  
16 change techniques which can be implemented in daily life can reduce dementia risk.  
17  
18  
19

#### 20 21 22 *Recruitment in general practice setting*

23  
24  
25  
26 Primary care is an ideal setting for the implementation of the current program because  
27 it is where adults with high risk of developing dementia are identified and early intervention  
28 and treatment are provided (12). Assessment of cardiovascular risk factors is common in  
29 primary care, as is advice about physical activity and diet. General practitioners (GP)  
30 commonly screen for diabetes and increasingly identify depression. GPs are often the first  
31 point of contact for patients who are worried that they may have dementia (13).  
32  
33  
34  
35  
36  
37  
38

39  
40 Although there has been one study conducted in primary care setting with elderly  
41 participants (70-78 years old) addressing cardiovascular risk factors (14), the current program  
42 is the first of its kind to provide interventions to adults (18 years and above) at the primary  
43 care setting, addressing both cardiovascular and lifestyle risk factors of dementia.  
44  
45  
46  
47

#### 48 49 **Methods and analysis**

##### 50 51 *Study setting and design*

52  
53 This project is a 6-12 week, pragmatic single-blind randomised controlled trial that is  
54 designed to assist participants develop and maintain a healthy lifestyle, as well as manage  
55  
56  
57  
58  
59  
60

1  
2  
3 chronic diseases. The study evaluates the implementation of an evidence-based dementia risk  
4 reduction program that we developed and have evaluated previously on volunteers (15) and  
5 which has now been adapted for primary care (BBL-GP). The primary care setting in which  
6 the study is held already conducted a lifestyle management program (LMP) aimed at helping  
7 to manage chronic disease and maintaining a healthy lifestyle. The LMP program was  
8 initially developed to consist of 12 sessions over 12 weeks. However, its format was changed  
9 prior to this trial to have 12 sessions over 6 weeks. This decision was made by the clinic  
10 which provides this program in order for the program to be offered 4 times a year. The  
11 current LMP program was chosen as a comparison condition for feasibility and to enable  
12 evaluation of an existing program for dementia and cardiovascular risk reduction. The  
13 efficacy of the existing LMP program had not previously been evaluated.

14  
15  
16  
17  
18  
19  
20  
21  
22  
23  
24  
25  
26  
27 The existing LMP program included 6 weeks of face-to-face group education sessions.  
28  
29 The BBL-GP program included 12 weeks of individually tailored online education sessions  
30 with one hour face-to-face individual sessions with a dietitian and an exercise physiologist.  
31  
32 The BBL-GP and LMP are being compared to an active control group receiving weekly email  
33 with links to health information. The study is being conducted in Canberra, Australian  
34  
35  
36  
37  
38  
39  
40  
41  
42  
43  
44  
45  
46  
47  
48  
49  
50  
51  
52  
53  
54  
55  
56  
57  
58  
59  
60  
The BBL-GP and LMP are being compared to an active control group receiving weekly email with links to health information. The study is being conducted in Canberra, Australian Capital Territory, Australia. The trial has been designed and is conducted according to the Consolidated Standards of Reporting Trials (CONSORT) statements for non-pharmaceutical (16) and pragmatic (17) trials and is reported according to the Standard Protocol Items: Recommendations for Intervention Trials (SPIRIT) guidelines (18).

### *Participants*

Participants are being recruited from the National Health Co-op (NHC), the largest bulk billing general practice organisation in Canberra comprising of eight clinics. Bulk Billing is a payment option where the doctor bills directly the universal health insurance system (Medicare) in Australia for a medical service that the patients receive. Invitation emails have

1  
2  
3 been sent to all members excluding members who are inactive (those who did not renew their  
4 memberships), those aged less than 18 years, or without email addresses. Posters at the  
5 clinics are also being used for the recruitment. Potential participants who express their  
6 interest by contacting the LMP coordinator at the NHC or registering on the NHC's website  
7 are assessed against the inclusion and exclusion criteria. These are the types of adults who a  
8 GP would refer to a dementia risk reduction trial in 'real life' and on whom we are aiming to  
9 evaluate our intervention in a naturalistic context. In addition, risk factors for dementia exert  
10 their influence over decades and thus the earlier one decreases their risk exposure, the more  
11 impact it is likely to have over their lifespan. Therefore, this intervention program is open to  
12 anyone aged 18 and older. If criteria are met, information sheets and consent forms are sent to  
13 potential participants. Upon return of consent forms via email, each participant is officially  
14 registered to the study and allocated a unique identity numbers as well as an online account.  
15 Recruitment began in July 2016 for the duration of 13 months.

### 31 *Inclusion criteria*

32  
33  
34 A naturalistic approach is used in recruitment and the study inclusion criteria being used for  
35 this study are those already used by the NHC to refer patients to the LMP program (prior to  
36 this research project). The inclusion criteria is pragmatic as the practice already had criteria  
37 for referral to their LMP and in developing the protocol, it became clear that introducing a  
38 second set of inclusion criteria would make implementation difficult and reduce participant  
39 numbers. We therefore decided to use the principle that if a GP would refer the patient to the  
40 LMP then they would be eligible for the trial. This is a pragmatic feature of the current trial  
41 that significantly differs from our original BBL trial. We aimed to optimise the seamlessness  
42 of the intervention in primary care and utilise existing referral pathways to increase the  
43 probability that the intervention is conducted in a manner that could lead to implementation  
44 in real life. Participants must be aged 18 years and over, reside in the Australian Capital  
45  
46  
47  
48  
49  
50  
51  
52  
53  
54  
55  
56  
57  
58  
59  
60

1  
2  
3 Territory, be current financial members of the NHC, have access to a computer and internet  
4 connection at home, be fluent in English, Australian permanent residents or citizens (for bulk  
5 billing eligibility), and must be the only person in their household who is taking part in this  
6 study to prevent being randomly assigned to different groups and sharing information about  
7 their interventions with each other received. To be eligible for the study, participants are also  
8 required to have a chronic health condition (high blood pressure, heart disease, type 2  
9 diabetes or 'pre-diabetes', osteoporosis, osteoarthritis, polycystic ovary syndrome (PCOS),  
10 kidney or liver disease, and depression/anxiety) or be overweight or obese (BMI>25). They  
11 are also required to agree to commit 1-2 hours a week to complete the program and be  
12 interested in obtaining advice on improving their lifestyle to reduce the risk of or better  
13 manage chronic disease. Participants are required to complete online assessments and attend  
14 NHC at baseline and 18, 36, and 62 weeks after commencement of the intervention for  
15 medical and cognitive assessments.  
16  
17  
18  
19  
20  
21  
22  
23  
24  
25  
26  
27  
28  
29

### 30 31 *Exclusion criteria*

32  
33  
34 Participants are not eligible to enrol in the trial if they have significant and unstable medical  
35 and psychiatric conditions that would prevent participation in the trial. They are also  
36 ineligible if they have sensory deficits or mobility limitations that would prevent or  
37 substantially restrict the delivery of the assessment or intervention, have cognitive  
38 impairment, or are pregnant. Those who have previously participated in the LMP were  
39 excluded from participation. However, those who may be/have been participating in other  
40 trials, unknown to authors, were not excluded.  
41  
42  
43  
44  
45  
46  
47  
48  
49

### 50 *Sample size calculations*

51  
52  
53 Sample size calculations were estimated using G\*Power (version 3.1.9.2;  
54 <http://www.gpower.hhu.de/en.html>) and have been based on medium effect size as  
55  
56  
57  
58  
59  
60

1  
2  
3 observed in the previous Body Brain Life project with same primary outcome (19). To  
4 detect a medium effect (0.5 standard deviation (SD)) in a 3-group design (1:1:1), 4  
5 measurements with a 5% risk of type 1 error ( $\alpha$ ) and 80% power, a total sample size of  
6  
7 159 persons is required. To account for a 33% attrition (based on previous lifestyle  
8  
9 modification program by NHC using the same inclusion and exclusion criteria and  
10  
11 targeting same age group), a baseline sample of 240 is being recruited (80 in BBL-GP  
12  
13 group, 80 in LMP group and 80 in control group).  
14  
15

### 16 17 18 *Assessments*

19  
20  
21 Participants who meet all inclusion and no exclusion criteria are invited to complete online  
22  
23 surveys and visit NHC for the baseline evaluation, and for week 18, 36, and 62 follow ups.  
24  
25 Immediate follow up is also conducted online at week 7 for LMP, and week 13 for BBL-GP  
26  
27 and control groups. Table 1 summarises the assessment measures and schedule.  
28  
29

### 30 31 *Screening measures and covariate*

32  
33 In addition to the above inclusion and exclusion criteria, further screening measures are  
34  
35 conducted to ensure that participants are capable of taking part in the study. The Adult Pre-  
36  
37 exercise Screening System (APSS) (20) is used at the baseline assessment to identify  
38  
39 individuals with acute/high risk conditions, or who may be at higher risk of an adverse event  
40  
41 during exercise. To screen for any cognitive impairment (<25), the Mini-Mental State  
42  
43 Examination (MMSE) (21) is administered to participants aged 60 and older.  
44  
45

46  
47 Health efficacy and motivation for healthiness subscales from the Multidimensional  
48  
49 Health Questionnaire (MHQ) (22) is used to measure the extent to which people believe they  
50  
51 have the ability, capability, skills and talents to take care of their own physical health, and to  
52  
53 measure people's motivation to keep in good physical health.  
54  
55

### 56 57 *Primary outcome*

1  
2  
3 The primary outcome is one's exposure profile to demonstrated risk factors for Alzheimer's  
4 disease. It is measured with a modified version of the Australian National University  
5 Alzheimer's Disease Risk Index – Short form (ANU-ADRI – SF) (23). The ANU-ADRI-SF  
6 is comprised of validated scales assessing 15 individual risk and protective factors for  
7 Alzheimer's disease and dementia. Intra class correlation coefficients suggested that the  
8 reliability of the ANU-ADRI-SF compared to the original ANU-ADRI were moderate to  
9 strong (0.77 to 0.99) and statistically significant ( $p < .001$ ) except for cognitive activity.  
10 Therefore, for the assessment of engagement in cognitive activities levels only, items from  
11 the original ANU-ADRI (19, 24) are used in place of those from the ANU-ADRI-SF due to  
12 limitations of the latter.  
13  
14  
15  
16  
17  
18  
19  
20  
21  
22  
23

#### 24 25 *Secondary outcomes*

26  
27 Secondary outcomes include cognitive function, physical activity level, depressive symptoms,  
28 cost of interventions, diet and sleep quality. They are measured as follows: cognitive function  
29 is assessed with processing speed, task switching and executive function using Trails A and B,  
30 and the Digit Symbol Modalities Test (DSMT). These tests were chosen because the  
31 executive function is the most sensitive cognitive domain to physical activity interventions  
32 (25) and a decline in processing speed is associated with cardiovascular risk factors (26).  
33 Both Trails and DSMT have been used widely and have been reported to have good  
34 reliability and validity (27-30). Moderate-vigorous Physical Activity (MVPA) is a continuous  
35 measure of activity that registers three or more Metabolic Equivalents (METs) for 10 minutes  
36 or longer on an ActiGraph Link activity monitor  
37 (<http://actigraphcorp.com/products/actigraph-link/>), which is worn for 7 days. Self-reported  
38 physical activity is also being recorded using the short form of the International Physical  
39 Activity Questionnaire (IPAQ) (31), which is part of the ANU-ADRI-SF. Reliability and  
40 validity of IPAQ has been tested and confirmed across 12 countries (31). Depression is being  
41  
42  
43  
44  
45  
46  
47  
48  
49  
50  
51  
52  
53  
54  
55  
56  
57  
58  
59  
60

1  
2  
3 assessed with the Centre for Epidemiological Studies Depression (CES-D) Scale (32), which  
4 is also part of the ANU-ADRI. CES-D scale has a very high internal consistency and validity  
5  
6  
7 (33).  
8  
9

10 Health outcomes are assessed with the SF-12 health survey (34), Framingham  
11 Coronary Heart Disease (CHD) Risk score (35), and Australian type 2 diabetes risk  
12 assessment tool (AUSDRISK) (36) to enable cost effectiveness evaluation of the two health  
13 promotion interventions. SF-12 measures both physical and mental health status and has  
14 acceptable validity and reliability (37, 38). Framingham CHD is a validated tool to assess  
15 cardiovascular diseases (39) and AUSDRISK is a diabetes risk assessment tool based on  
16 demographic, lifestyle and simple anthropometric measures (36).  
17  
18  
19  
20  
21  
22  
23  
24

25 Dietary quality is assessed with a food-based diet quality index, the Australian  
26 Recommended Food Score (ARFS) (40). The ARFS is aligned with Australian Dietary  
27 Guidelines (41) and the Australian Guide to Healthy Eating (42) recommendations. The  
28 ARFS total ranges from 0 to 73 and includes eight subscales: vegetables (0 to 21), fruit (0 to  
29 12), protein (0 to 7), vegetarian alternatives (0 to 6), grains (0 to 13), dairy (0 to 11), water (0  
30 to 1), sauces and condiments (0 to 2). Higher scores indicate greater compliance with the  
31 Australian Dietary Guidelines and therefore better diet quality. The ARFS has demonstrated  
32 good validity and reproducibility (40).  
33  
34  
35  
36  
37  
38  
39  
40  
41  
42

43 Lastly, the Pittsburgh Sleep Quality Index (PSQI) (43) is an effective instrument used  
44 to measure the quality and patterns of sleep in adults. It differentiates “poor” from “good”  
45 sleep quality by measuring seven areas (components): subjective sleep quality, sleep latency,  
46 sleep duration, habitual sleep efficiency, sleep disturbances, use of sleeping medications, and  
47 daytime dysfunction over the last month. PSQI reports great test-retest reliability (0.87) and  
48 high correlations with sleep log data (44).  
49  
50  
51  
52  
53  
54  
55  
56  
57  
58  
59  
60

### *Randomisation*

Upon completion of the baseline assessment, participants are randomly allocated into one of the three groups (see Table 2 and Figure 1). The allocation sequence is computer generated by an independent researcher and is not known to the study team at the time of enrolment and baseline assessment. A permuted block randomisation sequence comprising block sizes of 6 stratified by gender and age group (18-49 vs 50+) is used. The project manager who is not involved with conducting assessments assigns the participants into groups according to the generated sequence and notifies participants of their group allocation via email.

### *Interventions*

#### *Group 1: Body Brain Life – General Practice (BBL-GP)*

BBL-GP is an intervention package that builds on our dementia prevention research programs. This includes an online dementia risk reduction program called the Body Brain Life (BBL; Trial ID: ACTRN12612000147886) (15, 45) and the Fitness for the Ageing Brain Study (FABS; Trial ID: ACTRN 12609000755235) (46, 47). Contents for the BBL-GP online modules have been revised after extensive consumer evaluation by members of the Alzheimer's Australia Consumer Dementia Research Network as well as members of the public and from participant feedback after the previous trial. The physical activity program has also been modified for a younger age-group to 18 years and older as previous programs targeted middle aged and older adults. The Actigraph device was introduced to measure the objective amount and intensity of physical activity. This revised program (Body Brain Life – Fit) was piloted with the general public (Trial ID: ACTRN12615000822583; manuscript in preparation).

Participants in the BBL-GP group are required to complete 8 modules (dementia literacy, risk factors, physical activity, nutrition, health, cognitive activity, social activity and



1  
2  
3 mood) delivered online. Prior to commencing online modules, participants in the BBL-GP  
4 group also receive an individually tailored plan/program for both dietary and physical activity  
5 interventions developed and delivered by a dietitian and an exercise physiologist, respectively  
6 during a face-to-face assessment. This is to ensure the dietary prescription and level of  
7 physical activity are suitable and tailored to individual participants.  
8  
9  
10  
11  
12

### 13 *Physical activity session*

14  
15 The session duration and frequency of the physical activity (PA) program varies between  
16 participants based on baseline physical activity levels and individual tailoring. An exercise  
17 physiologist designs an individual program for the participant, delivers this in a face-to-face  
18 workshop and monitors the physical activity program via the returned diaries and telephone  
19 monitoring. For those not doing any regular PA at baseline, the target is 150 minutes/week  
20 moderate intensity PA, with moderate intensity defined as a score of 10-12 on the Borg  
21 Rating of Perceived Exertion scale (RPE) (48). For those who are doing regular PA but for  
22 less than 100 minutes/week, an additional 100 minutes/week is prescribed, and for those  
23 meeting the target, an additional 50 minutes/week is prescribed. Printed material guiding  
24 participants to increase their activity level with worksheets are also provided. A diary in the  
25 format of a calendar returned monthly for 24 weeks is used to record PA and RPE to assess  
26 PA and intensity adherence. Participants may develop a medical problem or undergo  
27 treatment that can make exercising difficult or impossible. If this happens, prescribed amount  
28 of exercise is reviewed and re-prescribed, or stopped.  
29  
30  
31  
32  
33  
34  
35  
36  
37  
38  
39  
40  
41  
42  
43  
44  
45

### 46 *Dietary session*

47  
48 Participants at baseline who had unintentional weight loss of 5 kg or weight gain of 5 kg over  
49 the previous six months were seen by the dietitian. Furthermore, participants whose diets at  
50 baseline scored low on one or more of the subscales of the (ARFS) (vegetables <14, fruit <8,  
51 protein <4, grains <9, dairy <8, water <1) (40), were also seen by the dietitian. Dietary  
52  
53  
54  
55  
56  
57  
58  
59  
60

1  
2  
3 counselling was provided by a trained dietitian and overseen by the coordinating dietitian.  
4  
5 During the one hour face-to-face counselling session, participants received individually  
6  
7 tailored dietary advice and printed material explaining the diet in detail.  
8

### 9 *Follow ups*

10  
11 Participants in the BBL-GP group are monitored through phone calls at week 4, 12 (14 for  
12  
13 PA) and week 20 by the dietitian and exercise physiologist to monitor the progress and for  
14  
15 reassurance. In addition, they receive a general booster session at 12 months with a phone  
16  
17 call and a mailed-out booklet summarising materials from the online modules. They are being  
18  
19 asked to continue being active and follow a healthy eating plan after completion of the  
20  
21 intervention.  
22  
23

### 24 *Online modules*

25  
26 Once participants in the BBL-GP group have received face-to-face PA and dietary  
27  
28 counselling sessions, they are asked to log on to the trial website and complete one module  
29  
30 per week, each taking approximately 30-40 minutes. The 12-week program is detailed in  
31  
32 Table 3. The first 8 weeks include the completion of 8 educational and individually tailored  
33  
34 behaviour change modules. In the remaining 4 weeks, participants undertake online activities  
35  
36 focused on goal monitoring and revision of the modules materials. Tailoring of the six  
37  
38 behaviour change modules (weeks 3-8) is conducted using an automated algorithm that  
39  
40 presents content on the basis of whether or not the participant has a relevant risk factor, as  
41  
42 well as on the basis of their responses to several questions measuring psychological  
43  
44 determinants of behaviour. These questions are presented at the beginning of each of the  
45  
46 behaviour change modules. For instance, a person who is classified as having a poor diet (e.g.  
47  
48 lack of fish intake) on the basis of their responses on the ANU-ADRI, and who does not  
49  
50 regard himself/herself as a role model to others with respect to their diet habits is not  
51  
52 presented with information focusing on becoming a role model to others.  
53  
54  
55  
56  
57  
58  
59  
60

1  
2  
3 The program is built in such a way that participants are only able to access the  
4 relevant component of the intervention at a given time. The modules become active, 1 per  
5 week, on the same day for the first 8 weeks. Participants are unable to access a newly  
6 activated module before completing the previously scheduled module. Each week,  
7 participants receive a notification email on the same day of the week alerting them when a  
8 new module has become active and a list of already activated modules that they have either  
9 not started or completed. Participants who are late completing modules will be followed up  
10 with an email from the project manager to identify if there is a reason (e.g. holidays, illness,  
11 work commitments) preventing their participation, and encouraging them to continue with the  
12 study. Compliance is recorded for each module if they are completed on time, delayed or not  
13 completed.

14  
15  
16  
17  
18  
19  
20  
21  
22  
23  
24  
25  
26  
27 *Group 2: Lifestyle Modification Program (LMP)*

28  
29 The lifestyle modification program (LMP), developed by NHC, is designed to provide  
30 individuals with tools to help manage chronic disease and maintain a healthy lifestyle. LMP  
31 is a six- week group program provided by various health professionals (dietitian, exercise  
32 physiologist, nurse practitioner, psychologist, pharmacist, and sleep physician) providing  
33 information on basic nutrition, meal planning, physical activity, health conditions, motivation  
34 and goals, medications, and sleep. Every week, 2 sessions are provided on the same day with  
35 each session lasting an hour. The course is currently run by the NHC for their patients to  
36 assist them in improving their lifestyle and management of chronic disease so it is a  
37 pragmatic real-life comparison condition. Attendance is recorded for compliance and  
38 motivation checking. Although the LMP is a free nationally recognised program that is  
39 designed to provide individuals with tools to help manage chronic disease and maintain a  
40 healthy lifestyle, evaluation of the program has not been carried out as yet. The attendance is  
41 recorded each week to examine intervention fidelity.

### *Group 3: Active control/Email only*

The active control group or email only group proceed with their normal activities and access health services as required over the trial period. Participants in this group also receive weekly emails containing links to various websites providing information on lifestyle risk factors and disease management for a duration of 12 weeks. The weekly emails contain several links, and participants are encouraged to spend approximately an hour each week browsing through the material. The material is generally organised around the same themes as the ones included in the BBL-GP program. An effort has been made to include links to relevant information and educational material, but that otherwise does not include the use of identifiable behaviour-change techniques which are the ‘active ingredient’ of the BBL-GP program. In addition, other than providing participants with the weekly emails, no further contact is made with the participants in this group, such as reminders and prompts that are provided to the BBL-GP group. Participants in this group receive a face to face, 1 hour risk reduction workshop that provides the information contained in the BBL-GP intervention as a mean of debriefing at the end of the intervention.

### *Masking*

To prevent performance bias, research staff conducting the assessments remain masked to participants’ group allocation. The contact person for participants’ website queries, access issues, and technical difficulties is independent of all baseline assessment data. All participants are informed that they are being randomly allocated to one of three study groups and that one group may be more effective than others. They are also notified at the start of the study that one of these groups involves face-to-face group sessions which require them to travel to NHC head office. Hence, the research team members who recruit participants, conduct individual diet and physical activity sessions, and professionals who are involved in the LMP are naturally able to tell which group they have been allocated to. Nurses who

1  
2  
3 conduct baseline and follow-up assessments are however masked to group allocation.

4  
5 *Data management and monitoring*

6  
7 A trial management committee is formed by the research team members (chief and co-  
8 investigators). Nursing staffs from NHC and research assistants collect, clean and send the  
9 study data to the committee on a weekly basis. Most data are automatically entered into excel  
10 files and other data are double-entered to SPSS files to prevent data entry errors. Data  
11 management is then handled independently from the researchers who interpret the data. All  
12 data are stored electronically and in an independent spreadsheet and SPSS data file, which is  
13 only accessible by the researchers involved in this study.  
14  
15  
16  
17  
18  
19  
20  
21

22 An independent Data Monitoring Committee (DMC) is established independently  
23 from the research team who are involved with collecting and managing data. The DMC  
24 provides an independent oversight of the trial and reviews general conduct of the trial and  
25 study data for participant safety. The DMC is comprised of independent, multidisciplinary  
26 experts in dementia research who makes recommendations regarding the continuation,  
27 modification or termination of the trial.  
28  
29  
30  
31  
32  
33  
34

35 Adverse events (minor and serious) are monitored throughout the trial by the  
36 research team and any adverse events would be reported to the trial DMC. For this trial,  
37 an adverse event is defined as an unwanted and usually harmful outcome (e.g. physical  
38 injuries). The event may or may not be related to the intervention, but it occurs while  
39 the person is participating in the intervention, that is, while they are undertaking  
40 physical activities individually prescribed by the exercise physiologist.  
41  
42  
43  
44  
45  
46  
47

48 There are no formal interim analyses planned, as it is not expected that adverse events  
49 would be differentially related to the interventions.  
50  
51

52 *Statistical analyses*

53  
54 Statistical analyses will be based on an intention-to-treat approach. As applied in the previous  
55  
56  
57  
58  
59  
60

1  
2  
3 BBL project (15), multiple imputation and mixed models will be applied to analyse data. We  
4  
5 hypothesise that the effectiveness of the intervention programs will be in the following order:  
6  
7 BBL-GP > LMP > active control. The hypothesis that BBL-GP will be more effective than  
8  
9 LMP is based on research showing that a tailored program is better than a one size fits all  
10  
11 group program in most cases (49). This is also based on the previous BBL project where  
12  
13 those in BBL groups improved more than those in the control group. We will also adjust for  
14  
15 compliance in completing the online modules and following recommendations provided by  
16  
17 the dietitian and exercise physiologist (for BBL-GP group), or for attendance to weekly group  
18  
19 sessions (for LMP group).  
20  
21

### 22 *Ethics and trial registration*

23  
24 The Human Research Ethics Committee at the Australian National University has approved  
25  
26 the study protocols and procedures (protocol #2016/157). This project has also been  
27  
28 registered at the Australian New Zealand Clinical Trials Registry (ACTRN:  
29  
30 12616000868482).  
31  
32

### 33 *Adverse events*

34  
35 This study evaluates lifestyle intervention programs to reduce risk factors for AD. The target  
36  
37 population is adults in a primary care setting who have some of the known risk factors for  
38  
39 dementia, but are at the time of the intervention, healthy and free of any dementia-related  
40  
41 symptoms. We do not anticipate that participants are placed at a greater risk than that  
42  
43 associated with self-driven educational activities over the Internet. An adverse event where a  
44  
45 participant can get hurt during prescribed exercise can occur. To prevent this, we screen  
46  
47 participants using APSS at the baseline assessment to identify individuals with acute/high  
48  
49 risk conditions for exercise. In addition, the exercise physiologist individually tailors  
50  
51 prescribed exercise to minimise risk of injury. Medical assessments are done by the  
52  
53 participants' usual nurses and doctors and if any abnormality is detected in their results, they  
54  
55  
56  
57  
58  
59  
60

1  
2  
3 are required to discuss these abnormalities with participants as usual. To address issues of  
4 potential fatigue, the assessments have been kept to a minimum length. In addition, all online  
5 and face-to-face sessions are designed in an interactive way and are limited to 1-hour sessions  
6 (LMP has 2 themed sessions per week and has a break between sessions). As mentioned  
7 above, all online modules are delivered in an individually tailored fashion to maximise  
8 relevance for each individual.  
9

### 10 *Dissemination plan*

11 Positive, neutral and negative results of the trial will be submitted to international peer-  
12 reviewed journals. In addition, results will be presented at national and international  
13 conferences relevant to the subject matters. Authorship will be allocated using the guidelines  
14 for authorship defined by the International Committees of Medical Journal Editors and  
15 depends on personal involvement.  
16

### 17 **Discussion**

18 The project is currently under way as an evaluation of the efficacy of health promotion  
19 interventions in adults with risk factors for dementia. The program aims to reduce  
20 cardiometabolic risk and promote behaviours shown to protect against dementia. The trial,  
21 recruiting from a primary care setting has generated considerable interest, and to date,  
22 approximately half of the total target sample has been assessed and randomised into the  
23 intervention groups. We anticipate that all data collection will be completed by December  
24 2018. The results of the study are likely to form an evidence base for the feasibility of  
25 dementia risk reduction campaigns to lead to lifestyle changes and the reduction of dementia  
26 risk factors at the population level. This trial will also support the feasibility of such  
27 interventions being applied in primary care settings. Successful outcomes of the current trial  
28 may lead to significant public health impact and benefits once the intervention is made  
29 available at the population level pending positive results.  
30  
31  
32  
33  
34  
35  
36  
37  
38  
39  
40  
41  
42  
43  
44  
45  
46  
47  
48  
49  
50  
51  
52  
53  
54  
55  
56  
57  
58  
59  
60

## Conclusion

Interventions to reduce risk of developing dementia are needed as a cure is not available. This project compares three different approaches to promote healthy lifestyles and to reduce risk of developing dementia applied in a primary care setting. This unique trial demonstrates real life application of dementia risk reduction intervention rather than more controlled but less ecologically valid interventions typically tested in a research setting.

For peer review only



## References

1. Barnes D, Yaffe K. The projected effect of risk factor reduction on Alzheimer's disease prevalence. *The Lancet Neurology*. 2011;10(9):819-28.
2. Ashby-Mitchell K, Burns R, Shaw J, Anstey KJ. Proportion of dementia in Australia explained by common modifiable risk factors. *Alzheimers Res Ther*. 2017;9(1):11.
3. Ngandu T, Lehtisalo J, Solomon A, Levälähti E, Ahtiluoto S, Antikainen R, et al. A 2 year multidomain intervention of diet, exercise, cognitive training, and vascular risk monitoring versus control to prevent cognitive decline in at-risk elderly people (FINGER): a randomised controlled trial. *The Lancet*. 2015;385(9984):2255-63.
4. Prince M, Albanese E, Guerchet M, Prina M. *World Alzheimer Report 2014: Dementia and Risk Reduction. An analysis of protective and modifiable factors*. London: ADI; 2014.
5. Santos CY, Snyder PJ, Wu W-C, Zhang M, Echeverria A, Alber J. Pathophysiologic relationship between Alzheimer's disease, cerebrovascular disease, and cardiovascular risk: A review and synthesis. *Alzheimer's & dementia: Diagnosis, Assessment & Disease Monitoring*. 2017;7:69-87.
6. Blondell SJ, Hammersley-Mather R, Veerman JL. Does physical activity prevent cognitive decline and dementia?: A systematic review and meta-analysis of longitudinal studies. *BMC Public Health*. 2014;14:510.
7. Northey JM, Cherbuin N, Pumpa KL, Smee DJ, Rattray B. Exercise interventions for cognitive function in adults older than 50: a systematic review with meta-analysis. *British Journal of Sports and Medicine*. 2017.
8. Mammen G, Faulkner G. Physical activity and the prevention of depression: a systematic review of prospective studies. *Am J Prev Med*. 2013;45(5):649-57.

- 1  
2  
3 9. Brouwer BG, van der Graaf Y, Soedamah-Muthu SS, Wassink AM, Visseren FL.  
4  
5 Leisure-time physical activity and risk of type 2 diabetes in patients with established vascular  
6  
7 disease or poorly controlled vascular risk factors. *Diabetes research and clinical practice*.  
8  
9 2010;87(3):372-8.  
10
- 11 10. Middleton KR, Anton SD, Perri MG. Long-term Adherence to Health Behavior  
12  
13 Change. *American Journal of Lifestyle Medicine*. 2013;7(6):395-404.  
14
- 15 11. Locke EA. Motivation through conscious goal setting. *Applied and Preventive*  
16  
17 *Psychology*. 1996;5(2):117-24.  
18
- 19 12. The Department of Health. National primary health care strategic framework: Primary  
20  
21 health care in Australia 2013 [Available from:  
22  
23 [http://www.health.gov.au/internet/publications/publishing.nsf/Content/NPHC-Strategic-](http://www.health.gov.au/internet/publications/publishing.nsf/Content/NPHC-Strategic-Framework~phc-australia)  
24  
25 [Framework~phc-australia](http://www.health.gov.au/internet/publications/publishing.nsf/Content/NPHC-Strategic-Framework~phc-australia).  
26  
27
- 28 13. Robinson L, Tang E, Taylor J-P. Dementia: timely diagnosis and early intervention.  
29  
30 *BMJ : British Medical Journal*. 2015;350.  
31  
32
- 33 14. van Charante EPM, Richard E, Eurelings LS, van Dalen J-W, Ligthart SA, van Bussel  
34  
35 EF, et al. Effectiveness of a 6-year multidomain vascular care intervention to prevent  
36  
37 dementia (preDIVA): a cluster-randomised controlled trial. *The Lancet*.  
38  
39 2016;388(10046):797-805.  
40
- 41 15. Anstey KJ, Bahar-Fuchs A, Herath P, Kim S, Burns R, Rebok GW, et al. Body brain  
42  
43 life: A randomized controlled trial of an online dementia risk reduction intervention in  
44  
45 middle-aged adults at risk of Alzheimer's disease. *Alzheimer's & Dementia: Translational*  
46  
47 *Research & Clinical Interventions*. 2015;1(1):72-80.  
48  
49
- 50 16. Boutron I, Moher D, Altman DG, Schulz KF, Ravaud P, for the CG. Extending the  
51  
52 consort statement to randomized trials of nonpharmacologic treatment: Explanation and  
53  
54 elaboration. *Ann Intern Med*. 2008;148(4):295-309.  
55  
56  
57  
58  
59  
60

- 1  
2  
3 17. Zwarenstein M, Treweek S, Gagnier JJ, Altman DG, Tunis S, Haynes B, et al.  
4  
5 Improving the reporting of pragmatic trials: an extension of the CONSORT statement. *BMJ*.  
6  
7 2008;337.
- 8  
9 18. Chan A, Tetzlaff JM, Altman DG, et al. Spirit 2013 statement: Defining standard  
10  
11 protocol items for clinical trials. *Ann Intern Med*. 2013;158(3):200-7.
- 12  
13 19. Anstey KJ, Cherbuin N, Herath P. Development of a new method for assessing global  
14  
15 risk of Alzheimer's disease for use in population health approaches to prevention. *Prev Sci*.  
16  
17 2013;14:411-21.
- 18  
19 20. Exercise & Sports Science Australia. Adult pre-exercise screening system 2011  
20  
21 [Available from: <https://www.essa.org.au/for-gps/adult-pre-exercise-screening-system/>.  
22  
23
- 24 21. Folstein MF, Folstein SE, McHugh PR. "Mini-mental state". A practical method for  
25  
26 grading the cognitive state of patients for the clinician. *J Psychiatr Res*. 1975;12(3):189-98.
- 27  
28 22. Snell WE, Jr., Johnson G. The Multidimensional Health Questionnaire. *American*  
29  
30 *Journal of Health Behavior*. 1997;21:33-42.
- 31  
32 23. Kim S, Cherbuin N, Anstey KJ. Assessing reliability of short and tick box forms of  
33  
34 the ANU-ADRI: Convenient alternatives of a self-report Alzheimer's disease risk assessment.  
35  
36 *Alzheimer's & Dementia: Translational Research & Clinical Interventions*. 2016;2(2):93-8.
- 37  
38 24. Anstey KJ, Cherbuin N, Herath P, Qiu C, Kuller LH, Lopez OL, et al. A self-report  
39  
40 risk index to predict occurrence of dementia in three independent cohorts of older adults: the  
41  
42 ANU-ADRI. *PLoS ONE*. 2014;9(1):e86141.
- 43  
44 25. Colcombe S, Kramer AF. Fitness effects on the cognitive function of older adults: a  
45  
46 meta-analytic study. *Psychol Sci*. 2003;14(2):125-30.
- 47  
48 26. Anstey KJ, Sargent-Cox K, Garde E, Cherbuin N, Butterworth P. Cognitive  
49  
50 development over 8 years in midlife and its association with cardiovascular risk factors.  
51  
52 *Neuropsychology*. 2014;28(4):653-65.
- 53  
54  
55  
56  
57  
58  
59  
60

- 1  
2  
3 27. Spreen O, Strauss E. A compendium of neuropsychological tests: administration,  
4 norms and commentary. New York: Oxford University Press; 1991.  
5  
6  
7 28. Arbuthnott K, Frank J. Trail Making Test, Part B as a Measure of Executive Control:  
8 Validation Using a Set-Switching Paradigm. *J Clin Exp Neuropsychol*. 2000;22(4):518-28.  
9  
10  
11 29. Giovagnoli AR, Del Pesce M, Mascheroni S, Simoncelli M, Laiacona M, Capitani E.  
12 Trail making test: normative values from 287 normal adult controls. *The Italian Journal of*  
13 *Neurological Sciences*. 1996;17(4):305-9.  
14  
15  
16 30. Smith A. Symbol digit modalities test: Manual. . Los Angeles: Western Psychological  
17 Services; 1982.  
18  
19  
20 31. Craig CL, Marshall AL, Sjoström M, Bauman AE, Booth ML, Ainsworth BE, et al.  
21 International physical activity questionnaire: 12-country reliability and validity. *Med Sci*  
22 *Sports Exerc*. 2003;35(8):1381-95.  
23  
24  
25 32. Radloff L. The CES-D scale: A self report depression scale for research in the general  
26 population. *Applied Psychological Measurement*. 1977;1:385-401.  
27  
28  
29 33. Radloff LS. The CES-D Scale:A Self-Report Depression Scale for Research in the  
30 General Population. *Applied Psychological Measurement*. 1977;1(3):385-401.  
31  
32  
33 34. Ware J, Jr., Kosinski M, Keller SD. A 12-Item Short-Form Health Survey:  
34 construction of scales and preliminary tests of reliability and validity. *Medical care*.  
35 1996;34(3):220-33.  
36  
37  
38 35. Wilson PWF, D'Agostino RB, Levy D, Belanger AM, Silbershatz H, Kannel WB.  
39 Prediction of Coronary Heart Disease Using Risk Factor Categories. *Circulation*.  
40 1998;97(18):1837-47.  
41  
42  
43 36. Chen L, Magliano DJ, Balkau B, Colagiuri S, Zimmet PZ, Tonkin AM, et al.  
44 AUSDRISK: an Australian Type 2 Diabetes Risk Assessment Tool based on demographic,  
45  
46  
47  
48  
49  
50  
51  
52  
53  
54  
55  
56  
57  
58  
59  
60

1  
2  
3 lifestyle and simple anthropometric measures. The Medical journal of Australia.

4  
5 2010;192:197-202.

6  
7 37. Jakobsson U. Using the 12-item Short Form health survey (SF-12) to measure quality  
8  
9 of life among older people. Aging clinical and experimental research. 2007;19(6):457-64.

10  
11 38. Maruish ME. User's Manual for the SF-12v2 Health Survey (3rd ed.). Lincoln, RI:  
12  
13 Quality Metric Incorporated; 2012.

14  
15 39. Framingham Heart Study. [https://www.framinghamheartstudy.org/risk-](https://www.framinghamheartstudy.org/risk-functions/coronary-heart-disease/10-year-risk.php)  
16  
17 [functions/coronary-heart-disease/10-year-risk.php](https://www.framinghamheartstudy.org/risk-functions/coronary-heart-disease/10-year-risk.php) 2017 [Available from:  
18  
19 [https://www.framinghamheartstudy.org/risk-](https://www.framinghamheartstudy.org/risk-functions/coronary-heart-disease/10-year-risk.php)  
20  
21 [risk.php](https://www.framinghamheartstudy.org/risk-functions/coronary-heart-disease/10-year-</a><br/>22<br/>23 <a href=).

24  
25 40. Collins CE, Burrows TL, Rollo ME, Boggess MM, Watson JF, Guest M, et al. The  
26  
27 comparative validity and reproducibility of a diet quality index for adults: the Australian  
28  
29 Recommended Food Score. Nutrients. 2015;7(2):785-98.

30  
31 41. National Health and Medical Research Council. Australian Dietary Guidelines.  
32  
33 Canberra: National Health and Medical Research Council; 2013.

34  
35 42. National Health and Medical Research Council. Australian Guide to Healthy Eating.  
36  
37 Canberra: National Health and Medical Research Council; 2003.

38  
39 43. Buysse DJ, Reynolds CF, 3rd, Monk TH, Berman SR, Kupfer DJ. The Pittsburgh  
40  
41 Sleep Quality Index: a new instrument for psychiatric practice and research. Psychiatry  
42  
43 research. 1989;28(2):193-213.

44  
45 44. Backhaus J, Junghanns K, Broocks A, Riemann D, Hohagen F. Test-retest reliability  
46  
47 and validity of the Pittsburgh Sleep Quality Index in primary insomnia. J Psychosom Res.  
48  
49 2002;53(3):737-40.

- 1  
2  
3 45. Anstey KJ, Bahar-Fuchs A, Herath P, Rebok GW, Cherbuin N. A 12-week  
4  
5 multidomain intervention versus active control to reduce risk of Alzheimer's disease: study  
6  
7 protocol for a randomized controlled trial. *Trials*. 2013;14:60.  
8  
9 46. Lautenschlager NT, Cox KL, Flicker L, Foster JK, van Bockxmeer FM, Xiao J, et al.  
10  
11 Effect of physical activity on cognitive function in older adults at risk for Alzheimer disease:  
12  
13 a randomized trial. *JAMA*. 2008;300:1027-37.  
14  
15 47. Cyarto EV, Cox KL, Almeida OP, Flicker L, Ames D, Byrne G, et al. The fitness for  
16  
17 the Ageing Brain Study II (FABS II): protocol for a randomized controlled clinical trial  
18  
19 evaluating the effect of physical activity on cognitive function in patients with Alzheimer's  
20  
21 disease. *Trials*. 2010;11:120.  
22  
23 48. Borg GA. Psychophysical bases of perceived exertion. *Med Sci Sports Exerc*.  
24  
25 1982;14(5):377-81.  
26  
27 49. Kreuter MW, Oswald DL, Bull FC, Clark EM. Are tailored health education materials  
28  
29 always more effective than non-tailored materials? *Health Education Research*.  
30  
31 2000;15(3):305-15.  
32  
33  
34  
35  
36  
37  
38  
39  
40  
41  
42  
43  
44  
45  
46  
47  
48  
49  
50  
51  
52  
53  
54  
55  
56  
57  
58  
59  
60

### **Authors' contributions**

KJA conceived the study and built relationship with NHC. KJA, NC, SK developed the overall design of the intervention. NL and KC designed the implementation of the physical activity related intervention. CD and KJA designed the statistical analysis plan for the protocol. DP and GR contributed knowledge of primary care setting and advised on implementing the intervention in a GP clinic. ST designed the implementation of the dietary intervention. NC and SK managed the implementation of the online component in the dedicated web portal. SK, MM, ST, KC, NL, GR, DP, IM, NC and KJA wrote the study protocol and critically reviewed the manuscript.

### **Funding statement**

This work was supported by National Health and Medical Research Council (NHMRC) Centre of Research Excellence in Cognitive Health and development of original BBL modules was funded by the NHMRC Dementia Collaborative Research Centres. KJA is funded by NHMRC Fellowship APP1102694.

This funding source had no role in the design of this study and will not have any role during its execution, analyses, interpretation of the data, or decision to submit results.

### **Acknowledgements**

The investigators acknowledge the work of staff at the National Health Co-op and research staff at the Centre for Research on Ageing, Health and Wellbeing. The investigators would particularly like to acknowledge the valued contribution of the trial participants.

### **Competing interests**

None declared.

Table 1. Assessment measures at the baseline and follow up evaluations

| Assessment measure | Baseline | Immediate follow up<br>(Week 7 for LMP and<br>week 13 for BBL-GP<br>and active control<br>group) | Week 18 | Week 36 | Week 62 |
|--------------------|----------|--------------------------------------------------------------------------------------------------|---------|---------|---------|
| Screening          |          |                                                                                                  |         |         |         |
| APSS               | √        |                                                                                                  |         |         |         |
| MMSE (if 60+)      | √        |                                                                                                  |         |         |         |
| Questionnaires     |          |                                                                                                  |         |         |         |
| ANU-ADRI           | √        | √                                                                                                | √       | √       | √       |
| PSQI               | √        | √                                                                                                | √       | √       | √       |
| ARFS               | √        | √                                                                                                | √       | √       | √       |
| SF-12              | √        | √                                                                                                | √       | √       | √       |
| MHQ                | √        |                                                                                                  |         |         |         |



1  
2  
3  
4  
5  
6  
7  
8  
9  
10  
11  
12  
13  
14  
15  
16  
17  
18  
19  
20  
21  
22  
23  
24  
25  
26  
27  
28  
29  
30  
31  
32  
33  
34  
35  
36  
37  
38  
39  
40  
41  
42  
43  
44  
45  
46  
47

|                                                            |   |  |   |   |   |
|------------------------------------------------------------|---|--|---|---|---|
| Cognitive measures                                         |   |  |   |   |   |
| Trails A + B                                               | √ |  | √ | √ | √ |
| DSMT                                                       | √ |  | √ | √ | √ |
| Physical and medical evaluation<br>(by doctors and nurses) |   |  |   |   |   |
| MVPA                                                       | √ |  | √ | √ | √ |
| Blood pressure                                             | √ |  | √ | √ | √ |
| Height, cm                                                 | √ |  |   |   |   |
| Weight, kg                                                 | √ |  | √ | √ | √ |
| Waist and hip, cm                                          | √ |  | √ | √ | √ |
| Body Composition                                           | √ |  | √ | √ | √ |
| Framingham CHD                                             | √ |  | √ | √ | √ |
| AUSDRISK                                                   | √ |  | √ | √ | √ |

Note: APSS: Adults Pre-exercise Screening System; MMSE: Mini-Mental State Examination; ANU-ADRI: Australian National University – Alzheimer’s Disease Risk Index; PSQI: Pittsburgh Sleep Quality Index; ARFS: Australian Recommended Food Score; SF-12: SF-12 Health

1  
2  
3  
4  
5 Survey;; MHQ: Multidimensional Health Questionnaire; DSMT: Digit Symbol Modalities Test; MVPA: Moderate-vigorous Physical Activity;  
6  
7 Framingham CHD: Framingham Coronary Heart Disease Risk score; AUSDRISK: Australian type 2 diabetes risk assessment tool.  
8  
9  
10  
11  
12  
13  
14  
15  
16  
17  
18  
19  
20  
21  
22  
23  
24  
25  
26  
27  
28  
29  
30  
31  
32  
33  
34  
35  
36  
37  
38  
39  
40  
41  
42  
43  
44  
45  
46  
47

For peer review only

1  
2  
3  
4  
5  
6  
7  
8  
9  
10  
11  
12  
13  
14  
15  
16  
17  
18  
19  
20  
21  
22  
23  
24  
25  
26  
27  
28  
29  
30  
31  
32  
33  
34  
35  
36  
37  
38  
39  
40  
41  
42  
43  
44  
45  
46  
47

Table 2: Comparison of intervention programs

|                     | LMP                                                        | BBL-GP                                                                                                                | Active control                                                                                                                                             |
|---------------------|------------------------------------------------------------|-----------------------------------------------------------------------------------------------------------------------|------------------------------------------------------------------------------------------------------------------------------------------------------------|
| Previously applied: | Yes, in primary care. Evaluation has not been carried out. | Yes, with member of general public with concern about developing dementia. Never been tested in primary care setting. | Yes, with member of general public with concern about developing dementia.                                                                                 |
| Duration            | 6 weeks                                                    | 12 weeks                                                                                                              | 12 weeks                                                                                                                                                   |
| Frequency           | Weekly                                                     | Weekly                                                                                                                | Weekly                                                                                                                                                     |
| Number of sessions  | 12 sessions (2 sessions per week)                          | 8 online sessions, 1 session with dietitian, 1 session with exercise physiologist                                     | 12 emails containing links to various websites providing information on lifestyle risk factors and disease management                                      |
| Format              | Face to face group sessions                                | 1 hour individual session with dietitian, 1 hour individual session with exercise physiologist, 8 online modules      | Weekly emails containing health information such as health status of Australians, physical activity and nutrition, alcohol and tobacco, and mental health. |

Table 3: Description of the 12-week online program delivered through the Body Brain Life – GP (BBL-GP) website

| Week | Activity                                   | Description                                                                                                                                                                                                                                                                                                                                                                                                                                                                                                                                                                                                                       |
|------|--------------------------------------------|-----------------------------------------------------------------------------------------------------------------------------------------------------------------------------------------------------------------------------------------------------------------------------------------------------------------------------------------------------------------------------------------------------------------------------------------------------------------------------------------------------------------------------------------------------------------------------------------------------------------------------------|
| 1    | Module 1: Dementia literacy                | The first module focuses on providing participants with general information about dementia including types, causes, prevalence, social and economic impact, symptoms, brain function, treatment, risk factors (modifiable and non-modifiable), and prevention. This module serves as an introduction to the subsequent modules.                                                                                                                                                                                                                                                                                                   |
| 2    | Module 2: Dementia risk factors            | This module is aimed at building awareness and knowledge of the various health conditions associated with an increased risk of Alzheimer's dementia (AD). Specifically, this module provides details regarding the association between AD and several medical conditions (abnormal weight, high cholesterol, diabetes, hypertension, and depression), as well as lifestyle factors (alcohol use and smoking, physical activity, nutrition, stroke and head injury, mental health, social and cognitive engagement). The module also briefly covers non-modifiable risk factors that contribute to AD, including age and genetics. |
| 3    | Module 3: BBL FIT - physical activity      | This is a theory-driven, individually-tailored module that aims to help participants incorporate regular physical activity into their daily routine and reduce sedentary behaviour by focusing on increasing endurance, strength, balance, and flexibility. This module targets several barriers to engaging in physical activity, such as increasing motivation, creating opportunities to exercise, and developing a social network that supports physical activity goals.                                                                                                                                                      |
| 4    | Module 4: BBL nutrition                    | This is a theory-driven, individually-tailored module aimed at helping people develop healthy dietary habits. This module targets the risk associated with abnormal weight, and the protective effects associated with fish intake and other dietary components.                                                                                                                                                                                                                                                                                                                                                                  |
| 5    | Module 5: BBL health self-management       | This is a theory-driven, individually-tailored module aimed at increasing participants' health monitoring and management of chronic health conditions. Because several chronic health conditions such as hypertension, diabetes and high cholesterol, are associated with increased risk for dementia, prevention and appropriate management of such conditions is also likely to be protective against dementia.                                                                                                                                                                                                                 |
| 6    | Module 6: BBL Think – cognitive engagement | This is a theory-driven, individually-tailored module aimed at increasing participants' levels of engagement with mentally stimulating activities such as reading, doing crosswords and visiting museums, which is a protective factor against dementia.                                                                                                                                                                                                                                                                                                                                                                          |

1  
2  
3  
4  
5  
6  
7  
8  
9  
10  
11  
12  
13  
14  
15  
16  
17  
18  
19  
20  
21  
22  
23  
24  
25  
26  
27  
28  
29  
30  
31  
32  
33  
34  
35  
36  
37  
38  
39  
40  
41  
42  
43  
44  
45  
46  
47

|   |                                           |                                                                                                                                                                                                                                                                                                                                           |
|---|-------------------------------------------|-------------------------------------------------------------------------------------------------------------------------------------------------------------------------------------------------------------------------------------------------------------------------------------------------------------------------------------------|
| 7 | Module 7: BBL connect – social engagement | This is a theory-driven, individually-tailored module aimed at increasing participants’ levels of social engagement. The module targets the risk factor for dementia associated with loneliness and depression, and the protective effects of regular social engagement.                                                                  |
| 8 | Module 8: BBL mood                        | This is a theory-driven, individually-tailored module that aims to help participants monitor and maintain good mental health. The module targets risk factors for dementia associated with mental health and mood, focusing on depression and anxiety. Information is provided on symptoms, types, treatment, and tips for managing mood. |
| 9 | 9 to 12 Self-guided online activities     | During these sessions, participants are encouraged to engage in a range of online activities for 1 h, including accessing the many tools they have accumulated during the first 7 weeks. Examples include the goal-setting tool, behaviour-monitoring tool, unhelpful thoughts monitoring tool, videos, and so on.                        |

For peer review only

1  
2  
3 Figure 1. Study Flowchart  
4  
5  
6  
7  
8  
9  
10  
11  
12  
13  
14  
15  
16  
17  
18  
19  
20  
21  
22  
23  
24  
25  
26  
27  
28  
29  
30  
31  
32  
33  
34  
35  
36  
37  
38  
39  
40  
41  
42  
43  
44  
45  
46  
47  
48  
49  
50  
51  
52  
53  
54  
55  
56  
57  
58  
59  
60

For peer review only



Figure 1: Study Flowchart

225x300mm (300 x 300 DPI)



SPIRIT 2013 Checklist: Recommended items to address in a clinical trial protocol and related documents\*

| Section/item                      | Item No | Description                                                                                                                                                                                                                                                                              | Addressed on page number |
|-----------------------------------|---------|------------------------------------------------------------------------------------------------------------------------------------------------------------------------------------------------------------------------------------------------------------------------------------------|--------------------------|
| <b>Administrative information</b> |         |                                                                                                                                                                                                                                                                                          |                          |
| Title                             | 1       | Descriptive title identifying the study design, population, interventions, and, if applicable, trial acronym                                                                                                                                                                             | ___1___                  |
| Trial registration                | 2a      | Trial identifier and registry name. If not yet registered, name of intended registry                                                                                                                                                                                                     | ___4, 18___              |
|                                   | 2b      | All items from the World Health Organization Trial Registration Data Set                                                                                                                                                                                                                 | ___N/A___                |
| Protocol version                  | 3       | Date and version identifier                                                                                                                                                                                                                                                              | ___2___                  |
| Funding                           | 4       | Sources and types of financial, material, and other support                                                                                                                                                                                                                              | ___26___                 |
| Roles and responsibilities        | 5a      | Names, affiliations, and roles of protocol contributors                                                                                                                                                                                                                                  | ___1, 26___              |
|                                   | 5b      | Name and contact information for the trial sponsor                                                                                                                                                                                                                                       | ___N/A___                |
|                                   | 5c      | Role of study sponsor and funders, if any, in study design; collection, management, analysis, and interpretation of data; writing of the report; and the decision to submit the report for publication, including whether they will have ultimate authority over any of these activities | ___29___                 |
|                                   | 5d      | Composition, roles, and responsibilities of the coordinating centre, steering committee, endpoint adjudication committee, data management team, and other individuals or groups overseeing the trial, if applicable (see Item 21a for data monitoring committee)                         | ___N/A___                |



1  
2  
3  
4  
5  
6  
7  
8  
9  
10  
11  
12  
13  
14  
15  
16  
17  
18  
19  
20  
21  
22  
23  
24  
25  
26  
27  
28  
29  
30  
31  
32  
33  
34  
35  
36  
37  
38  
39  
40  
41  
42  
43  
44  
45  
46  
47**Introduction**

|                          |    |                                                                                                                                                                                                           |             |
|--------------------------|----|-----------------------------------------------------------------------------------------------------------------------------------------------------------------------------------------------------------|-------------|
| Background and rationale | 6a | Description of research question and justification for undertaking the trial, including summary of relevant studies (published and unpublished) examining benefits and harms for each intervention        | ___ 5-8 ___ |
|                          | 6b | Explanation for choice of comparators                                                                                                                                                                     | ___ 7-8 ___ |
| Objectives               | 7  | Specific objectives or hypotheses                                                                                                                                                                         | ___ 7 ___   |
| Trial design             | 8  | Description of trial design including type of trial (eg, parallel group, crossover, factorial, single group), allocation ratio, and framework (eg, superiority, equivalence, noninferiority, exploratory) | ___ 7 ___   |

**Methods: Participants, interventions, and outcomes**

|                      |     |                                                                                                                                                                                                                                                                                                                                                                                |                   |
|----------------------|-----|--------------------------------------------------------------------------------------------------------------------------------------------------------------------------------------------------------------------------------------------------------------------------------------------------------------------------------------------------------------------------------|-------------------|
| Study setting        | 9   | Description of study settings (eg, community clinic, academic hospital) and list of countries where data will be collected. Reference to where list of study sites can be obtained                                                                                                                                                                                             | ___ 8 ___         |
| Eligibility criteria | 10  | Inclusion and exclusion criteria for participants. If applicable, eligibility criteria for study centres and individuals who will perform the interventions (eg, surgeons, psychotherapists)                                                                                                                                                                                   | ___ 9-11 ___      |
| Interventions        | 11a | Interventions for each group with sufficient detail to allow replication, including how and when they will be administered                                                                                                                                                                                                                                                     | ___ 13-17 ___     |
|                      | 11b | Criteria for discontinuing or modifying allocated interventions for a given trial participant (eg, drug dose change in response to harms, participant request, or improving/worsening disease)                                                                                                                                                                                 | ___ 15 ___        |
|                      | 11c | Strategies to improve adherence to intervention protocols, and any procedures for monitoring adherence (eg, drug tablet return, laboratory tests)                                                                                                                                                                                                                              | ___ 14-16 ___     |
|                      | 11d | Relevant concomitant care and interventions that are permitted or prohibited during the trial                                                                                                                                                                                                                                                                                  | ___ 14-17 ___     |
| Outcomes             | 12  | Primary, secondary, and other outcomes, including the specific measurement variable (eg, systolic blood pressure), analysis metric (eg, change from baseline, final value, time to event), method of aggregation (eg, median, proportion), and time point for each outcome. Explanation of the clinical relevance of chosen efficacy and harm outcomes is strongly recommended | ___ 11-13 ___     |
| Participant timeline | 13  | Time schedule of enrolment, interventions (including any run-ins and washouts), assessments, and visits for participants. A schematic diagram is highly recommended (see Figure)                                                                                                                                                                                               | ___ 11, 27-29 ___ |

|   |             |    |                                                                                                                                                                                       |          |
|---|-------------|----|---------------------------------------------------------------------------------------------------------------------------------------------------------------------------------------|----------|
| 1 |             |    |                                                                                                                                                                                       |          |
| 2 |             |    |                                                                                                                                                                                       |          |
| 3 | Sample size | 14 | Estimated number of participants needed to achieve study objectives and how it was determined, including clinical and statistical assumptions supporting any sample size calculations | ___10___ |
| 4 |             |    |                                                                                                                                                                                       |          |
| 5 | Recruitment | 15 | Strategies for achieving adequate participant enrolment to reach target sample size                                                                                                   | ___9___  |
| 6 |             |    |                                                                                                                                                                                       |          |
| 7 |             |    |                                                                                                                                                                                       |          |

### 8 **Methods: Assignment of interventions (for controlled trials)**

#### 9 Allocation:

|    |                                  |     |                                                                                                                                                                                                                                                                                                                                                          |             |
|----|----------------------------------|-----|----------------------------------------------------------------------------------------------------------------------------------------------------------------------------------------------------------------------------------------------------------------------------------------------------------------------------------------------------------|-------------|
| 10 |                                  |     |                                                                                                                                                                                                                                                                                                                                                          |             |
| 11 |                                  |     |                                                                                                                                                                                                                                                                                                                                                          |             |
| 12 | Sequence generation              | 16a | Method of generating the allocation sequence (eg, computer-generated random numbers), and list of any factors for stratification. To reduce predictability of a random sequence, details of any planned restriction (eg, blocking) should be provided in a separate document that is unavailable to those who enrol participants or assign interventions | ___13___    |
| 13 |                                  |     |                                                                                                                                                                                                                                                                                                                                                          |             |
| 14 |                                  |     |                                                                                                                                                                                                                                                                                                                                                          |             |
| 15 |                                  |     |                                                                                                                                                                                                                                                                                                                                                          |             |
| 16 |                                  |     |                                                                                                                                                                                                                                                                                                                                                          |             |
| 17 | Allocation concealment mechanism | 16b | Mechanism of implementing the allocation sequence (eg, central telephone; sequentially numbered, opaque, sealed envelopes), describing any steps to conceal the sequence until interventions are assigned                                                                                                                                                | ___13___    |
| 18 |                                  |     |                                                                                                                                                                                                                                                                                                                                                          |             |
| 19 |                                  |     |                                                                                                                                                                                                                                                                                                                                                          |             |
| 20 |                                  |     |                                                                                                                                                                                                                                                                                                                                                          |             |
| 21 | Implementation                   | 16c | Who will generate the allocation sequence, who will enrol participants, and who will assign participants to interventions                                                                                                                                                                                                                                | ___13___    |
| 22 |                                  |     |                                                                                                                                                                                                                                                                                                                                                          |             |
| 23 |                                  |     |                                                                                                                                                                                                                                                                                                                                                          |             |
| 24 | Blinding (masking)               | 17a | Who will be blinded after assignment to interventions (eg, trial participants, care providers, outcome assessors, data analysts), and how                                                                                                                                                                                                                | ___17-18___ |
| 25 |                                  |     |                                                                                                                                                                                                                                                                                                                                                          |             |
| 26 |                                  |     |                                                                                                                                                                                                                                                                                                                                                          |             |
| 27 |                                  | 17b | If blinded, circumstances under which unblinding is permissible, and procedure for revealing a participant's allocated intervention during the trial                                                                                                                                                                                                     | ___17___    |
| 28 |                                  |     |                                                                                                                                                                                                                                                                                                                                                          |             |
| 29 |                                  |     |                                                                                                                                                                                                                                                                                                                                                          |             |
| 30 |                                  |     |                                                                                                                                                                                                                                                                                                                                                          |             |

### 31 **Methods: Data collection, management, and analysis**

|    |                         |     |                                                                                                                                                                                                                                                                                                                                                                                                              |             |
|----|-------------------------|-----|--------------------------------------------------------------------------------------------------------------------------------------------------------------------------------------------------------------------------------------------------------------------------------------------------------------------------------------------------------------------------------------------------------------|-------------|
| 32 |                         |     |                                                                                                                                                                                                                                                                                                                                                                                                              |             |
| 33 | Data collection methods | 18a | Plans for assessment and collection of outcome, baseline, and other trial data, including any related processes to promote data quality (eg, duplicate measurements, training of assessors) and a description of study instruments (eg, questionnaires, laboratory tests) along with their reliability and validity, if known. Reference to where data collection forms can be found, if not in the protocol | ___11___    |
| 34 |                         |     |                                                                                                                                                                                                                                                                                                                                                                                                              |             |
| 35 |                         |     |                                                                                                                                                                                                                                                                                                                                                                                                              |             |
| 36 |                         |     |                                                                                                                                                                                                                                                                                                                                                                                                              |             |
| 37 |                         |     |                                                                                                                                                                                                                                                                                                                                                                                                              |             |
| 38 |                         | 18b | Plans to promote participant retention and complete follow-up, including list of any outcome data to be collected for participants who discontinue or deviate from intervention protocols                                                                                                                                                                                                                    | ___16-17___ |
| 39 |                         |     |                                                                                                                                                                                                                                                                                                                                                                                                              |             |
| 40 |                         |     |                                                                                                                                                                                                                                                                                                                                                                                                              |             |
| 41 |                         |     |                                                                                                                                                                                                                                                                                                                                                                                                              |             |
| 42 |                         |     |                                                                                                                                                                                                                                                                                                                                                                                                              |             |
| 43 |                         |     |                                                                                                                                                                                                                                                                                                                                                                                                              |             |
| 44 |                         |     |                                                                                                                                                                                                                                                                                                                                                                                                              |             |
| 45 |                         |     |                                                                                                                                                                                                                                                                                                                                                                                                              |             |
| 46 |                         |     |                                                                                                                                                                                                                                                                                                                                                                                                              |             |
| 47 |                         |     |                                                                                                                                                                                                                                                                                                                                                                                                              |             |

1  
2  
3  
4  
5  
6  
7  
8  
9  
10  
11  
12  
13  
14  
15  
16  
17  
18  
19  
20  
21  
22  
23  
24  
25  
26  
27  
28  
29  
30  
31  
32  
33  
34  
35  
36  
37  
38  
39  
40  
41  
42  
43  
44  
45  
46  
47

Data management 19 Plans for data entry, coding, security, and storage, including any related processes to promote data quality (eg, double data entry; range checks for data values). Reference to where details of data management procedures can be found, if not in the protocol \_\_\_\_\_18\_\_\_\_\_

Statistical methods 20a Statistical methods for analysing primary and secondary outcomes. Reference to where other details of the statistical analysis plan can be found, if not in the protocol \_\_\_\_\_18\_\_\_\_\_

20b Methods for any additional analyses (eg, subgroup and adjusted analyses) \_\_\_\_\_18\_\_\_\_\_

20c Definition of analysis population relating to protocol non-adherence (eg, as randomised analysis), and any statistical methods to handle missing data (eg, multiple imputation) \_\_\_\_\_18\_\_\_\_\_

**Methods: Monitoring**

Data monitoring 21a Composition of data monitoring committee (DMC); summary of its role and reporting structure; statement of whether it is independent from the sponsor and competing interests; and reference to where further details about its charter can be found, if not in the protocol. Alternatively, an explanation of why a DMC is not needed \_\_\_\_\_19\_\_\_\_\_

21b Description of any interim analyses and stopping guidelines, including who will have access to these interim results and make the final decision to terminate the trial \_\_\_\_\_19\_\_\_\_\_

Harms 22 Plans for collecting, assessing, reporting, and managing solicited and spontaneously reported adverse events and other unintended effects of trial interventions or trial conduct \_\_\_\_\_18-19\_\_\_\_\_

Auditing 23 Frequency and procedures for auditing trial conduct, if any, and whether the process will be independent from investigators and the sponsor \_\_\_\_\_15-17, 18-19\_\_\_\_\_

**Ethics and dissemination**

Research ethics approval 24 Plans for seeking research ethics committee/institutional review board (REC/IRB) approval \_\_\_\_\_18\_\_\_\_\_

Protocol amendments 25 Plans for communicating important protocol modifications (eg, changes to eligibility criteria, outcomes, analyses) to relevant parties (eg, investigators, REC/IRBs, trial participants, trial registries, journals, regulators) \_\_\_\_\_18\_\_\_\_\_



|    |                               |     |                                                                                                                                                                                                                                                                                     |             |
|----|-------------------------------|-----|-------------------------------------------------------------------------------------------------------------------------------------------------------------------------------------------------------------------------------------------------------------------------------------|-------------|
| 1  |                               |     |                                                                                                                                                                                                                                                                                     |             |
| 2  |                               |     |                                                                                                                                                                                                                                                                                     |             |
| 3  | Consent or assent             | 26a | Who will obtain informed consent or assent from potential trial participants or authorised surrogates, and how (see Item 32)                                                                                                                                                        | ___9___     |
| 4  |                               |     |                                                                                                                                                                                                                                                                                     |             |
| 5  |                               |     |                                                                                                                                                                                                                                                                                     |             |
| 6  |                               | 26b | Additional consent provisions for collection and use of participant data and biological specimens in ancillary studies, if applicable                                                                                                                                               | ___N/A___   |
| 7  |                               |     |                                                                                                                                                                                                                                                                                     |             |
| 8  | Confidentiality               | 27  | How personal information about potential and enrolled participants will be collected, shared, and maintained in order to protect confidentiality before, during, and after the trial                                                                                                | ___9, 18___ |
| 9  |                               |     |                                                                                                                                                                                                                                                                                     |             |
| 10 |                               |     |                                                                                                                                                                                                                                                                                     |             |
| 11 | Declaration of interests      | 28  | Financial and other competing interests for principal investigators for the overall trial and each study site                                                                                                                                                                       | ___26___    |
| 12 |                               |     |                                                                                                                                                                                                                                                                                     |             |
| 13 |                               |     |                                                                                                                                                                                                                                                                                     |             |
| 14 | Access to data                | 29  | Statement of who will have access to the final trial dataset, and disclosure of contractual agreements that limit such access for investigators                                                                                                                                     | ___18___    |
| 15 |                               |     |                                                                                                                                                                                                                                                                                     |             |
| 16 |                               |     |                                                                                                                                                                                                                                                                                     |             |
| 17 | Ancillary and post-trial care | 30  | Provisions, if any, for ancillary and post-trial care, and for compensation to those who suffer harm from trial participation                                                                                                                                                       | ___N/A___   |
| 18 |                               |     |                                                                                                                                                                                                                                                                                     |             |
| 19 |                               |     |                                                                                                                                                                                                                                                                                     |             |
| 20 | Dissemination policy          | 31a | Plans for investigators and sponsor to communicate trial results to participants, healthcare professionals, the public, and other relevant groups (eg, via publication, reporting in results databases, or other data sharing arrangements), including any publication restrictions | ___19___    |
| 21 |                               |     |                                                                                                                                                                                                                                                                                     |             |
| 22 |                               |     |                                                                                                                                                                                                                                                                                     |             |
| 23 |                               |     |                                                                                                                                                                                                                                                                                     |             |
| 24 |                               |     |                                                                                                                                                                                                                                                                                     |             |
| 25 |                               | 31b | Authorship eligibility guidelines and any intended use of professional writers                                                                                                                                                                                                      | ___19___    |
| 26 |                               |     |                                                                                                                                                                                                                                                                                     |             |
| 27 |                               | 31c | Plans, if any, for granting public access to the full protocol, participant-level dataset, and statistical code                                                                                                                                                                     | ___N/A___   |
| 28 |                               |     |                                                                                                                                                                                                                                                                                     |             |
| 29 | <b>Appendices</b>             |     |                                                                                                                                                                                                                                                                                     |             |
| 30 |                               |     |                                                                                                                                                                                                                                                                                     |             |
| 31 | Informed consent materials    | 32  | Model consent form and other related documentation given to participants and authorised surrogates                                                                                                                                                                                  | ___N/A___   |
| 32 |                               |     |                                                                                                                                                                                                                                                                                     |             |
| 33 |                               |     |                                                                                                                                                                                                                                                                                     |             |
| 34 | Biological specimens          | 33  | Plans for collection, laboratory evaluation, and storage of biological specimens for genetic or molecular analysis in the current trial and for future use in ancillary studies, if applicable                                                                                      | ___N/A___   |
| 35 |                               |     |                                                                                                                                                                                                                                                                                     |             |
| 36 |                               |     |                                                                                                                                                                                                                                                                                     |             |

37 \*It is strongly recommended that this checklist be read in conjunction with the SPIRIT 2013 Explanation & Elaboration for important clarification on the items.  
 38 Amendments to the protocol should be tracked and dated. The SPIRIT checklist is copyrighted by the SPIRIT Group under the Creative Commons  
 39 "[Attribution-NonCommercial-NoDerivs 3.0 Unported](https://creativecommons.org/licenses/by-nc-nd/3.0/)" license.  
 40

# BMJ Open

## Protocol for a pragmatic randomised controlled trial of Body Brain Life – GP and a Lifestyle Modification Program to decrease dementia risk exposure in a primary care setting

|                                 |                                                                                                                                                                                                                                                                                                                                                                                                                                                                                                                                                                                                                                                                                                                                                                                                                                                                                                                        |
|---------------------------------|------------------------------------------------------------------------------------------------------------------------------------------------------------------------------------------------------------------------------------------------------------------------------------------------------------------------------------------------------------------------------------------------------------------------------------------------------------------------------------------------------------------------------------------------------------------------------------------------------------------------------------------------------------------------------------------------------------------------------------------------------------------------------------------------------------------------------------------------------------------------------------------------------------------------|
| Journal:                        | <i>BMJ Open</i>                                                                                                                                                                                                                                                                                                                                                                                                                                                                                                                                                                                                                                                                                                                                                                                                                                                                                                        |
| Manuscript ID                   | bmjopen-2017-019329.R3                                                                                                                                                                                                                                                                                                                                                                                                                                                                                                                                                                                                                                                                                                                                                                                                                                                                                                 |
| Article Type:                   | Protocol                                                                                                                                                                                                                                                                                                                                                                                                                                                                                                                                                                                                                                                                                                                                                                                                                                                                                                               |
| Date Submitted by the Author:   | 09-Feb-2018                                                                                                                                                                                                                                                                                                                                                                                                                                                                                                                                                                                                                                                                                                                                                                                                                                                                                                            |
| Complete List of Authors:       | Kim, Sarang; Australian National University, Centre for Research on Ageing, Health and Wellbeing<br>McMaster, Mitchell; Australian National University, Centre for Research on Ageing, Health and Wellbeing<br>Torres, Susan ; Deakin University<br>Cox, Kay L.<br>Lautenschlager, Nicola; University of Melbourne, Academic Unit of Psychiatry of Old Age<br>Rebok, George; Johns Hopkins Bloomberg School of Public Health, Psychiatry and Behavioral Sciences<br>Pond, Dimity; University of Newcastle Australia, General Practice<br>D'Este, Catherine; ANU College of Medicine, Biology and Environment The Australian National University, National Centre for Epidemiology and Population Health (NCEPH)<br>McRae, Ian; Australian National University, School of Population Health<br>Cherbuin, Nicolas; Australian National University, Centre for Research on Ageing, Health and Wellbeing<br>Anstey, Kaarin |
| <b>Primary Subject Heading</b>: | Public health                                                                                                                                                                                                                                                                                                                                                                                                                                                                                                                                                                                                                                                                                                                                                                                                                                                                                                          |
| Secondary Subject Heading:      | Medical education and training                                                                                                                                                                                                                                                                                                                                                                                                                                                                                                                                                                                                                                                                                                                                                                                                                                                                                         |
| Keywords:                       | RCT, Dementia < NEUROLOGY, Lifestyle change, online, Australia, General practice                                                                                                                                                                                                                                                                                                                                                                                                                                                                                                                                                                                                                                                                                                                                                                                                                                       |
|                                 |                                                                                                                                                                                                                                                                                                                                                                                                                                                                                                                                                                                                                                                                                                                                                                                                                                                                                                                        |

SCHOLARONE™  
Manuscripts

1  
2  
3  
4  
5  
6 Protocol for a pragmatic randomised controlled trial of Body Brain Life – GP and a Lifestyle  
7  
8 Modification Program to decrease dementia risk exposure in a primary care setting  
9  
10  
11  
12  
13  
14  
15  
16  
17

18  
19 Authors: Sarang Kim<sup>1\*</sup>, Mitchell McMaster<sup>1</sup>, Susan Torres<sup>2</sup>, Kay Cox<sup>3</sup>, Nicola  
20  
21 Lautenschlager<sup>4</sup>, George Rebok<sup>5</sup>, Dimity Pond<sup>6</sup>, Catherine D’Este<sup>7</sup>, Ian McRae<sup>1</sup>, Nicolas  
22  
23 Cherbuin<sup>1</sup>, Kaarin J Anstey<sup>1</sup>  
24  
25  
26  
27

28  
29 <sup>1</sup> Centre for Research on Ageing Health & Wellbeing, Australian National University,  
30  
31 Canberra, Australia  
32

33  
34 <sup>2</sup> School of Exercise and Nutrition Sciences, Deakin University, Burwood, Australia  
35

36  
37 <sup>3</sup> University of Western Australia Medical School, Crawley, Australia  
38

39  
40 <sup>4</sup> Academic Unit for Psychiatry of Old Age, University of Melbourne, Melbourne, Australia  
41

42  
43 <sup>5</sup> Johns Hopkins Center on Aging and Health, Baltimore, USA  
44

45  
46 <sup>6</sup> School of Medicine and Public Health, University of Newcastle, Callaghan, Australia  
47

48  
49 <sup>7</sup> National Centre for Epidemiology & Population Health, Australian National University,  
50  
51 Canberra, Australia  
52  
53  
54  
55  
56  
57  
58  
59  
60

1  
2  
3  
4  
5  
6 Corresponding author:  
7

8 Dr Sarang Kim  
9

10 Centre for Research on Ageing Health & Wellbeing, Building 54, Mills Road, Australian  
11  
12

13 National University, Acton ACT 2601, Australia  
14  
15

16 E: [sarang.kim@anu.edu.au](mailto:sarang.kim@anu.edu.au)  
17

18  
19 T: +61 2 6125 0713  
20  
21  
22  
23

24 Word count: 4919  
25  
26

27 Issue date: 9 February 2018  
28  
29

30 Protocol Amendment Number: 03  
31  
32  
33  
34  
35  
36  
37  
38  
39  
40  
41  
42  
43  
44  
45  
46  
47  
48  
49  
50  
51  
52  
53  
54  
55  
56  
57  
58  
59  
60

## Abstract

**Introduction:** It has been estimated that a 10% to 25% reduction in seven key risk factors could potentially prevent 1.1 to 3.0 million Alzheimer's disease cases globally. In addition, as dementia is preceded by more subtle cognitive deficits which have substantial social and economic impact, effective preventative interventions would likely have more extensive benefits. The current study evaluates in primary care a multi-domain risk reduction intervention targeting adults with high risk of developing dementia.

**Methods and analysis:** A randomised controlled trial (RCT) is being conducted to evaluate three intervention programs using a pragmatic approach suitable to the clinic: 1) A 12-week online and face-to-face dementia risk reduction intervention (BBL-GP); 2) A 6-week face-to-face group lifestyle modification program (LMP); and 3) A 12-week email-only program providing general health information. We aim to recruit 240 participants, aged 18 and over, to undergo a comprehensive cognitive and physical assessment at baseline and follow ups (post intervention, 18, 36 and 62 weeks). The primary outcome is dementia risk measured with the modified version of the ANU-ADRI-Short Form. Secondary outcomes are cognitive function measured with Trail A and B, and the DSMT; physical activity with Moderate-Vigorous Physical Activity and the IPAQ; depression with the CES-D; cost evaluation with the SF-12 health survey, Framingham CHD, and AUSDRISK; diet quality with the ARFS; and sleep quality with the PSQI.

**Ethics and dissemination:** This RCT is a novel pragmatic intervention applied in a primary care setting to reduce the dementia risk exposure in adults at high risk. If successful, BBL-GP and LMP will provide a versatile, evidence-based package that can be easily and quickly rolled-out to other primary care settings and which can be scaled up at relatively low cost compared to other strategies involving intensive interventions.



1  
2  
3 Trial registration: Reg. no. ACTRN12616000868482  
4  
5  
6  
7

8 Keywords: RCT, dementia, lifestyle change, online, physical activity, diet, cardiovascular  
9  
10 risk factors, Australia, general practice, primary care.  
11  
12  
13  
14  
15  
16  
17  
18  
19  
20  
21  
22  
23  
24  
25  
26  
27  
28  
29  
30  
31  
32  
33  
34  
35  
36  
37  
38  
39  
40  
41  
42  
43  
44  
45  
46  
47  
48  
49  
50  
51  
52  
53  
54  
55  
56  
57  
58  
59  
60

For peer review only

### Strengths and limitations of this study

- BBL-GP program has been built on our dementia prevention research program which has been shown to reduce cognitive decline in older adults at-risk of dementia.
- This pragmatic trial evaluates a multi-domain risk reduction intervention in primary care targeting adults at increased risk of developing dementia.
- A naturalistic approach ensures the program can be adapted efficiently in primary care settings if proven effective.
- We are aware that most of our outcomes are self-reported and therefore can be subjective. Accordingly, we will interpret data conservatively.

## Introduction

No cure is available for Alzheimer's disease (AD) and other types of dementia. However, it is estimated that an achievable 10% to 25% reduction in seven key risk factors could prevent 1.1 to 3.0 million AD cases internationally (1). It is also estimated that if each of seven risk factors was to be reduced by 5%, 10%, 15% and 20% per decade, dementia prevalence would be reduced by between 1.6 and 7.2% in 2020, 3.3-14.9% in 2030, 4-9 – 22.8% in 2040 and 6.6-30.7% in 2050 (2). Furthermore, as dementia is preceded by more subtle cognitive deficits which have substantial social and economic impacts, effective preventative interventions would likely have additional benefits.

Increasingly and to afford a greater chance of producing detectable changes during study timeframes, the dementia research community has focused on multi-domain interventions that address multiple risk factors simultaneously (3). Among individuals with high risk factor burden, cognitive decline can be reduced (and possibly reversed) as a result of cardiovascular risk reduction and increase in activities that stimulate and protect the brain including cognitive, social and physical activity (PA) and an appropriate diet (4). AD and cardiovascular disease share cardiometabolic and lifestyle risk factors and cardiovascular risk reduction can be achieved by smoking cessation, increasing physical activities, adopting a healthy diet, reducing abnormally high blood pressure and cholesterol in mid-life, and managing major depression, overweight/obesity in mid-life and diabetes if present (5). Altogether, the literature supports the view that multi-domain interventions aimed at reducing cardiometabolic risk and promoting behaviours shown to protect against dementia will contribute to preventing cognitive decline, reduce overall risk of AD, and lower depressive symptoms.

Insufficient PA is the risk factor with the most evidence to support its role as a treatment for Mild Cognitive Impairment (MCI) (6) and more generally cognitive decline (7).

1  
2  
3 PA has also been shown in RCTs to benefit several other risk factors for dementia including  
4 depression (8), and cardiovascular risk factors (9). PA not only modifies multiple risk factors  
5 but it has direct benefits for brain health and cognition.  
6  
7

8  
9 To bring about risk reduction, there needs to be long-lasting behavioural change in  
10 multiple areas. Achieving this requires using techniques such as goal setting, decreasing  
11 barriers to change, improving self-monitoring, having access to information, and maintaining  
12 motivation (10, 11). Therefore, this RCT investigates whether lifestyle management  
13 programs that offer not only health promoting information, but also practical behaviour  
14 change techniques which can be implemented in daily life can reduce dementia risk.  
15  
16  
17  
18  
19  
20  
21

### 22 *Recruitment in general practice setting*

23  
24 Primary care is an ideal setting for the implementation of the current program because  
25 it is where adults with high risk of developing dementia are identified and early intervention  
26 and treatment are provided (12). Assessment of cardiovascular risk factors is common in  
27 primary care, as is advice about PA and diet. General practitioners (GP) commonly screen for  
28 diabetes and increasingly identify depression. GPs are often the first point of contact for  
29 patients who are worried that they may have dementia (13).  
30  
31  
32  
33  
34  
35  
36

37 Although there has been one study conducted in primary care setting with elderly  
38 participants (70-78 years old) addressing cardiovascular risk factors (14), the current program  
39 is the first of its kind to provide interventions to adults (18 years and above) at the primary  
40 care setting, addressing both cardiovascular and lifestyle risk factors of dementia.  
41  
42  
43  
44  
45

## 46 **Methods and analysis**

### 47 *Study setting and design*

48  
49 This project is a 6-12 week, pragmatic single-blind randomised controlled trial that is  
50 designed to assist participants develop and maintain a healthy lifestyle, as well as manage  
51 chronic diseases. The study evaluates the implementation of an evidence-based dementia risk  
52  
53  
54  
55  
56  
57  
58  
59  
60

1  
2  
3 reduction program that we developed and have evaluated previously on volunteers (15) and  
4 which has now been adapted for primary care (BBL-GP). The primary care setting in which  
5 the study is held already conducted a lifestyle management program (LMP) aimed at helping  
6 to manage chronic disease and maintaining a healthy lifestyle. The LMP program was  
7 initially developed to consist of 12 sessions over 12 weeks. However, its format was changed  
8 prior to this trial to have 12 sessions over 6 weeks. This decision was made by the clinic  
9 which provides this program in order for the program to be offered 4 times a year. The  
10 current LMP program was chosen as a comparison condition for feasibility and to enable  
11 evaluation of an existing program for dementia and cardiovascular risk reduction. The  
12 efficacy of the existing LMP program had not previously been evaluated.

13  
14  
15  
16  
17  
18  
19  
20  
21  
22  
23  
24 The existing LMP program included 6 weeks of face-to-face group education sessions.  
25  
26 The BBL-GP program included 12 weeks of individually tailored online education sessions  
27 with one hour face-to-face individual sessions with a dietitian and an exercise physiologist.  
28  
29 The BBL-GP and LMP are being compared to an active control group receiving weekly email  
30 with links to health information. The study is being conducted in Canberra, Australian  
31  
32  
33  
34  
35  
36  
37  
38  
39  
40  
41  
42  
43  
44  
45  
46  
47  
48  
49  
50  
51  
52  
53  
54  
55  
56  
57  
58  
59  
60  
The BBL-GP and LMP are being compared to an active control group receiving weekly email with links to health information. The study is being conducted in Canberra, Australian Capital Territory, Australia. The trial has been designed and is conducted according to the Consolidated Standards of Reporting Trials (CONSORT) statements for non-pharmaceutical (16) and pragmatic (17) trials and is reported according to the Standard Protocol Items: Recommendations for Intervention Trials (SPIRIT) guidelines (18).

### *Participants*

Participants are being recruited from the National Health Co-op (NHC), the largest bulk billing general practice organisation in Canberra comprising of eight clinics. Bulk Billing is a payment option where the doctor bills directly the universal health insurance system (Medicare) in Australia for a medical service that the patients receive. Invitation emails have been sent to all members excluding members who are inactive (those who did not renew their

1  
2  
3 memberships), those aged less than 18 years, or without email addresses. Posters at the  
4  
5 clinics are also being used for the recruitment. Potential participants who express their  
6  
7 interest by contacting the LMP coordinator at the NHC or registering on the NHC's website  
8  
9 are assessed against the inclusion and exclusion criteria. These are the types of adults who a  
10  
11 GP would refer to a dementia risk reduction trial in 'real life' and on whom we are aiming to  
12  
13 evaluate our intervention in a naturalistic context. In addition, risk factors for dementia exert  
14  
15 their influence over decades and thus the earlier one decreases their risk exposure, the more  
16  
17 impact it is likely to have over their lifespan. Therefore, this intervention program is open to  
18  
19 anyone aged 18 and older. If criteria are met, information sheets and consent forms are sent to  
20  
21 potential participants. Upon return of consent forms via email, each participant is officially  
22  
23 registered to the study and allocated a unique identity number as well as an online account.  
24  
25 Recruitment began in July 2016 for the duration of 13 months.  
26  
27

### 28 29 *Inclusion criteria*

30  
31  
32 A naturalistic approach is used in recruitment and the study inclusion criteria being used for  
33  
34 this study are those already used by the NHC to refer patients to the LMP program (prior to  
35  
36 this research project). The inclusion criteria is pragmatic as the practice already had criteria  
37  
38 for referral to their LMP and in developing the protocol, it became clear that introducing a  
39  
40 second set of inclusion criteria would make implementation difficult and reduce participant  
41  
42 numbers. We therefore decided to use the principle that if a GP would refer the patient to the  
43  
44 LMP then they would be eligible for the trial. This is a pragmatic feature of the current trial  
45  
46 that significantly differs from our original BBL trial. We aimed to optimise the seamlessness  
47  
48 of the intervention in primary care and utilise existing referral pathways to increase the  
49  
50 probability that the intervention is conducted in a manner that could lead to implementation  
51  
52 in real life. Participants must be aged 18 years and over, reside in the Australian Capital  
53  
54 Territory, be current financial members of the NHC, have access to a computer and internet  
55  
56  
57  
58  
59  
60

1  
2  
3 connection at home, be fluent in English, Australian permanent residents or citizens (for bulk  
4 billing eligibility), and must be the only person in their household who is taking part in this  
5 study to prevent being randomly assigned to different groups and sharing information about  
6 their interventions with each other received. To be eligible for the study, participants are also  
7 required to have a chronic health condition (high blood pressure, heart disease, type 2  
8 diabetes or 'pre-diabetes', osteoporosis, osteoarthritis, polycystic ovary syndrome (PCOS),  
9 kidney or liver disease, and depression/anxiety) or be overweight or obese (BMI>25). They  
10 are also required to agree to commit 1-2 hours a week to complete the program and be  
11 interested in obtaining advice on improving their lifestyle to reduce the risk of or better  
12 manage chronic disease. Participants are required to complete online assessments and attend  
13 NHC at baseline and 18, 36, and 62 weeks after commencement of the intervention for  
14 medical and cognitive assessments.  
15  
16  
17  
18  
19  
20  
21  
22  
23  
24  
25  
26  
27

### 28 29 *Exclusion criteria*

30  
31  
32 Participants are not eligible to enrol in the trial if they have significant and unstable medical  
33 and psychiatric conditions that would prevent participation in the trial. They are also  
34 ineligible if they have sensory deficits or mobility limitations that would prevent or  
35 substantially restrict the delivery of the assessment or intervention, have cognitive  
36 impairment, or are pregnant. Those who have previously participated in the LMP were  
37 excluded from participation. However, those who may be/have been participating in other  
38 trials, unknown to authors, were not excluded.  
39  
40  
41  
42  
43  
44  
45  
46  
47

### 48 *Sample size calculations*

49  
50 Sample size calculations were estimated using G\*Power (version 3.1.9.2;  
51 <http://www.gpower.hhu.de/en.html>) and have been based on medium effect size as  
52 observed in the previous Body Brain Life project with same primary outcome (19). To  
53  
54  
55  
56  
57  
58  
59  
60

1  
2  
3 detect a medium effect (0.5 standard deviation (SD)) in a 3-group design (1:1:1), 4  
4 measurements with a 5% risk of type 1 error ( $\alpha$ ) and 80% power, a total sample size of  
5 159 persons is required. To account for a 33% attrition (based on previous lifestyle  
6 modification program by NHC using the same inclusion and exclusion criteria and  
7 targeting same age group), a baseline sample of 240 is being recruited (80 in BBL-GP  
8 group, 80 in LMP group and 80 in control group).

### 16 *Assessments*

19 Participants who meet all inclusion and no exclusion criteria are invited to complete online  
20 surveys and visit NHC for the baseline evaluation, and for week 18, 36, and 62 follow ups.  
21 Immediate follow up is also conducted online at week 7 for LMP, and week 13 for BBL-GP  
22 and control groups. Table 1 summarises the assessment measures and schedule.

### 28 *Screening measures and covariate*

31 In addition to the above inclusion and exclusion criteria, further screening measures are  
32 conducted to ensure that participants are capable of taking part in the study. The Adult Pre-  
33 exercise Screening System (APSS) (20) is used at the baseline assessment to identify  
34 individuals with acute/high risk conditions, or who may be at higher risk of an adverse event  
35 during exercise. To screen for any cognitive impairment ( $<25$ ), the Mini-Mental State  
36 Examination (MMSE) (21) is administered to participants aged 60 and older.

45 Health efficacy and motivation for healthiness subscales from the Multidimensional  
46 Health Questionnaire (MHQ) (22) is used to measure the extent to which people believe they  
47 have the ability, capability, skills and talents to take care of their own physical health, and to  
48 measure people's motivation to keep in good physical health.

### 54 *Primary outcome*



1  
2  
3 The primary outcome is one's exposure profile to demonstrated risk factors for AD. It is  
4 measured with a modified version of the Australian National University Alzheimer's Disease  
5 Risk Index – Short form (ANU-ADRI – SF) (23). The ANU-ADRI-SF is comprised of  
6 validated scales assessing 15 individual risk and protective factors for AD and dementia. Intra  
7 class correlation coefficients suggested that the reliability of the ANU-ADRI-SF compared to  
8 the original ANU-ADRI were moderate to strong (0.77 to 0.99) and statistically significant  
9 ( $p < .001$ ) except for cognitive activity. Therefore, for the assessment of engagement in  
10 cognitive activities levels only, items from the original ANU-ADRI (19, 24) are used in place  
11 of those from the ANU-ADRI-SF due to limitations of the latter.  
12  
13  
14  
15  
16  
17  
18  
19  
20  
21  
22

### 23 *Secondary outcomes*

24  
25 Secondary outcomes include cognitive function, PA level, depressive symptoms, cost of  
26 interventions, diet and sleep quality. They are measured as follows: cognitive function is  
27 assessed with processing speed, task switching and executive function using Trails A and B,  
28 and the Digit Symbol Modalities Test (DSMT). These tests were chosen because the  
29 executive function is the most sensitive cognitive domain to PA interventions (25) and a  
30 decline in processing speed is associated with cardiovascular risk factors (26). Both Trails  
31 and DSMT have been used widely and have been reported to have good reliability and  
32 validity (27-30). Moderate-vigorous Physical Activity (MVPA) is a continuous measure of  
33 activity that registers three or more Metabolic Equivalents (METs) for 10 minutes or longer  
34 on an ActiGraph Link activity monitor (<http://actigraphcorp.com/products/actigraph-link/>),  
35 which is worn for 7 days. Self-reported PA is also being recorded using the short form of the  
36 International Physical Activity Questionnaire (IPAQ) (31), which is part of the ANU-ADRI-  
37 SF. Reliability and validity of IPAQ has been tested and confirmed across 12 countries (31).  
38 Depression is being assessed with the Centre for Epidemiological Studies Depression (CES-  
39  
40  
41  
42  
43  
44  
45  
46  
47  
48  
49  
50  
51  
52  
53  
54  
55  
56  
57  
58  
59  
60

1  
2  
3 D) Scale (32), which is also part of the ANU-ADRI. CES-D scale has a very high internal  
4 consistency and validity (33).  
5  
6

7  
8 Health outcomes are assessed with the SF-12 health survey (34), Framingham  
9  
10 Coronary Heart Disease (CHD) Risk score (35), and Australian type 2 diabetes risk  
11  
12 assessment tool (AUSDRISK) (36) to enable cost effectiveness evaluation of the two health  
13  
14 promotion interventions. SF-12 measures both physical and mental health status and has  
15  
16 acceptable validity and reliability (37, 38). Framingham CHD is a validated tool to assess  
17  
18 cardiovascular diseases (39) and AUSDRISK is a diabetes risk assessment tool based on  
19  
20 demographic, lifestyle and simple anthropometric measures (36).  
21  
22

23  
24 Dietary quality is assessed with a food-based diet quality index, the Australian  
25  
26 Recommended Food Score (ARFS) (40). The ARFS is aligned with Australian Dietary  
27  
28 Guidelines (41) and the Australian Guide to Healthy Eating (42) recommendations. The  
29  
30 ARFS total ranges from 0 to 73 and includes eight subscales: vegetables (0 to 21), fruit (0 to  
31  
32 12), protein (0 to 7), vegetarian alternatives (0 to 6), grains (0 to 13), dairy (0 to 11), water (0  
33  
34 to 1), sauces and condiments (0 to 2). Higher scores indicate greater compliance with the  
35  
36 Australian Dietary Guidelines and therefore better diet quality. The ARFS has demonstrated  
37  
38 good validity and reproducibility (40).  
39  
40

41  
42 Lastly, the Pittsburgh Sleep Quality Index (PSQI) (43) is an effective instrument used  
43  
44 to measure the quality and patterns of sleep in adults. It differentiates “poor” from “good”  
45  
46 sleep quality by measuring seven areas (components): subjective sleep quality, sleep latency,  
47  
48 sleep duration, habitual sleep efficiency, sleep disturbances, use of sleeping medications, and  
49  
50 daytime dysfunction over the last month. PSQI reports great test-retest reliability (0.87) and  
51  
52 high correlations with sleep log data (44).  
53  
54

### 55 *Randomisation*

56  
57  
58  
59  
60

1  
2  
3 Upon completion of the baseline assessment, participants are randomly allocated into one of  
4 the three groups (see Table 2 and Figure 1). The allocation sequence is computer generated  
5 by an independent researcher and is not known to the study team at the time of enrolment and  
6 baseline assessment. A permuted block randomisation sequence comprising block sizes of 6  
7 stratified by gender and age group (18-49 vs 50+) is used. The project manager who is not  
8 involved with conducting assessments assigns the participants into groups according to the  
9 generated sequence and notifies participants of their group allocation via email.  
10  
11  
12  
13  
14  
15  
16  
17

### 18 *Interventions*

#### 19 *Group 1: Body Brain Life – General Practice (BBL-GP)*

20  
21 BBL-GP is an intervention package that builds on our dementia prevention research programs.  
22 This includes an online dementia risk reduction program called the Body Brain Life (BBL;  
23 Trial ID: ACTRN12612000147886) (15, 45) and the Fitness for the Ageing Brain Study  
24 (FABS; Trial ID: ACTRN 12609000755235) (46, 47). Contents for the BBL-GP online  
25 modules have been revised after extensive consumer evaluation by members of the  
26 Alzheimer’s Australia Consumer Dementia Research Network as well as members of the  
27 public and from participant feedback after the previous trial. The PA program has also been  
28 modified for a younger age-group to 18 years and older as previous programs targeted middle  
29 aged and older adults. The Actigraph device was introduced to measure the objective amount  
30 and intensity of PA. This revised program (Body Brain Life – Fit) was piloted with the  
31 general public (Trial ID: ACTRN12615000822583; manuscript in preparation).  
32  
33  
34  
35  
36  
37  
38  
39  
40  
41  
42  
43  
44  
45  
46  
47

48 Participants in the BBL-GP group are required to complete 8 modules (dementia  
49 literacy, risk factors, PA, nutrition, health, cognitive activity, social activity and mood)  
50 delivered online. Prior to commencing online modules, participants in the BBL-GP group  
51 also receive an individually tailored plan/program for both dietary and PA interventions  
52  
53  
54  
55  
56  
57  
58  
59  
60

1  
2  
3 developed and delivered by a dietitian and an exercise physiologist, respectively during a  
4 face-to-face assessment. This is to ensure the dietary prescription and level of PA are suitable  
5 and tailored to individual participants.  
6  
7

#### 8 9 *Physical activity session*

10  
11 The session duration and frequency of the PA program varies between participants based on  
12 baseline PA levels and individual tailoring. An exercise physiologist designs an individual  
13 program for the participant, delivers this in a face-to-face workshop and monitors the PA  
14 program via the returned diaries and telephone monitoring. For those not doing any regular  
15 PA at baseline, the target is 150 minutes/week moderate intensity PA, with moderate  
16 intensity defined as a score of 10-12 on the Borg Rating of Perceived Exertion scale (RPE)  
17 (48). For those who are doing regular PA but for less than 100 minutes/week, an additional  
18 100 minutes/week is prescribed, and for those meeting the target, an additional 50  
19 minutes/week is prescribed. Printed material guiding participants to increase their activity  
20 level with worksheets are also provided. A diary in the format of a calendar returned monthly  
21 for 24 weeks is used to record PA and RPE to assess PA and intensity adherence. Participants  
22 may develop a medical problem or undergo treatment that can make exercising difficult or  
23 impossible. If this happens, prescribed amount of exercise is reviewed and re-prescribed, or  
24 stopped.  
25  
26  
27  
28  
29  
30  
31  
32  
33  
34  
35  
36  
37  
38  
39  
40

#### 41 *Dietary session*

42  
43 Participants at baseline who had unintentional weight loss of 5 kg or weight gain of 5 kg over  
44 the previous six months were seen by the dietitian. Furthermore, participants whose diets at  
45 baseline scored low on one or more of the subscales of the (ARFS) (vegetables <14, fruit <8,  
46 protein <4, grains <9, dairy <8, water <1) (40), were also seen by the dietitian. Dietary  
47 counselling was provided by a trained dietitian and overseen by the coordinating dietitian.  
48  
49  
50  
51  
52  
53  
54  
55 During the one hour face-to-face counselling session, participants received individually  
56  
57  
58  
59  
60

1  
2  
3 tailored dietary advice and printed material explaining the diet in detail.

#### 4 5 *Follow ups*

6  
7 Participants in the BBL-GP group are monitored through phone calls at week 4, 12 (14 for  
8  
9 PA) and week 20 by the dietitian and exercise physiologist to monitor the progress and for  
10  
11 reassurance. In addition, they receive a general booster session at 12 months with a phone  
12  
13 call and a mailed-out booklet summarising materials from the online modules. They are being  
14  
15 asked to continue being active and follow a healthy eating plan after completion of the  
16  
17 intervention.  
18

#### 19 20 *Online modules*

21  
22 Once participants in the BBL-GP group have received face-to-face PA and dietary  
23  
24 counselling sessions, they are asked to log on to the trial website and complete one module  
25  
26 per week, each taking approximately 30-40 minutes. The 12-week program is detailed in  
27  
28 Table 3. The first 8 weeks include the completion of 8 educational and individually tailored  
29  
30 behaviour change modules. In the remaining 4 weeks, participants undertake online activities  
31  
32 focused on goal monitoring and revision of the modules materials. Tailoring of the six  
33  
34 behaviour change modules (weeks 3-8) is conducted using an automated algorithm that  
35  
36 presents content on the basis of whether or not the participant has a relevant risk factor, as  
37  
38 well as on the basis of their responses to several questions measuring psychological  
39  
40 determinants of behaviour. These questions are presented at the beginning of each of the  
41  
42 behaviour change modules. For instance, a person who is classified as having a poor diet (e.g.  
43  
44 lack of fish intake) on the basis of their responses on the ANU-ADRI, and who does not  
45  
46 regard himself/herself as a role model to others with respect to their diet habits is not  
47  
48 presented with information focusing on becoming a role model to others.  
49  
50

51  
52 The program is built in such a way that participants are only able to access the  
53  
54 relevant component of the intervention at a given time. The modules become active, 1 per  
55  
56  
57  
58  
59

1  
2  
3 week, on the same day for the first 8 weeks. Participants are unable to access a newly  
4  
5 activated module before completing the previously scheduled module. Each week,  
6  
7 participants receive a notification email on the same day of the week alerting them when a  
8  
9 new module has become active and a list of already activated modules that they have either  
10  
11 not started or completed. Participants who are late completing modules will be followed up  
12  
13 with an email from the project manager to identify if there is a reason (e.g. holidays, illness,  
14  
15 work commitments) preventing their participation, and encouraging them to continue with the  
16  
17 study. Compliance is recorded for each module if they are completed on time, delayed or not  
18  
19 completed.  
20  
21

### 22 23 *Group 2: Lifestyle Modification Program (LMP)*

24  
25 The lifestyle modification program (LMP), developed by NHC, is designed to provide  
26  
27 individuals with tools to help manage chronic disease and maintain a healthy lifestyle. LMP  
28  
29 is a six- week group program provided by various health professionals (dietitian, exercise  
30  
31 physiologist, nurse practitioner, psychologist, pharmacist, and sleep physician) providing  
32  
33 information on basic nutrition, meal planning, PA, health conditions, motivation and goals,  
34  
35 medications, and sleep. Every week, 2 sessions are provided on the same day with each  
36  
37 session lasting an hour. The course is currently run by the NHC for their patients to assist  
38  
39 them in improving their lifestyle and management of chronic disease so it is a pragmatic real-  
40  
41 life comparison condition. Attendance is recorded for compliance and motivation checking.  
42  
43

44  
45 Although the LMP is a free nationally recognised program that is designed to provide  
46  
47 individuals with tools to help manage chronic disease and maintain a healthy lifestyle,  
48  
49 evaluation of the program has not been carried out as yet. The attendance is recorded each  
50  
51 week to examine intervention fidelity.  
52  
53

### 54 55 *Group 3: Active control/Email only*

1  
2  
3 The active control group or email only group proceed with their normal activities and access  
4 health services as required over the trial period. Participants in this group also receive weekly  
5 emails containing links to various websites providing information on lifestyle risk factors and  
6 disease management for a duration of 12 weeks. The weekly emails contain several links, and  
7 participants are encouraged to spend approximately an hour each week browsing through the  
8 material. The material is generally organised around the same themes as the ones included in  
9 the BBL-GP program. An effort has been made to include links to relevant information and  
10 educational material, but that otherwise does not include the use of identifiable behaviour-  
11 change techniques which are the 'active ingredient' of the BBL-GP program. In addition,  
12 other than providing participants with the weekly emails, no further contact is made with the  
13 participants in this group, such as reminders and prompts that are provided to the BBL-GP  
14 group. Participants in this group receive a face-to-face, 1 hour risk reduction workshop that  
15 provides the information contained in the BBL-GP intervention as a mean of debriefing at the  
16 end of the intervention.  
17  
18  
19  
20  
21  
22  
23  
24  
25  
26  
27  
28  
29  
30  
31

### 32 *Masking*

33  
34 To prevent performance bias, research staff conducting the assessments remain masked to  
35 participants' group allocation. The contact person for participants' website queries, access  
36 issues, and technical difficulties is independent of all baseline assessment data. All  
37 participants are informed that they are being randomly allocated to one of three study groups  
38 and that one group may be more effective than others. They are also notified at the start of the  
39 study that one of these groups involves face-to-face group sessions which require them to  
40 travel to NHC head office. Hence, the research team members who recruit participants,  
41 conduct individual diet and PA sessions, and professionals who are involved in the LMP are  
42 naturally able to tell which group they have been allocated to. Nurses who conduct baseline  
43 and follow-up assessments are however masked to group allocation.  
44  
45  
46  
47  
48  
49  
50  
51  
52  
53  
54  
55  
56  
57  
58  
59  
60

### *Data management and monitoring*

A trial management committee is formed by the research team members (chief and co-investigators). Nursing staffs from NHC and research assistants collect, clean and send the study data to the committee on a weekly basis. Most data are automatically entered into excel files and other data are double-entered to SPSS files to prevent data entry errors. Data management is then handled independently from the researchers who interpret the data. All data are stored electronically and in an independent spreadsheet and SPSS data file, which is only accessible by the researchers involved in this study.

An independent Data Monitoring Committee (DMC) is established independently from the research team who are involved with collecting and managing data. The DMC provides an independent oversight of the trial and reviews general conduct of the trial and study data for participant safety. The DMC is comprised of independent, multidisciplinary experts in dementia research who makes recommendations regarding the continuation, modification or termination of the trial.

Adverse events (minor and serious) are monitored throughout the trial by the research team and any adverse events would be reported to the trial DMC. For this trial, an adverse event is defined as an unwanted and usually harmful outcome (e.g. physical injuries). The event may or may not be related to the intervention, but it occurs while the person is participating in the intervention, that is, while they are undertaking physical activities individually prescribed by the exercise physiologist.

There are no formal interim analyses planned, as it is not expected that adverse events would be differentially related to the interventions.

### *Statistical analyses*

Statistical analyses will be based on an intention-to-treat approach. As applied in the previous BBL project (15), multiple imputation and mixed models will be applied to analyse data. We



1  
2  
3 hypothesise that the effectiveness of the intervention programs will be in the following order:  
4 BBL-GP > LMP > active control. The hypothesis that BBL-GP will be more effective than  
5 LMP is based on research showing that a tailored program is better than a one size fits all  
6 group program in most cases (49). This is also based on the previous BBL project where  
7 those in BBL groups improved more than those in the control group. We will also adjust for  
8 compliance in completing the online modules and following recommendations provided by  
9 the dietitian and exercise physiologist (for BBL-GP group), or for attendance to weekly group  
10 sessions (for LMP group).  
11  
12  
13  
14  
15  
16  
17  
18  
19

### 20 *Ethics and trial registration*

21  
22 The Human Research Ethics Committee at the Australian National University has approved  
23 the study protocols and procedures (protocol #2016/157). This project has also been  
24 registered at the Australian New Zealand Clinical Trials Registry (ACTRN:  
25 12616000868482).  
26  
27  
28  
29

### 30 *Adverse events*

31  
32 This study evaluates lifestyle intervention programs to reduce risk factors for AD. The target  
33 population is adults in a primary care setting who have some of the known risk factors for  
34 dementia, but are at the time of the intervention, healthy and free of any dementia-related  
35 symptoms. We do not anticipate that participants are placed at a greater risk than that  
36 associated with self-driven educational activities over the Internet. An adverse event where a  
37 participant can get hurt during prescribed exercise can occur. To prevent this, we screen  
38 participants using APSS at the baseline assessment to identify individuals with acute/high  
39 risk conditions for exercise. In addition, the exercise physiologist individually tailors  
40 prescribed exercise to minimise risk of injury. Medical assessments are done by the  
41 participants' usual nurses and doctors and if any abnormality is detected in their results, they  
42 are required to discuss these abnormalities with participants as usual. To address issues of  
43  
44  
45  
46  
47  
48  
49  
50  
51  
52  
53  
54  
55  
56  
57  
58  
59  
60

1  
2  
3 potential fatigue, the assessments have been kept to a minimum length. In addition, all online  
4 and face-to-face sessions are designed in an interactive way and are limited to 1-hour sessions  
5 (LMP has 2 themed sessions per week and has a break between sessions). As mentioned  
6  
7 above, all online modules are delivered in an individually tailored fashion to maximise  
8  
9 relevance for each individual.  
10  
11  
12

### 13 *Dissemination plan*

14  
15 Positive, neutral and negative results of the trial will be submitted to international peer-  
16 reviewed journals. In addition, results will be presented at national and international  
17 conferences relevant to the subject matters. Authorship will be allocated using the guidelines  
18 for authorship defined by the International Committees of Medical Journal Editors and  
19 depends on personal involvement.  
20  
21  
22  
23  
24  
25

### 26 **Discussion**

27  
28 The project is currently under way as an evaluation of the efficacy of health promotion  
29 interventions in adults with risk factors for dementia. The program aims to reduce  
30 cardiometabolic risk and promote behaviours shown to protect against dementia. The trial,  
31 recruiting from a primary care setting has generated considerable interest, and to date,  
32 approximately half of the total target sample has been assessed and randomised into the  
33 intervention groups. We anticipate that all data collection will be completed by December  
34 2018. The results of the study are likely to form an evidence base for the feasibility of  
35 dementia risk reduction campaigns to lead to lifestyle changes and the reduction of dementia  
36 risk factors at the population level. This trial will also support the feasibility of such  
37 interventions being applied in primary care settings. Successful outcomes of the current trial  
38 may lead to significant public health impact and benefits once the intervention is made  
39 available at the population level pending positive results.  
40  
41  
42  
43  
44  
45  
46  
47  
48  
49  
50  
51  
52  
53

### 54 **Conclusion**

1  
2  
3 Interventions to reduce risk of developing dementia are needed as a cure is not available. This  
4 project compares three different approaches to promote healthy lifestyles and to reduce risk  
5 of developing dementia applied in a primary care setting. This unique trial demonstrates real  
6 life application of dementia risk reduction intervention rather than more controlled but less  
7 ecologically valid interventions typically tested in a research setting.  
8  
9  
10  
11  
12  
13  
14  
15  
16  
17  
18  
19  
20  
21  
22  
23  
24  
25  
26  
27  
28  
29  
30  
31  
32  
33  
34  
35  
36  
37  
38  
39  
40  
41  
42  
43  
44  
45  
46  
47  
48  
49  
50  
51  
52  
53  
54  
55  
56  
57  
58  
59  
60

For peer review only

## References

1. Barnes D, Yaffe K. The projected effect of risk factor reduction on Alzheimer's disease prevalence. *The Lancet Neurology*. 2011;10(9):819-28.
2. Ashby-Mitchell K, Burns R, Shaw J, Anstey KJ. Proportion of dementia in Australia explained by common modifiable risk factors. *Alzheimers Res Ther*. 2017;9(1):11.
3. Ngandu T, Lehtisalo J, Solomon A, Levälähti E, Ahtiluoto S, Antikainen R, et al. A 2 year multidomain intervention of diet, exercise, cognitive training, and vascular risk monitoring versus control to prevent cognitive decline in at-risk elderly people (FINGER): a randomised controlled trial. *The Lancet*. 2015;385(9984):2255-63.
4. Prince M, Albanese E, Guerchet M, Prina M. *World Alzheimer Report 2014: Dementia and Risk Reduction. An analysis of protective and modifiable factors*. London: ADI; 2014.
5. Santos CY, Snyder PJ, Wu W-C, Zhang M, Echeverria A, Alber J. Pathophysiologic relationship between Alzheimer's disease, cerebrovascular disease, and cardiovascular risk: A review and synthesis. *Alzheimer's & dementia: Diagnosis, Assessment & Disease Monitoring*. 2017;7:69-87.
6. Blondell SJ, Hammersley-Mather R, Veerman JL. Does physical activity prevent cognitive decline and dementia?: A systematic review and meta-analysis of longitudinal studies. *BMC Public Health*. 2014;14:510.
7. Northey JM, Cherbuin N, Pumpa KL, Smee DJ, Rattray B. Exercise interventions for cognitive function in adults older than 50: a systematic review with meta-analysis. *British Journal of Sports and Medicine*. 2017.
8. Mammen G, Faulkner G. Physical activity and the prevention of depression: a systematic review of prospective studies. *Am J Prev Med*. 2013;45(5):649-57.

- 1  
2  
3 9. Brouwer BG, van der Graaf Y, Soedamah-Muthu SS, Wassink AM, Visseren FL.  
4  
5 Leisure-time physical activity and risk of type 2 diabetes in patients with established vascular  
6  
7 disease or poorly controlled vascular risk factors. *Diabetes research and clinical practice*.  
8  
9 2010;87(3):372-8.  
10
- 11 10. Middleton KR, Anton SD, Perri MG. Long-term Adherence to Health Behavior  
12  
13 Change. *American Journal of Lifestyle Medicine*. 2013;7(6):395-404.  
14
- 15 11. Locke EA. Motivation through conscious goal setting. *Applied and Preventive*  
16  
17 *Psychology*. 1996;5(2):117-24.  
18
- 19 12. The Department of Health. National primary health care strategic framework: Primary  
20  
21 health care in Australia 2013 [Available from:  
22  
23 [http://www.health.gov.au/internet/publications/publishing.nsf/Content/NPHC-Strategic-](http://www.health.gov.au/internet/publications/publishing.nsf/Content/NPHC-Strategic-Framework~phc-australia)  
24  
25 [Framework~phc-australia](http://www.health.gov.au/internet/publications/publishing.nsf/Content/NPHC-Strategic-Framework~phc-australia).  
26  
27
- 28 13. Robinson L, Tang E, Taylor J-P. Dementia: timely diagnosis and early intervention.  
29  
30 *BMJ : British Medical Journal*. 2015;350.  
31  
32
- 33 14. van Charante EPM, Richard E, Eurelings LS, van Dalen J-W, Ligthart SA, van Bussel  
34  
35 EF, et al. Effectiveness of a 6-year multidomain vascular care intervention to prevent  
36  
37 dementia (preDIVA): a cluster-randomised controlled trial. *The Lancet*.  
38  
39 2016;388(10046):797-805.  
40
- 41 15. Anstey KJ, Bahar-Fuchs A, Herath P, Kim S, Burns R, Rebok GW, et al. Body brain  
42  
43 life: A randomized controlled trial of an online dementia risk reduction intervention in  
44  
45 middle-aged adults at risk of Alzheimer's disease. *Alzheimer's & Dementia: Translational*  
46  
47 *Research & Clinical Interventions*. 2015;1(1):72-80.  
48  
49
- 50 16. Boutron I, Moher D, Altman DG, Schulz KF, Ravaud P, for the CG. Extending the  
51  
52 consort statement to randomized trials of nonpharmacologic treatment: Explanation and  
53  
54 elaboration. *Ann Intern Med*. 2008;148(4):295-309.  
55  
56  
57  
58  
59  
60

- 1  
2  
3 17. Zwarenstein M, Treweek S, Gagnier JJ, Altman DG, Tunis S, Haynes B, et al.  
4  
5 Improving the reporting of pragmatic trials: an extension of the CONSORT statement. *BMJ*.  
6  
7 2008;337.
- 8  
9 18. Chan A, Tetzlaff JM, Altman DG, et al. Spirit 2013 statement: Defining standard  
10  
11 protocol items for clinical trials. *Ann Intern Med*. 2013;158(3):200-7.
- 12  
13 19. Anstey KJ, Cherbuin N, Herath P. Development of a new method for assessing global  
14  
15 risk of Alzheimer's disease for use in population health approaches to prevention. *Prev Sci*.  
16  
17 2013;14:411-21.
- 18  
19 20. Exercise & Sports Science Australia. Adult pre-exercise screening system 2011  
20  
21 [Available from: <https://www.essa.org.au/for-gps/adult-pre-exercise-screening-system/>.  
22  
23
- 24 21. Folstein MF, Folstein SE, McHugh PR. "Mini-mental state". A practical method for  
25  
26 grading the cognitive state of patients for the clinician. *J Psychiatr Res*. 1975;12(3):189-98.
- 27  
28 22. Snell WE, Jr., Johnson G. The Multidimensional Health Questionnaire. *American*  
29  
30 *Journal of Health Behavior*. 1997;21:33-42.
- 31  
32 23. Kim S, Cherbuin N, Anstey KJ. Assessing reliability of short and tick box forms of  
33  
34 the ANU-ADRI: Convenient alternatives of a self-report Alzheimer's disease risk assessment.  
35  
36 *Alzheimer's & Dementia: Translational Research & Clinical Interventions*. 2016;2(2):93-8.
- 37  
38 24. Anstey KJ, Cherbuin N, Herath P, Qiu C, Kuller LH, Lopez OL, et al. A self-report  
39  
40 risk index to predict occurrence of dementia in three independent cohorts of older adults: the  
41  
42 ANU-ADRI. *PLoS ONE*. 2014;9(1):e86141.
- 43  
44 25. Colcombe S, Kramer AF. Fitness effects on the cognitive function of older adults: a  
45  
46 meta-analytic study. *Psychol Sci*. 2003;14(2):125-30.
- 47  
48 26. Anstey KJ, Sargent-Cox K, Garde E, Cherbuin N, Butterworth P. Cognitive  
49  
50 development over 8 years in midlife and its association with cardiovascular risk factors.  
51  
52 *Neuropsychology*. 2014;28(4):653-65.
- 53  
54  
55  
56  
57  
58  
59  
60

- 1  
2  
3 27. Spreen O, Strauss E. A compendium of neuropsychological tests: administration,  
4 norms and commentary. New York: Oxford University Press; 1991.  
5  
6  
7 28. Arbuthnott K, Frank J. Trail Making Test, Part B as a Measure of Executive Control:  
8 Validation Using a Set-Switching Paradigm. *J Clin Exp Neuropsychol*. 2000;22(4):518-28.  
9  
10  
11 29. Giovagnoli AR, Del Pesce M, Mascheroni S, Simoncelli M, Laiacona M, Capitani E.  
12 Trail making test: normative values from 287 normal adult controls. *The Italian Journal of*  
13 *Neurological Sciences*. 1996;17(4):305-9.  
14  
15  
16 30. Smith A. Symbol digit modalities test: Manual. . Los Angeles: Western Psychological  
17 Services; 1982.  
18  
19  
20  
21  
22 31. Craig CL, Marshall AL, Sjoström M, Bauman AE, Booth ML, Ainsworth BE, et al.  
23 International physical activity questionnaire: 12-country reliability and validity. *Med Sci*  
24 *Sports Exerc*. 2003;35(8):1381-95.  
25  
26  
27  
28 32. Radloff L. The CES-D scale: A self report depression scale for research in the general  
29 population. *Applied Psychological Measurement*. 1977;1:385-401.  
30  
31  
32  
33 33. Radloff LS. The CES-D Scale:A Self-Report Depression Scale for Research in the  
34 General Population. *Applied Psychological Measurement*. 1977;1(3):385-401.  
35  
36  
37 34. Ware J, Jr., Kosinski M, Keller SD. A 12-Item Short-Form Health Survey:  
38 construction of scales and preliminary tests of reliability and validity. *Medical care*.  
39 1996;34(3):220-33.  
40  
41  
42  
43 35. Wilson PWF, D'Agostino RB, Levy D, Belanger AM, Silbershatz H, Kannel WB.  
44 Prediction of Coronary Heart Disease Using Risk Factor Categories. *Circulation*.  
45 1998;97(18):1837-47.  
46  
47  
48  
49  
50 36. Chen L, Magliano DJ, Balkau B, Colagiuri S, Zimmet PZ, Tonkin AM, et al.  
51 AUSDRISK: an Australian Type 2 Diabetes Risk Assessment Tool based on demographic,  
52  
53  
54  
55  
56  
57  
58  
59  
60

1  
2  
3 lifestyle and simple anthropometric measures. The Medical journal of Australia.  
4  
5 2010;192:197-202.

6  
7 37. Jakobsson U. Using the 12-item Short Form health survey (SF-12) to measure quality  
8  
9 of life among older people. Aging clinical and experimental research. 2007;19(6):457-64.

10  
11 38. Maruish ME. User's Manual for the SF-12v2 Health Survey (3rd ed.). Lincoln, RI:  
12  
13 Quality Metric Incorporated; 2012.

14  
15 39. Framingham Heart Study. [https://www.framinghamheartstudy.org/risk-](https://www.framinghamheartstudy.org/risk-functions/coronary-heart-disease/10-year-risk.php)  
16  
17 [functions/coronary-heart-disease/10-year-risk.php](https://www.framinghamheartstudy.org/risk-functions/coronary-heart-disease/10-year-risk.php) 2017 [Available from:  
18  
19 [https://www.framinghamheartstudy.org/risk-](https://www.framinghamheartstudy.org/risk-functions/coronary-heart-disease/10-year-risk.php)  
20  
21 [risk.php](https://www.framinghamheartstudy.org/risk-functions/coronary-heart-disease/10-year-</a><br/>22<br/>23 <a href=).

24  
25 40. Collins CE, Burrows TL, Rollo ME, Boggess MM, Watson JF, Guest M, et al. The  
26  
27 comparative validity and reproducibility of a diet quality index for adults: the Australian  
28  
29 Recommended Food Score. Nutrients. 2015;7(2):785-98.

30  
31 41. National Health and Medical Research Council. Australian Dietary Guidelines.  
32  
33 Canberra: National Health and Medical Research Council; 2013.

34  
35 42. National Health and Medical Research Council. Australian Guide to Healthy Eating.  
36  
37 Canberra: National Health and Medical Research Council; 2003.

38  
39 43. Buysse DJ, Reynolds CF, 3rd, Monk TH, Berman SR, Kupfer DJ. The Pittsburgh  
40  
41 Sleep Quality Index: a new instrument for psychiatric practice and research. Psychiatry  
42  
43 research. 1989;28(2):193-213.

44  
45 44. Backhaus J, Junghanns K, Broocks A, Riemann D, Hohagen F. Test-retest reliability  
46  
47 and validity of the Pittsburgh Sleep Quality Index in primary insomnia. J Psychosom Res.  
48  
49 2002;53(3):737-40.  
50  
51



- 1  
2  
3 45. Anstey KJ, Bahar-Fuchs A, Herath P, Rebok GW, Cherbuin N. A 12-week  
4  
5 multidomain intervention versus active control to reduce risk of Alzheimer's disease: study  
6  
7 protocol for a randomized controlled trial. *Trials*. 2013;14:60.  
8  
9 46. Lautenschlager NT, Cox KL, Flicker L, Foster JK, van Bockxmeer FM, Xiao J, et al.  
10  
11 Effect of physical activity on cognitive function in older adults at risk for Alzheimer disease:  
12  
13 a randomized trial. *JAMA*. 2008;300:1027-37.  
14  
15 47. Cyarto EV, Cox KL, Almeida OP, Flicker L, Ames D, Byrne G, et al. The fitness for  
16  
17 the Ageing Brain Study II (FABS II): protocol for a randomized controlled clinical trial  
18  
19 evaluating the effect of physical activity on cognitive function in patients with Alzheimer's  
20  
21 disease. *Trials*. 2010;11:120.  
22  
23 48. Borg GA. Psychophysical bases of perceived exertion. *Med Sci Sports Exerc*.  
24  
25 1982;14(5):377-81.  
26  
27 49. Kreuter MW, Oswald DL, Bull FC, Clark EM. Are tailored health education materials  
28  
29 always more effective than non-tailored materials? *Health Education Research*.  
30  
31 2000;15(3):305-15.  
32  
33  
34  
35  
36  
37  
38  
39  
40  
41  
42  
43  
44  
45  
46  
47  
48  
49  
50  
51  
52  
53  
54  
55  
56  
57  
58  
59  
60

### **Authors' contributions**

KJA conceived the study and built relationship with NHC. KJA, NC, SK developed the overall design of the intervention. NL and KC designed the implementation of the PA related intervention. CD and KJA designed the statistical analysis plan for the protocol. DP and GR contributed knowledge of primary care setting and advised on implementing the intervention in a GP clinic. ST designed the implementation of the dietary intervention. NC and SK managed the implementation of the online component in the dedicated web portal. SK, MM, ST, KC, NL, GR, DP, IM, NC and KJA wrote the study protocol and critically reviewed the manuscript.

### **Funding statement**

This work was supported by National Health and Medical Research Council (NHMRC) Centre of Research Excellence in Cognitive Health and development of original BBL modules was funded by the NHMRC Dementia Collaborative Research Centres. KJA is funded by NHMRC Fellowship APP1102694.

This funding source had no role in the design of this study and will not have any role during its execution, analyses, interpretation of the data, or decision to submit results.

### **Acknowledgements**

The investigators acknowledge the work of staff at the National Health Co-op and research staff at the Centre for Research on Ageing, Health and Wellbeing. The investigators would particularly like to acknowledge the valued contribution of the trial participants.

### **Competing interests**

None declared.

Table 1. Assessment measures at the baseline and follow up evaluations

| Assessment measure | Baseline | Immediate follow up<br>(Week 7 for LMP and<br>week 13 for BBL-GP<br>and active control<br>group) | Week 18 | Week 36 | Week 62 |
|--------------------|----------|--------------------------------------------------------------------------------------------------|---------|---------|---------|
| Screening          |          |                                                                                                  |         |         |         |
| APSS               | √        |                                                                                                  |         |         |         |
| MMSE (if 60+)      | √        |                                                                                                  |         |         |         |
| Questionnaires     |          |                                                                                                  |         |         |         |
| ANU-ADRI           | √        | √                                                                                                | √       | √       | √       |
| PSQI               | √        | √                                                                                                | √       | √       | √       |
| ARFS               | √        | √                                                                                                | √       | √       | √       |
| SF-12              | √        | √                                                                                                | √       | √       | √       |
| MHQ                | √        |                                                                                                  |         |         |         |

1  
2  
3  
4  
5  
6  
7  
8  
9  
10  
11  
12  
13  
14  
15  
16  
17  
18  
19  
20  
21  
22  
23  
24  
25  
26  
27  
28  
29  
30  
31  
32  
33  
34  
35  
36  
37  
38  
39  
40  
41  
42  
43  
44  
45  
46  
47

|                                                            |   |  |   |   |   |
|------------------------------------------------------------|---|--|---|---|---|
| Cognitive measures                                         |   |  |   |   |   |
| Trails A + B                                               | √ |  | √ | √ | √ |
| DSMT                                                       | √ |  | √ | √ | √ |
| Physical and medical evaluation<br>(by doctors and nurses) |   |  |   |   |   |
| MVPA                                                       | √ |  | √ | √ | √ |
| Blood pressure                                             | √ |  | √ | √ | √ |
| Height, cm                                                 | √ |  |   |   |   |
| Weight, kg                                                 | √ |  | √ | √ | √ |
| Waist and hip, cm                                          | √ |  | √ | √ | √ |
| Body Composition                                           | √ |  | √ | √ | √ |
| Framingham CHD                                             | √ |  | √ | √ | √ |
| AUSDRISK                                                   | √ |  | √ | √ | √ |

Note: APSS: Adults Pre-exercise Screening System; MMSE: Mini-Mental State Examination; ANU-ADRI: Australian National University – Alzheimer’s Disease Risk Index; PSQI: Pittsburgh Sleep Quality Index; ARFS: Australian Recommended Food Score; SF-12: SF-12 Health

1  
2  
3  
4  
5 Survey;; MHQ: Multidimensional Health Questionnaire; DSMT: Digit Symbol Modalities Test; MVPA: Moderate-Vigorous Physical Activity;  
6  
7 Framingham CHD: Framingham Coronary Heart Disease Risk score; AUSDRISK: Australian type 2 diabetes risk assessment tool.  
8  
9  
10  
11  
12  
13  
14  
15  
16  
17  
18  
19  
20  
21  
22  
23  
24  
25  
26  
27  
28  
29  
30  
31  
32  
33  
34  
35  
36  
37  
38  
39  
40  
41  
42  
43  
44  
45  
46  
47

For peer review only

1  
2  
3  
4  
5  
6  
7  
8  
9  
10  
11  
12  
13  
14  
15  
16  
17  
18  
19  
20  
21  
22  
23  
24  
25  
26  
27  
28  
29  
30  
31  
32  
33  
34  
35  
36  
37  
38  
39  
40  
41  
42  
43  
44  
45  
46  
47

Table 2: Comparison of intervention programs

|                     | LMP                                                        | BBL-GP                                                                                                                | Active control                                                                                                                              |
|---------------------|------------------------------------------------------------|-----------------------------------------------------------------------------------------------------------------------|---------------------------------------------------------------------------------------------------------------------------------------------|
| Previously applied: | Yes, in primary care. Evaluation has not been carried out. | Yes, with member of general public with concern about developing dementia. Never been tested in primary care setting. | Yes, with member of general public with concern about developing dementia.                                                                  |
| Duration            | 6 weeks                                                    | 12 weeks                                                                                                              | 12 weeks                                                                                                                                    |
| Frequency           | Weekly                                                     | Weekly                                                                                                                | Weekly                                                                                                                                      |
| Number of sessions  | 12 sessions (2 sessions per week)                          | 8 online sessions, 1 session with dietitian, 1 session with exercise physiologist                                     | 12 emails containing links to various websites providing information on lifestyle risk factors and disease management                       |
| Format              | Face-to-face group sessions                                | 1 hour individual session with dietitian, 1 hour individual session with exercise physiologist, 8 online modules      | Weekly emails containing health information such as health status of Australians, PA and nutrition, alcohol and tobacco, and mental health. |

Table 3: Description of the 12-week online program delivered through the Body Brain Life – GP (BBL-GP) website

| Week | Activity                                   | Description                                                                                                                                                                                                                                                                                                                                                                                                                                                                                                                                                                                 |
|------|--------------------------------------------|---------------------------------------------------------------------------------------------------------------------------------------------------------------------------------------------------------------------------------------------------------------------------------------------------------------------------------------------------------------------------------------------------------------------------------------------------------------------------------------------------------------------------------------------------------------------------------------------|
| 1    | Module 1: Dementia literacy                | The first module focuses on providing participants with general information about dementia including types, causes, prevalence, social and economic impact, symptoms, brain function, treatment, risk factors (modifiable and non-modifiable), and prevention. This module serves as an introduction to the subsequent modules.                                                                                                                                                                                                                                                             |
| 2    | Module 2: Dementia risk factors            | This module is aimed at building awareness and knowledge of the various health conditions associated with an increased risk of AD. Specifically, this module provides details regarding the association between AD and several medical conditions (abnormal weight, high cholesterol, diabetes, hypertension, and depression), as well as lifestyle factors (alcohol use and smoking, PA, nutrition, stroke and head injury, mental health, social and cognitive engagement). The module also briefly covers non-modifiable risk factors that contribute to AD, including age and genetics. |
| 3    | Module 3: BBL FIT - PA                     | This is a theory-driven, individually-tailored module that aims to help participants incorporate regular PA into their daily routine and reduce sedentary behaviour by focusing on increasing endurance, strength, balance, and flexibility. This module targets several barriers to engaging in PA, such as increasing motivation, creating opportunities to exercise, and developing a social network that supports PA goals.                                                                                                                                                             |
| 4    | Module 4: BBL nutrition                    | This is a theory-driven, individually-tailored module aimed at helping people develop healthy dietary habits. This module targets the risk associated with abnormal weight, and the protective effects associated with fish intake and other dietary components.                                                                                                                                                                                                                                                                                                                            |
| 5    | Module 5: BBL health self-management       | This is a theory-driven, individually-tailored module aimed at increasing participants' health monitoring and management of chronic health conditions. Because several chronic health conditions such as hypertension, diabetes and high cholesterol, are associated with increased risk for dementia, prevention and appropriate management of such conditions is also likely to be protective against dementia.                                                                                                                                                                           |
| 6    | Module 6: BBL Think – cognitive engagement | This is a theory-driven, individually-tailored module aimed at increasing participants' levels of engagement with mentally stimulating activities such as reading, doing crosswords and visiting museums, which is a protective factor against dementia.                                                                                                                                                                                                                                                                                                                                    |
| 7    | Module 7: BBL connect – social engagement  | This is a theory-driven, individually-tailored module aimed at increasing participants' levels of social engagement. The module targets the risk factor for dementia associated                                                                                                                                                                                                                                                                                                                                                                                                             |

1  
2  
3  
4  
5  
6  
7  
8  
9  
10  
11  
12  
13  
14  
15  
16  
17  
18  
19  
20  
21  
22  
23  
24  
25  
26  
27  
28  
29  
30  
31  
32  
33  
34  
35  
36  
37  
38  
39  
40  
41  
42  
43  
44  
45  
46  
47

|   |                                       |                                                                                                                                                                                                                                                                                                                                           |
|---|---------------------------------------|-------------------------------------------------------------------------------------------------------------------------------------------------------------------------------------------------------------------------------------------------------------------------------------------------------------------------------------------|
|   |                                       | with loneliness and depression, and the protective effects of regular social engagement.                                                                                                                                                                                                                                                  |
| 8 | Module 8: BBL mood                    | This is a theory-driven, individually-tailored module that aims to help participants monitor and maintain good mental health. The module targets risk factors for dementia associated with mental health and mood, focusing on depression and anxiety. Information is provided on symptoms, types, treatment, and tips for managing mood. |
| 9 | 9 to 12 Self-guided online activities | During these sessions, participants are encouraged to engage in a range of online activities for 1 h, including accessing the many tools they have accumulated during the first 7 weeks. Examples include the goal-setting tool, behaviour-monitoring tool, unhelpful thoughts monitoring tool, videos, and so on.                        |

For peer review only



1  
2  
3 Figure 1. Study Flowchart  
4  
5  
6  
7  
8  
9  
10  
11  
12  
13  
14  
15  
16  
17  
18  
19  
20  
21  
22  
23  
24  
25  
26  
27  
28  
29  
30  
31  
32  
33  
34  
35  
36  
37  
38  
39  
40  
41  
42  
43  
44  
45  
46  
47  
48  
49  
50  
51  
52  
53  
54  
55  
56  
57  
58  
59  
60

For peer review only



Figure 1: Study Flowchart

225x300mm (300 x 300 DPI)



SPIRIT 2013 Checklist: Recommended items to address in a clinical trial protocol and related documents\*

| Section/item                      | Item No | Description                                                                                                                                                                                                                                                                              | Addressed on page number |
|-----------------------------------|---------|------------------------------------------------------------------------------------------------------------------------------------------------------------------------------------------------------------------------------------------------------------------------------------------|--------------------------|
| <b>Administrative information</b> |         |                                                                                                                                                                                                                                                                                          |                          |
| Title                             | 1       | Descriptive title identifying the study design, population, interventions, and, if applicable, trial acronym                                                                                                                                                                             | ___1___                  |
| Trial registration                | 2a      | Trial identifier and registry name. If not yet registered, name of intended registry                                                                                                                                                                                                     | ___4, 18___              |
|                                   | 2b      | All items from the World Health Organization Trial Registration Data Set                                                                                                                                                                                                                 | ___N/A___                |
| Protocol version                  | 3       | Date and version identifier                                                                                                                                                                                                                                                              | ___2___                  |
| Funding                           | 4       | Sources and types of financial, material, and other support                                                                                                                                                                                                                              | ___26___                 |
| Roles and responsibilities        | 5a      | Names, affiliations, and roles of protocol contributors                                                                                                                                                                                                                                  | ___1, 26___              |
|                                   | 5b      | Name and contact information for the trial sponsor                                                                                                                                                                                                                                       | ___N/A___                |
|                                   | 5c      | Role of study sponsor and funders, if any, in study design; collection, management, analysis, and interpretation of data; writing of the report; and the decision to submit the report for publication, including whether they will have ultimate authority over any of these activities | ___29___                 |
|                                   | 5d      | Composition, roles, and responsibilities of the coordinating centre, steering committee, endpoint adjudication committee, data management team, and other individuals or groups overseeing the trial, if applicable (see Item 21a for data monitoring committee)                         | ___N/A___                |

1  
2  
3  
4  
5  
6  
7  
8  
9  
10  
11  
12  
13  
14  
15  
16  
17  
18  
19  
20  
21  
22  
23  
24  
25  
26  
27  
28  
29  
30  
31  
32  
33  
34  
35  
36  
37  
38  
39  
40  
41  
42  
43  
44  
45  
46  
47**Introduction**

|                          |    |                                                                                                                                                                                                           |             |
|--------------------------|----|-----------------------------------------------------------------------------------------------------------------------------------------------------------------------------------------------------------|-------------|
| Background and rationale | 6a | Description of research question and justification for undertaking the trial, including summary of relevant studies (published and unpublished) examining benefits and harms for each intervention        | ___ 5-8 ___ |
|                          | 6b | Explanation for choice of comparators                                                                                                                                                                     | ___ 7-8 ___ |
| Objectives               | 7  | Specific objectives or hypotheses                                                                                                                                                                         | ___ 7 ___   |
| Trial design             | 8  | Description of trial design including type of trial (eg, parallel group, crossover, factorial, single group), allocation ratio, and framework (eg, superiority, equivalence, noninferiority, exploratory) | ___ 7 ___   |

**Methods: Participants, interventions, and outcomes**

|                      |     |                                                                                                                                                                                                                                                                                                                                                                                |                   |
|----------------------|-----|--------------------------------------------------------------------------------------------------------------------------------------------------------------------------------------------------------------------------------------------------------------------------------------------------------------------------------------------------------------------------------|-------------------|
| Study setting        | 9   | Description of study settings (eg, community clinic, academic hospital) and list of countries where data will be collected. Reference to where list of study sites can be obtained                                                                                                                                                                                             | ___ 8 ___         |
| Eligibility criteria | 10  | Inclusion and exclusion criteria for participants. If applicable, eligibility criteria for study centres and individuals who will perform the interventions (eg, surgeons, psychotherapists)                                                                                                                                                                                   | ___ 9-11 ___      |
| Interventions        | 11a | Interventions for each group with sufficient detail to allow replication, including how and when they will be administered                                                                                                                                                                                                                                                     | ___ 13-17 ___     |
|                      | 11b | Criteria for discontinuing or modifying allocated interventions for a given trial participant (eg, drug dose change in response to harms, participant request, or improving/worsening disease)                                                                                                                                                                                 | ___ 15 ___        |
|                      | 11c | Strategies to improve adherence to intervention protocols, and any procedures for monitoring adherence (eg, drug tablet return, laboratory tests)                                                                                                                                                                                                                              | ___ 14-16 ___     |
|                      | 11d | Relevant concomitant care and interventions that are permitted or prohibited during the trial                                                                                                                                                                                                                                                                                  | ___ 14-17 ___     |
| Outcomes             | 12  | Primary, secondary, and other outcomes, including the specific measurement variable (eg, systolic blood pressure), analysis metric (eg, change from baseline, final value, time to event), method of aggregation (eg, median, proportion), and time point for each outcome. Explanation of the clinical relevance of chosen efficacy and harm outcomes is strongly recommended | ___ 11-13 ___     |
| Participant timeline | 13  | Time schedule of enrolment, interventions (including any run-ins and washouts), assessments, and visits for participants. A schematic diagram is highly recommended (see Figure)                                                                                                                                                                                               | ___ 11, 27-29 ___ |

|   |             |    |                                                                                                                                                                                       |          |
|---|-------------|----|---------------------------------------------------------------------------------------------------------------------------------------------------------------------------------------|----------|
| 1 |             |    |                                                                                                                                                                                       |          |
| 2 |             |    |                                                                                                                                                                                       |          |
| 3 | Sample size | 14 | Estimated number of participants needed to achieve study objectives and how it was determined, including clinical and statistical assumptions supporting any sample size calculations | ___10___ |
| 4 |             |    |                                                                                                                                                                                       |          |
| 5 | Recruitment | 15 | Strategies for achieving adequate participant enrolment to reach target sample size                                                                                                   | ___9___  |
| 6 |             |    |                                                                                                                                                                                       |          |
| 7 |             |    |                                                                                                                                                                                       |          |

### 8 **Methods: Assignment of interventions (for controlled trials)**

#### 9 Allocation:

|    |                                  |     |                                                                                                                                                                                                                                                                                                                                                          |             |
|----|----------------------------------|-----|----------------------------------------------------------------------------------------------------------------------------------------------------------------------------------------------------------------------------------------------------------------------------------------------------------------------------------------------------------|-------------|
| 10 |                                  |     |                                                                                                                                                                                                                                                                                                                                                          |             |
| 11 |                                  |     |                                                                                                                                                                                                                                                                                                                                                          |             |
| 12 | Sequence generation              | 16a | Method of generating the allocation sequence (eg, computer-generated random numbers), and list of any factors for stratification. To reduce predictability of a random sequence, details of any planned restriction (eg, blocking) should be provided in a separate document that is unavailable to those who enrol participants or assign interventions | ___13___    |
| 13 |                                  |     |                                                                                                                                                                                                                                                                                                                                                          |             |
| 14 |                                  |     |                                                                                                                                                                                                                                                                                                                                                          |             |
| 15 |                                  |     |                                                                                                                                                                                                                                                                                                                                                          |             |
| 16 |                                  |     |                                                                                                                                                                                                                                                                                                                                                          |             |
| 17 | Allocation concealment mechanism | 16b | Mechanism of implementing the allocation sequence (eg, central telephone; sequentially numbered, opaque, sealed envelopes), describing any steps to conceal the sequence until interventions are assigned                                                                                                                                                | ___13___    |
| 18 |                                  |     |                                                                                                                                                                                                                                                                                                                                                          |             |
| 19 |                                  |     |                                                                                                                                                                                                                                                                                                                                                          |             |
| 20 |                                  |     |                                                                                                                                                                                                                                                                                                                                                          |             |
| 21 | Implementation                   | 16c | Who will generate the allocation sequence, who will enrol participants, and who will assign participants to interventions                                                                                                                                                                                                                                | ___13___    |
| 22 |                                  |     |                                                                                                                                                                                                                                                                                                                                                          |             |
| 23 |                                  |     |                                                                                                                                                                                                                                                                                                                                                          |             |
| 24 | Blinding (masking)               | 17a | Who will be blinded after assignment to interventions (eg, trial participants, care providers, outcome assessors, data analysts), and how                                                                                                                                                                                                                | ___17-18___ |
| 25 |                                  |     |                                                                                                                                                                                                                                                                                                                                                          |             |
| 26 |                                  |     |                                                                                                                                                                                                                                                                                                                                                          |             |
| 27 |                                  | 17b | If blinded, circumstances under which unblinding is permissible, and procedure for revealing a participant's allocated intervention during the trial                                                                                                                                                                                                     | ___17___    |
| 28 |                                  |     |                                                                                                                                                                                                                                                                                                                                                          |             |
| 29 |                                  |     |                                                                                                                                                                                                                                                                                                                                                          |             |
| 30 |                                  |     |                                                                                                                                                                                                                                                                                                                                                          |             |

### 31 **Methods: Data collection, management, and analysis**

|    |                         |     |                                                                                                                                                                                                                                                                                                                                                                                                              |             |
|----|-------------------------|-----|--------------------------------------------------------------------------------------------------------------------------------------------------------------------------------------------------------------------------------------------------------------------------------------------------------------------------------------------------------------------------------------------------------------|-------------|
| 32 |                         |     |                                                                                                                                                                                                                                                                                                                                                                                                              |             |
| 33 | Data collection methods | 18a | Plans for assessment and collection of outcome, baseline, and other trial data, including any related processes to promote data quality (eg, duplicate measurements, training of assessors) and a description of study instruments (eg, questionnaires, laboratory tests) along with their reliability and validity, if known. Reference to where data collection forms can be found, if not in the protocol | ___11___    |
| 34 |                         |     |                                                                                                                                                                                                                                                                                                                                                                                                              |             |
| 35 |                         |     |                                                                                                                                                                                                                                                                                                                                                                                                              |             |
| 36 |                         |     |                                                                                                                                                                                                                                                                                                                                                                                                              |             |
| 37 |                         |     |                                                                                                                                                                                                                                                                                                                                                                                                              |             |
| 38 |                         | 18b | Plans to promote participant retention and complete follow-up, including list of any outcome data to be collected for participants who discontinue or deviate from intervention protocols                                                                                                                                                                                                                    | ___16-17___ |
| 39 |                         |     |                                                                                                                                                                                                                                                                                                                                                                                                              |             |
| 40 |                         |     |                                                                                                                                                                                                                                                                                                                                                                                                              |             |
| 41 |                         |     |                                                                                                                                                                                                                                                                                                                                                                                                              |             |
| 42 |                         |     |                                                                                                                                                                                                                                                                                                                                                                                                              |             |
| 43 |                         |     |                                                                                                                                                                                                                                                                                                                                                                                                              |             |
| 44 |                         |     |                                                                                                                                                                                                                                                                                                                                                                                                              |             |
| 45 |                         |     |                                                                                                                                                                                                                                                                                                                                                                                                              |             |
| 46 |                         |     |                                                                                                                                                                                                                                                                                                                                                                                                              |             |
| 47 |                         |     |                                                                                                                                                                                                                                                                                                                                                                                                              |             |

1  
2  
3  
4  
5  
6  
7  
8  
9  
10  
11  
12  
13  
14  
15  
16  
17  
18  
19  
20  
21  
22  
23  
24  
25  
26  
27  
28  
29  
30  
31  
32  
33  
34  
35  
36  
37  
38  
39  
40  
41  
42  
43  
44  
45  
46  
47

Data management 19 Plans for data entry, coding, security, and storage, including any related processes to promote data quality (eg, double data entry; range checks for data values). Reference to where details of data management procedures can be found, if not in the protocol \_\_\_\_\_18\_\_\_\_\_

Statistical methods 20a Statistical methods for analysing primary and secondary outcomes. Reference to where other details of the statistical analysis plan can be found, if not in the protocol \_\_\_\_\_18\_\_\_\_\_

20b Methods for any additional analyses (eg, subgroup and adjusted analyses) \_\_\_\_\_18\_\_\_\_\_

20c Definition of analysis population relating to protocol non-adherence (eg, as randomised analysis), and any statistical methods to handle missing data (eg, multiple imputation) \_\_\_\_\_18\_\_\_\_\_

**Methods: Monitoring**

Data monitoring 21a Composition of data monitoring committee (DMC); summary of its role and reporting structure; statement of whether it is independent from the sponsor and competing interests; and reference to where further details about its charter can be found, if not in the protocol. Alternatively, an explanation of why a DMC is not needed \_\_\_\_\_19\_\_\_\_\_

21b Description of any interim analyses and stopping guidelines, including who will have access to these interim results and make the final decision to terminate the trial \_\_\_\_\_19\_\_\_\_\_

Harms 22 Plans for collecting, assessing, reporting, and managing solicited and spontaneously reported adverse events and other unintended effects of trial interventions or trial conduct \_\_\_\_\_18-19\_\_\_\_\_

Auditing 23 Frequency and procedures for auditing trial conduct, if any, and whether the process will be independent from investigators and the sponsor \_\_\_\_\_15-17, 18-19\_\_\_\_\_

**Ethics and dissemination**

Research ethics approval 24 Plans for seeking research ethics committee/institutional review board (REC/IRB) approval \_\_\_\_\_18\_\_\_\_\_

Protocol amendments 25 Plans for communicating important protocol modifications (eg, changes to eligibility criteria, outcomes, analyses) to relevant parties (eg, investigators, REC/IRBs, trial participants, trial registries, journals, regulators) \_\_\_\_\_18\_\_\_\_\_



|    |                               |     |                                                                                                                                                                                                                                                                                     |             |
|----|-------------------------------|-----|-------------------------------------------------------------------------------------------------------------------------------------------------------------------------------------------------------------------------------------------------------------------------------------|-------------|
| 1  |                               |     |                                                                                                                                                                                                                                                                                     |             |
| 2  |                               |     |                                                                                                                                                                                                                                                                                     |             |
| 3  | Consent or assent             | 26a | Who will obtain informed consent or assent from potential trial participants or authorised surrogates, and how (see Item 32)                                                                                                                                                        | ___9___     |
| 4  |                               |     |                                                                                                                                                                                                                                                                                     |             |
| 5  |                               |     |                                                                                                                                                                                                                                                                                     |             |
| 6  |                               | 26b | Additional consent provisions for collection and use of participant data and biological specimens in ancillary studies, if applicable                                                                                                                                               | ___N/A___   |
| 7  |                               |     |                                                                                                                                                                                                                                                                                     |             |
| 8  | Confidentiality               | 27  | How personal information about potential and enrolled participants will be collected, shared, and maintained in order to protect confidentiality before, during, and after the trial                                                                                                | ___9, 18___ |
| 9  |                               |     |                                                                                                                                                                                                                                                                                     |             |
| 10 |                               |     |                                                                                                                                                                                                                                                                                     |             |
| 11 | Declaration of interests      | 28  | Financial and other competing interests for principal investigators for the overall trial and each study site                                                                                                                                                                       | ___26___    |
| 12 |                               |     |                                                                                                                                                                                                                                                                                     |             |
| 13 |                               |     |                                                                                                                                                                                                                                                                                     |             |
| 14 | Access to data                | 29  | Statement of who will have access to the final trial dataset, and disclosure of contractual agreements that limit such access for investigators                                                                                                                                     | ___18___    |
| 15 |                               |     |                                                                                                                                                                                                                                                                                     |             |
| 16 |                               |     |                                                                                                                                                                                                                                                                                     |             |
| 17 | Ancillary and post-trial care | 30  | Provisions, if any, for ancillary and post-trial care, and for compensation to those who suffer harm from trial participation                                                                                                                                                       | ___N/A___   |
| 18 |                               |     |                                                                                                                                                                                                                                                                                     |             |
| 19 |                               |     |                                                                                                                                                                                                                                                                                     |             |
| 20 | Dissemination policy          | 31a | Plans for investigators and sponsor to communicate trial results to participants, healthcare professionals, the public, and other relevant groups (eg, via publication, reporting in results databases, or other data sharing arrangements), including any publication restrictions | ___19___    |
| 21 |                               |     |                                                                                                                                                                                                                                                                                     |             |
| 22 |                               |     |                                                                                                                                                                                                                                                                                     |             |
| 23 |                               |     |                                                                                                                                                                                                                                                                                     |             |
| 24 |                               |     |                                                                                                                                                                                                                                                                                     |             |
| 25 |                               | 31b | Authorship eligibility guidelines and any intended use of professional writers                                                                                                                                                                                                      | ___19___    |
| 26 |                               |     |                                                                                                                                                                                                                                                                                     |             |
| 27 |                               | 31c | Plans, if any, for granting public access to the full protocol, participant-level dataset, and statistical code                                                                                                                                                                     | ___N/A___   |
| 28 |                               |     |                                                                                                                                                                                                                                                                                     |             |
| 29 | <b>Appendices</b>             |     |                                                                                                                                                                                                                                                                                     |             |
| 30 |                               |     |                                                                                                                                                                                                                                                                                     |             |
| 31 | Informed consent materials    | 32  | Model consent form and other related documentation given to participants and authorised surrogates                                                                                                                                                                                  | ___N/A___   |
| 32 |                               |     |                                                                                                                                                                                                                                                                                     |             |
| 33 |                               |     |                                                                                                                                                                                                                                                                                     |             |
| 34 | Biological specimens          | 33  | Plans for collection, laboratory evaluation, and storage of biological specimens for genetic or molecular analysis in the current trial and for future use in ancillary studies, if applicable                                                                                      | ___N/A___   |
| 35 |                               |     |                                                                                                                                                                                                                                                                                     |             |
| 36 |                               |     |                                                                                                                                                                                                                                                                                     |             |

37 \*It is strongly recommended that this checklist be read in conjunction with the SPIRIT 2013 Explanation & Elaboration for important clarification on the items.  
 38 Amendments to the protocol should be tracked and dated. The SPIRIT checklist is copyrighted by the SPIRIT Group under the Creative Commons  
 39 "[Attribution-NonCommercial-NoDerivs 3.0 Unported](https://creativecommons.org/licenses/by-nc-nd/3.0/)" license.  
 40
